# Supplementary material
Source: PubMed Central journal article supplement (PMC7726813)
Supplement: EMBR-21-e50421-s001.pdf [file EMBR-21-e50421-s001.pdf]

# Appendix

## Table of contents

| File                                                                                                | Page |
|-----------------------------------------------------------------------------------------------------|------|
| Appendix Table S1: Oligonucleotide sequences for qPCR of indicated mRNAs                            | 1    |
| Appendix Table S2: Composition of human study population for isolation of lung alveolar macrophages | 2    |
| Appendix Figure S1: Phyllogenetic Tree PB1-F2 protein sequences                                     | 3    |

Appendix Table S1. Gene specific primers for qPCR and cloning

| Gene (RT-qPCR)                                 | Sequence                                                                                                                 |
|------------------------------------------------|--------------------------------------------------------------------------------------------------------------------------|
| M1 (viral mRNA)                                | 5'-AGATGAGTCTTCTAACCGAGTCG-3'<br>5'-TGCAAAAACATCTTCAGTCTCTG-3'                                                           |
| 18S                                            | 5'-GTAACCCGTTGAACCCATT-3'<br>5'-CCATCCAATCGGTAGTAGCG-3'                                                                  |
| IFN $\beta$                                    | 5'-TCTGGCACAACAGGTAGTAGGC-3'<br>5'-GAGAAGCACAACAGGAGAGCAA-3'                                                             |
| IP-10                                          | 5'-GGAACCTCCAGTCTCAGCACCA-3'<br>5'-AGACATCTCTTCTCACCTTC-3'                                                               |
| IL-6                                           | 5'-ATGAACTCCTTCTCCACAAGCGC-3'<br>5'-GAAGAGCCCTCAGGCTGGACTG-3'                                                            |
| CCL2                                           | 5'-TCGCCTCCATCATGAAAGTC-3'<br>5'-TTGCATCTGGCTGAGCGAG-3'                                                                  |
| TNF- $\alpha$                                  | 5'-ATGAGCACTGAAAGCATGATCC-3'<br>5'-GAGGGCTGATTAGAGAGAGGTC-3'                                                             |
| ISG15                                          | 5'-TCCTGGTGAGGAATAACAAGGG-3'<br>5'-GTCAGCCAGAACAGGTCGTC-3'                                                               |
| IL-1 $\beta$                                   | 5'-CTCGCCAGTGAAATGATGGCT-3'<br>5'-GTCGGAGATTCGTAGCTGGAT-3'                                                               |
| Caspase-1                                      | 5'-AGGATATGGAAACAAAAGTCGGC-3'<br>5'-AGATAATGAGAGCAAGACGTGTG-3'                                                           |
| Sequence + receptor plasmid                    | Sequence                                                                                                                 |
| NLRP3 + pCAGGS-V5-MCS                          | 5'-GCGTACATGCATCCAAGATGGCAAGCACCCGCTGCAG-3'<br>5'-GCGTACCTCGAGCTACCAAGAAGGCTCAAAGACG-3'                                  |
| PYRIN + pCAGGS-V5-MCS                          | 5'-ATCTTACTCGAGAAGATGGCAAGCACCCGCTGCAAG-3'<br>5'-GTATTGGCTAGCCTATAAACCCATCCACTCCTCTTC-3'                                 |
| NACHT + pCAGGS-V5-MCS                          | 5'-ATCTTACTCGAGCTGGAGTACCTTTGAGA-3'<br>5'-GTATTGGCTAGCCTAGATCTTGCAACTTAATTC-3'                                           |
| LRR + pCAGGS-V5-MCS                            | 5'-ATCTTACTCGAGTCTCAGCAAATCAGGCTG-3'<br>5'-GTATTGGCTAGCCTACGAGCCAAGAAGGCTCA-3'                                           |
| Nek7 + pCAGGS-V5-MCS                           | 5'-ATCTTACTCGAGGATGAGCAATCACAAGGAATGCAAG-3'<br>5'-GTATTGGCTAGCTTAGCTGCTTGCAAGTGCATGCATG-3'                               |
| V5-ZsGreen-PB1-F2 + pCAGGS-MCS                 | 5'-ATCTTAGGTACCATGGGTAAGCCTATCCCTAACCTCTCCTCGGTCTC<br>GATTCTACGATGGCCAGTCCAAG-3'<br>5'-GTATTGGCTAGCTCAGTTTATCCACTCTTG-3' |
| PB1-F2 H7N9 (Sha) +<br>pCAGGS-Flag-ZsGreen-MCS | 5'-ATCTTACTCGAGGAACAGGAACAGGAT-3'<br>5'-GTATTGGCTAGCTCAGTTTATCCACTCT-3'                                                  |
| PB1-F2 H3N2 (Wyo) +<br>pCAGGS-Flag-ZsGreen-MCS | (Mazel-Sanchez et al., 2018)                                                                                             |

Mazel-Sanchez, B., Boal-Carvalho, I., Silva, F., Dijkman, R., and Schmolke, M. (2018). H5N1 Influenza A Virus PB1-F2 Relieves HAX-1-Mediated Restriction of Avian Virus Polymerase PA in Human Lung Cells. *J Virol* 92.

**Appendix Table S2. Clinical characteristics of the study population**

| Patient ID                             | hAMV1                                                          | hAMV2                                      | hAMV3                          | hAMV4                          | hAMV5                           |
|----------------------------------------|----------------------------------------------------------------|--------------------------------------------|--------------------------------|--------------------------------|---------------------------------|
| Age (years)                            | 1.2                                                            | 1.3                                        | 16.4                           | 16.4                           | 16.8                            |
| Sex                                    | Female                                                         | Female                                     | Female                         | Female                         | Female                          |
| Reason for BAL                         | Suspected foreign body aspiration                              | Surfactant B defect, post LTx surveillance | CF, post LTx surveillance      | PAH, post LTx surveillance     | CF, early post LTx surveillance |
| Time post LTx (months)                 | n.a.                                                           | 9                                          | 2                              | 3                              | 0.25                            |
| Clinical findings                      | Insuspicious respiratory tract, apple piece in upper esophagus | Insuspicious respiratory tract             | Insuspicious respiratory tract | Insuspicious respiratory tract | Desquamative bronchitis         |
| Cytology of BAL portion 3              |                                                                |                                            |                                |                                |                                 |
| <i>AM (%)</i>                          | 94                                                             | 94                                         | 96                             | 97                             | 91                              |
| <i>Lymphocytes (%)</i>                 | 3                                                              | 3                                          | 3                              | 2                              | 7                               |
| <i>Granulocytes (%)</i>                | 3                                                              | 3                                          | 1                              | 1                              | 2                               |
| Medication                             |                                                                |                                            |                                |                                |                                 |
| <i>Prednisolon (mg/kg/d)</i>           | None                                                           | 0.1                                        | 0.2                            | 0.2                            | 0.6                             |
| <i>MMF (mg/kg/d)</i>                   | None                                                           | 45                                         | 33                             | 33                             | 45                              |
| <i>Tacrolimus (trough level, µg/l)</i> | None                                                           | 4.6                                        | 24                             | 16                             | 22                              |
| <i>Antibiotics</i>                     | None                                                           | None                                       | None                           | None                           | Meropenem, Tobramycin           |

LTx, lung transplantation; CF, cystic fibrosis; PAH, pulmonary arterial hypertension; n.a., not applicable; MMF, mycophenolate mofetil

Tree scale: 0.1

**Appendix Figure S1: Phylogenetic Tree PB1-F2 protein sequences. P**

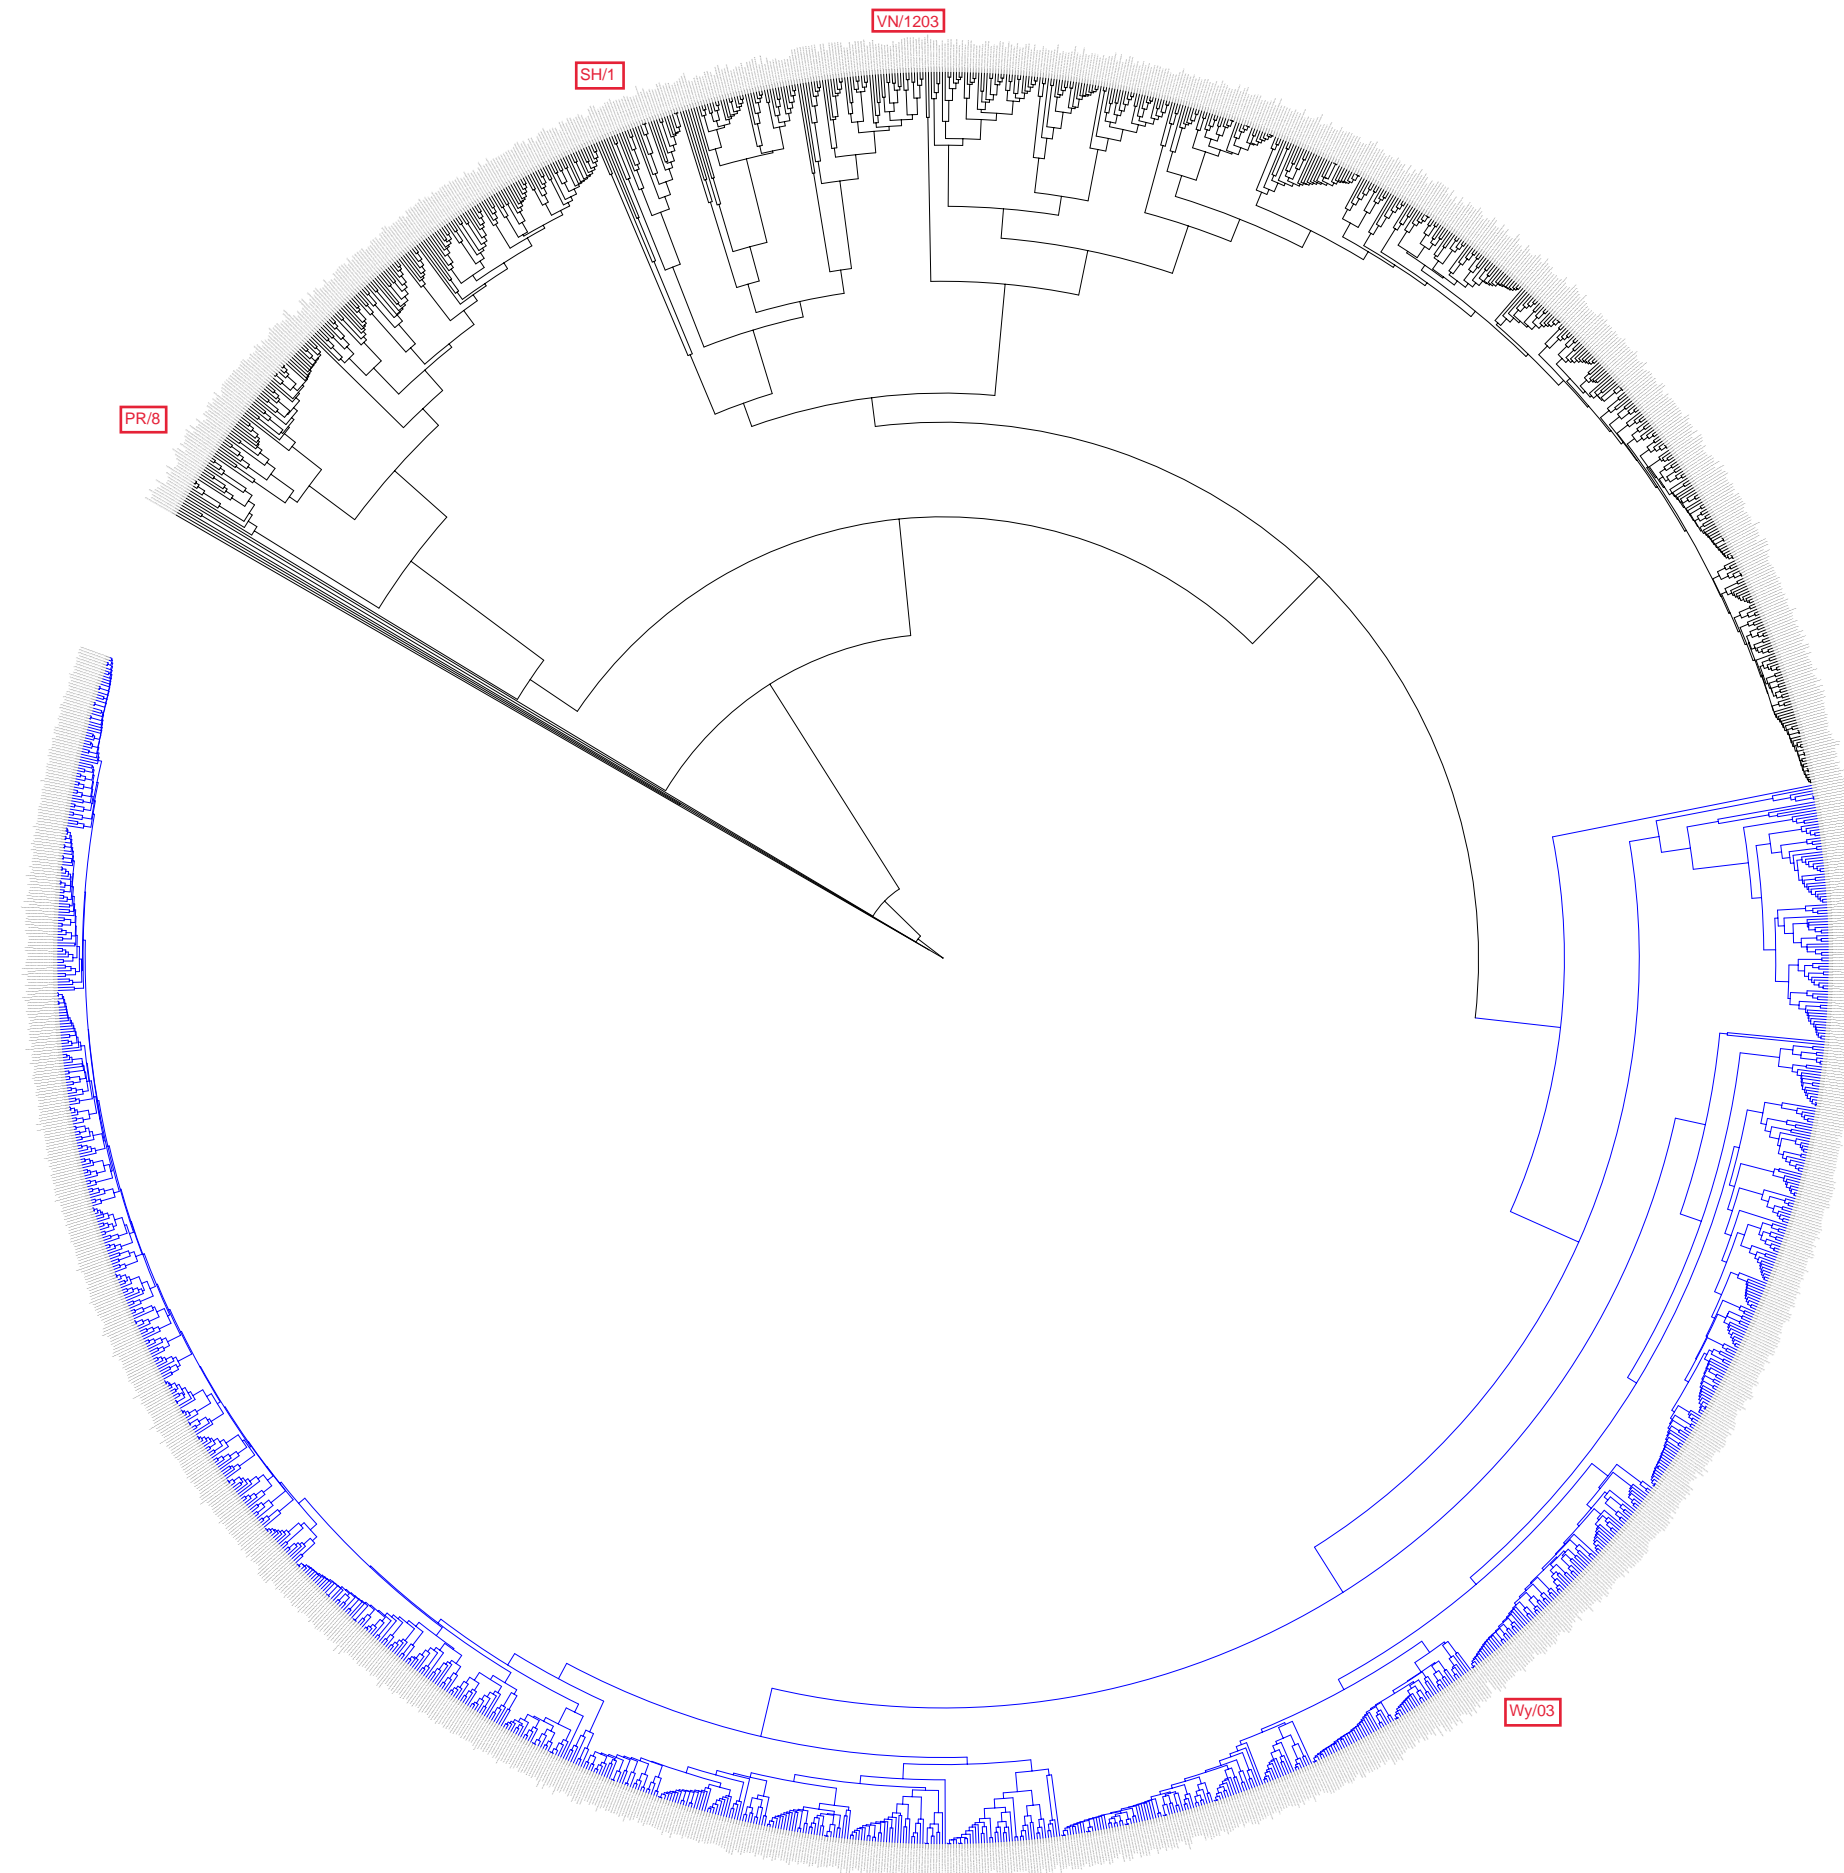

Phylogenetic Tree Obtained from of PB1-F2 protein Sequences of Influenza A virus Selected from Various Epidemic Periods, After Removal of Partial Sequences. The Multiple sequence alignment and NJ was performed in MAFFT (Kuraku et al., 2013) using default parameters. The Newick resulting tree was formatted in MEGA7 (Molecular Evolutionary Genetics Analysis) (Kumar et al., 2016). Sequences obtained for Wyoming formed a large cluster colored in blue. The tree is not rooted and drawn to scale, with branch lengths in the same units as those of the evolutionary distances used to infer the phylogenetic tree. Positions of PB1-F2 from viruses/PB1-F2s used in this study are indicated.
