# Supplementary material
Source: PubMed Central journal article supplement (PMC7726813)
Supplement: EMBR-21-e50421-s002.pdf [file EMBR-21-e50421-s002.pdf]

## Expanded View Figures

**Figure EV1. Contemporary IAV strains lacking PB1-F2 do not display an *in vivo* phenotype in mice or murine cells.**

- A THP-1-derived macrophages were infected with the wild-type (Wt) and  $\Delta$ F2 H5N1 (VN) virus at MOI 5 for 24 h. Levels of IL-1 $\beta$  were measured by ELISA. The mean  $\pm$  standard deviation of five independent experiments is shown. Statistical analysis was performed by one-way ANOVA, and *P*-values are indicated.
- B THP-1-derived macrophages were infected with the wild-type (Wt) and  $\Delta$ F2 H5N1 (VN) virus at MOI 10 for 12 h. Levels of IL-1 $\beta$  were measured by ELISA. The mean  $\pm$  standard deviation of three independent experiments is shown. Statistical analysis was performed by one-way ANOVA, and *P*-values are indicated.
- C Lung viral loads from 5 individual mice on day 3 post-infection were assessed by plaque assay on MDCK cells. Median titers are indicated. Statistical analysis was performed by Student's *t*-test as compared to mock samples (\**P* < 0.05, \*\**P* < 0.01).
- D Groups of *n* = 5 mice were mock treated or infected with 40 pfu of the VN Wt or VN  $\Delta$ F2 strains for 3 days. LDH assay was performed on BAL samples in technical duplicates (<sup>#</sup>*P* < 0.05 compared with wt, \*\**P* < 0.01 compared with mock).
- E ELISA for IL-1 $\beta$  in BALF of mock (*n* = 3), VN Wt (*n* = 5) or VN  $\Delta$ F2 (*n* = 5) infected mice.
- F–O Groups of mice were mock treated (*n* = 2) or infected with 40 pfu of the VN Wt (*n* = 5) or VN  $\Delta$ F2 (*n* = 4–5, of note for F–H the staining for macrophages for the red sample failed due to technical problems and is not indicated) for 7 days. Flow cytometry data for indicated cell populations. Statistical analysis was performed by one-way ANOVA, and *P*-values are indicated. (\**P* < 0.05, \*\**P* < 0.01, \*\*\**P* < 0.001).
- P Groups of *n* = 3–5 mice were infected with 40 pfu of the VN Wt or VN  $\Delta$ F2 strains for 8–11 days. Lung viral loads were assessed by plaque assay on MDCK cells.
- Q *Streptococcus pneumoniae* colonies in serial dilutions of lung homogenate are shown in trypticase soy agar +5% sheep blood plates. Representative results are shown in technical triplicates.
- R *Streptococcus pneumoniae* bacteria in the lungs (cfu/organ) 24 h post-infection from mock treated, VN Wt or VN  $\Delta$ F2 pre-infected animals (mock *n* = 4, virus infected *n* = 5). Median values  $\pm$  SD are indicated. Statistical analysis was performed by one-way ANOVA. *P*-values toward mock samples are indicated. (\*\**P* < 0.01, \*\*\**P* < 0.001).
- S ELISA for IL-1 $\beta$  secretion in BMDMs (*n* = 3) mock treated or infected with VN Wt and  $\Delta$ F2 strains. Statistical analysis was performed by one-way ANOVA, and *P*-values are indicated. Median values  $\pm$  SD are indicated. *P*-values toward mock samples are indicated. (\*\*\*\**P* < 0.0001).
- T Immunoblot of cell lysates from (S). For all panels, the median of the indicated independent experiments is shown.

Source data are available online for this figure.

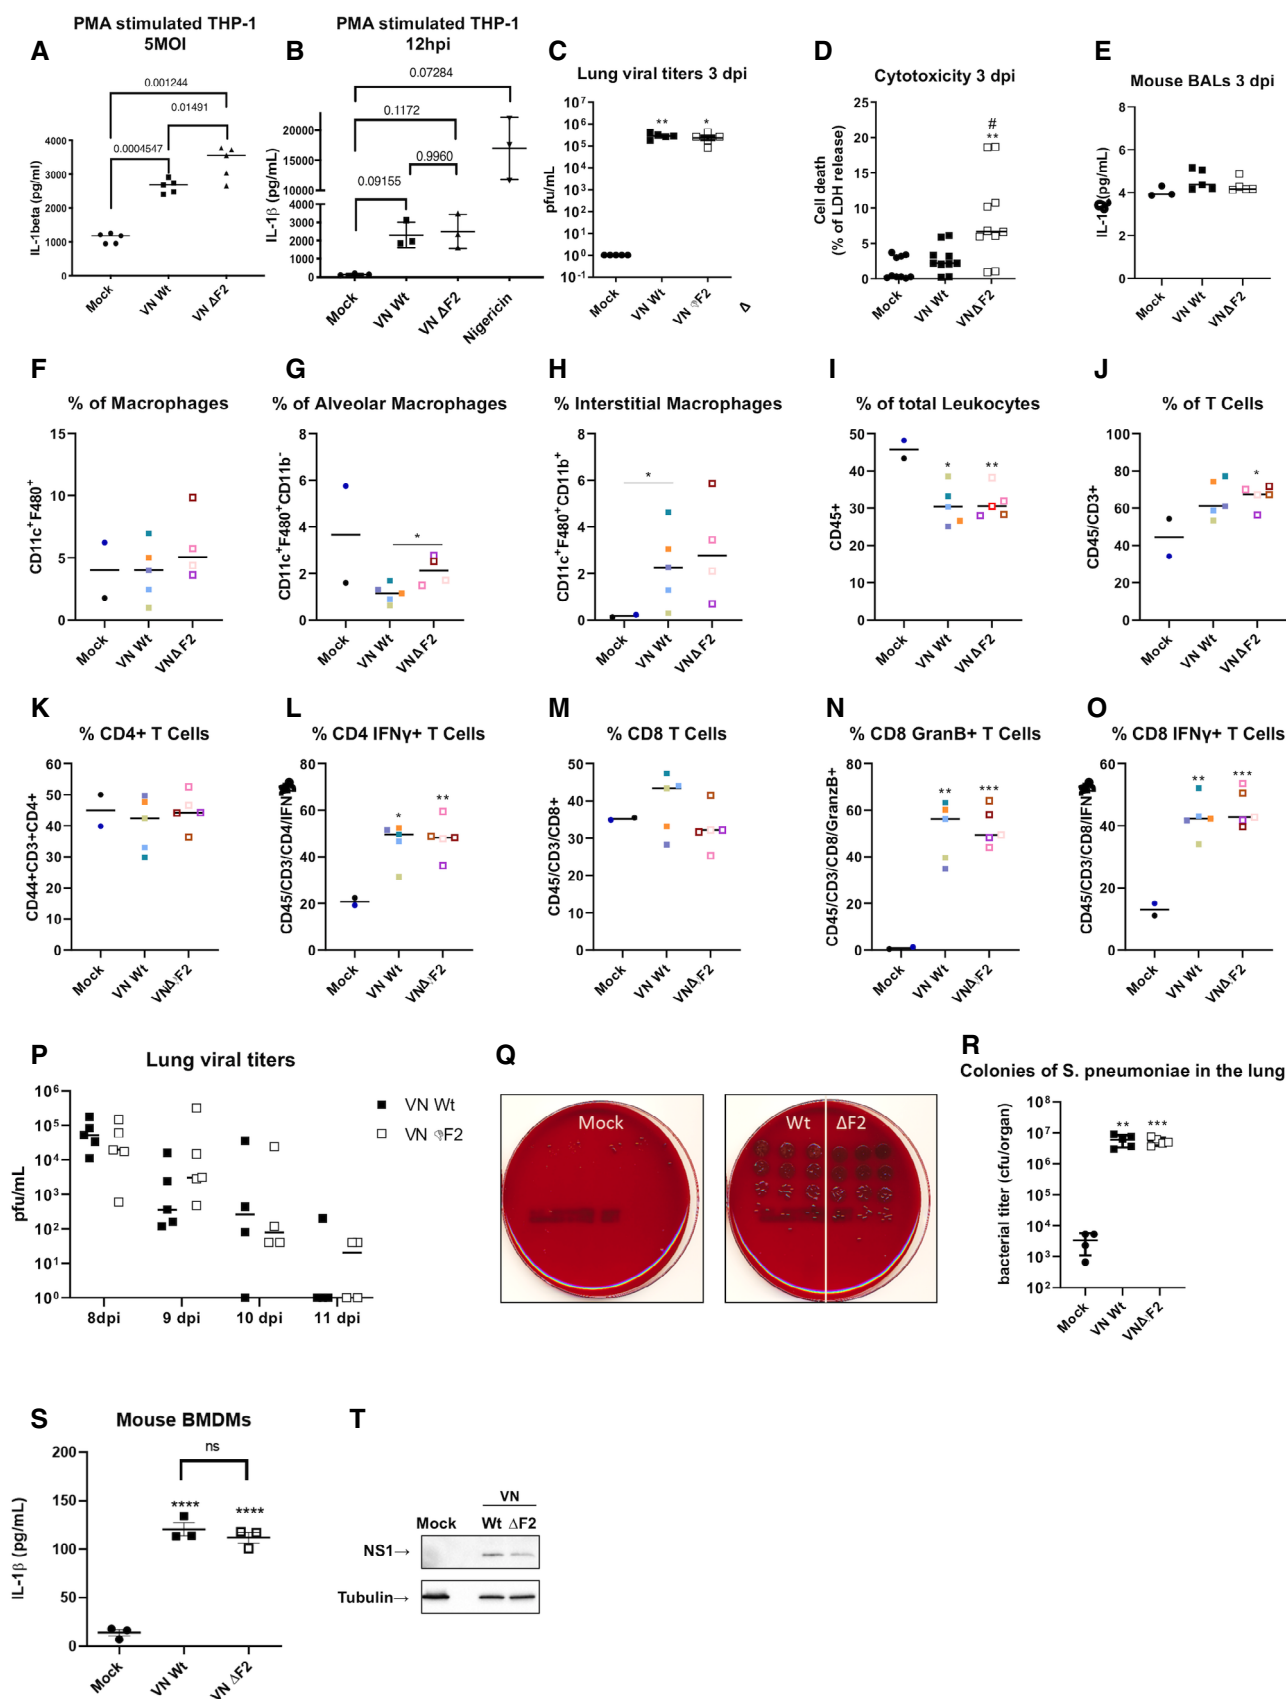

Figure EV1.

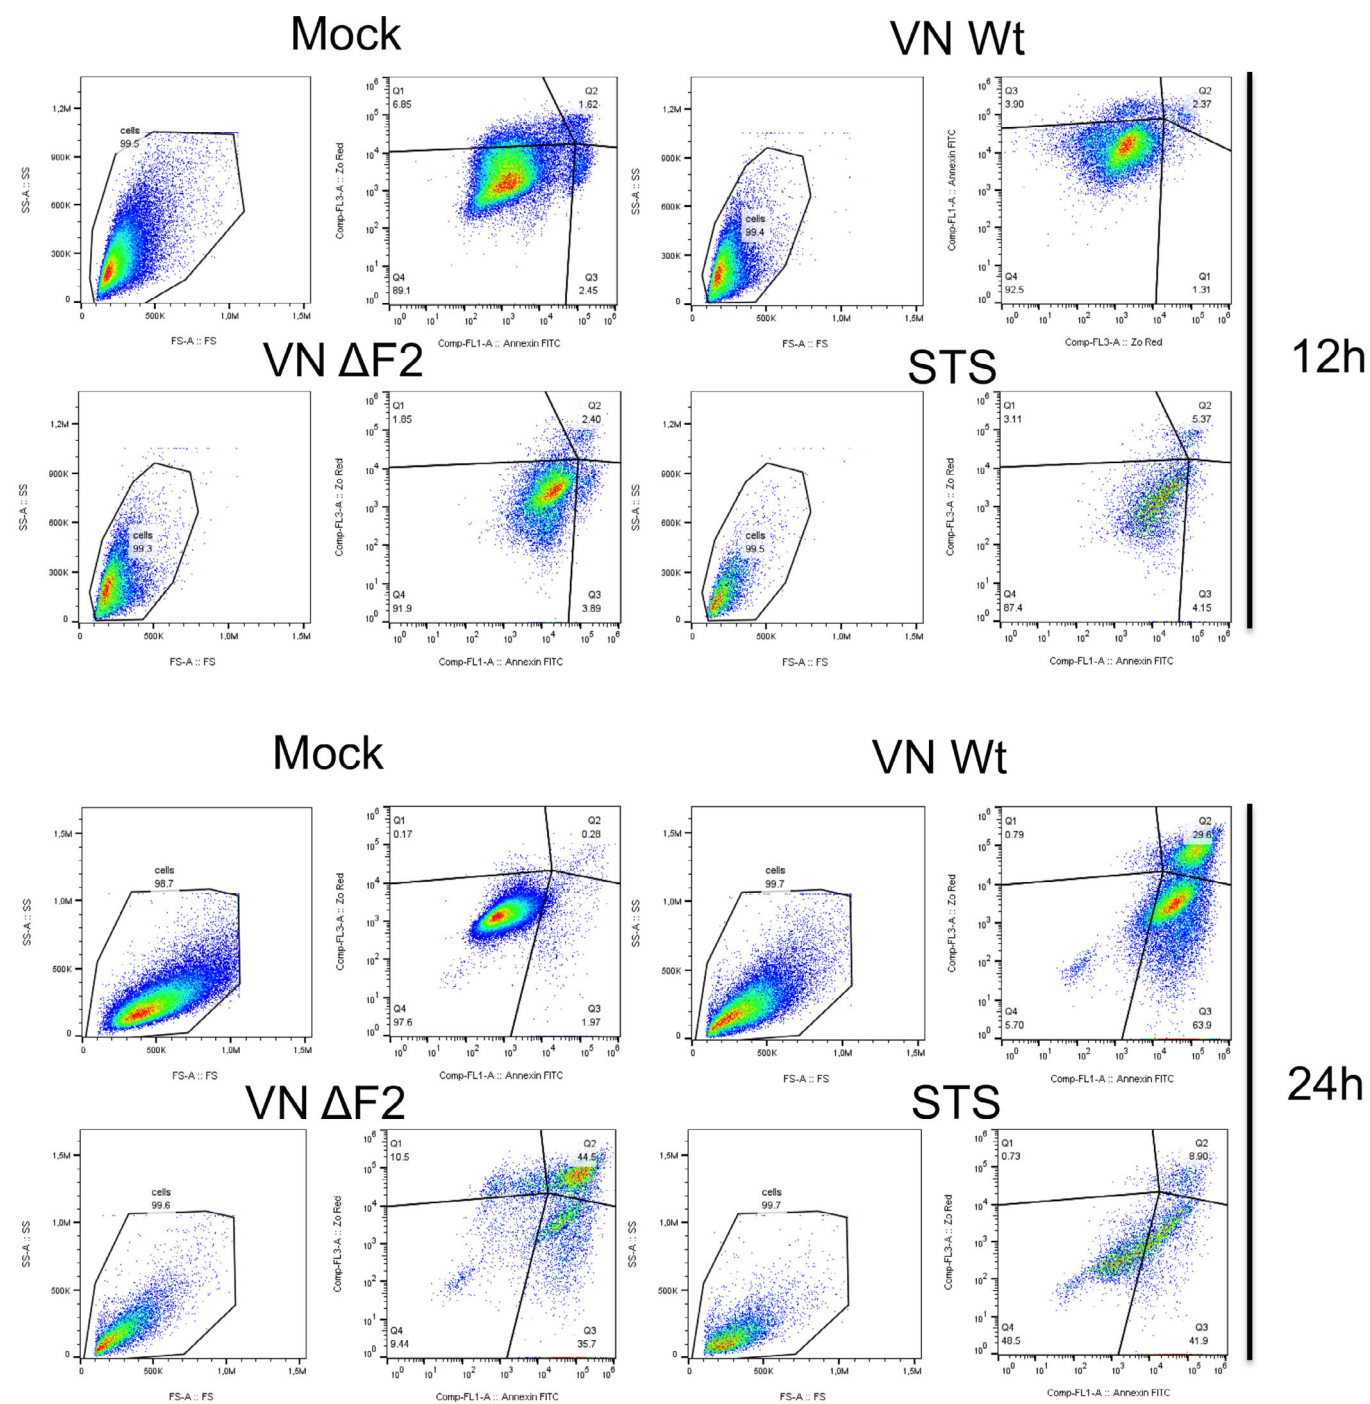

**Figure EV2. Representative FACS plots for Annexin V and Zombie-Red staining.**

Upper panels show representative panels for Fig 2A/B, lower panels show representative panels for Fig 2C/D.

**Figure EV3. Induction of NF- $\kappa$ B-dependent genes upon H5N1 infection.**

A–X THP-1 cells were mock treated or infected with the VN Wt and  $\Delta$ F2 strains for 4 h (A–H), 8 h (I–O), 18 h (P), and 24 h (Q–X) at MOI MOI 6 (I–O)–10 (A–H and P–X). Relative expression levels normalized to the average of mock were determined by RT–qPCR for indicated mRNAs normalized to 18S rRNA and calibrated to mock. The mean  $\pm$  standard deviation of 2–6 independent experiments with at least two technical replicates each is shown (each dot represents an independent biological sample). Statistical analysis was performed by paired two-tailed Student's *t*-test, and *P*-values are indicated.

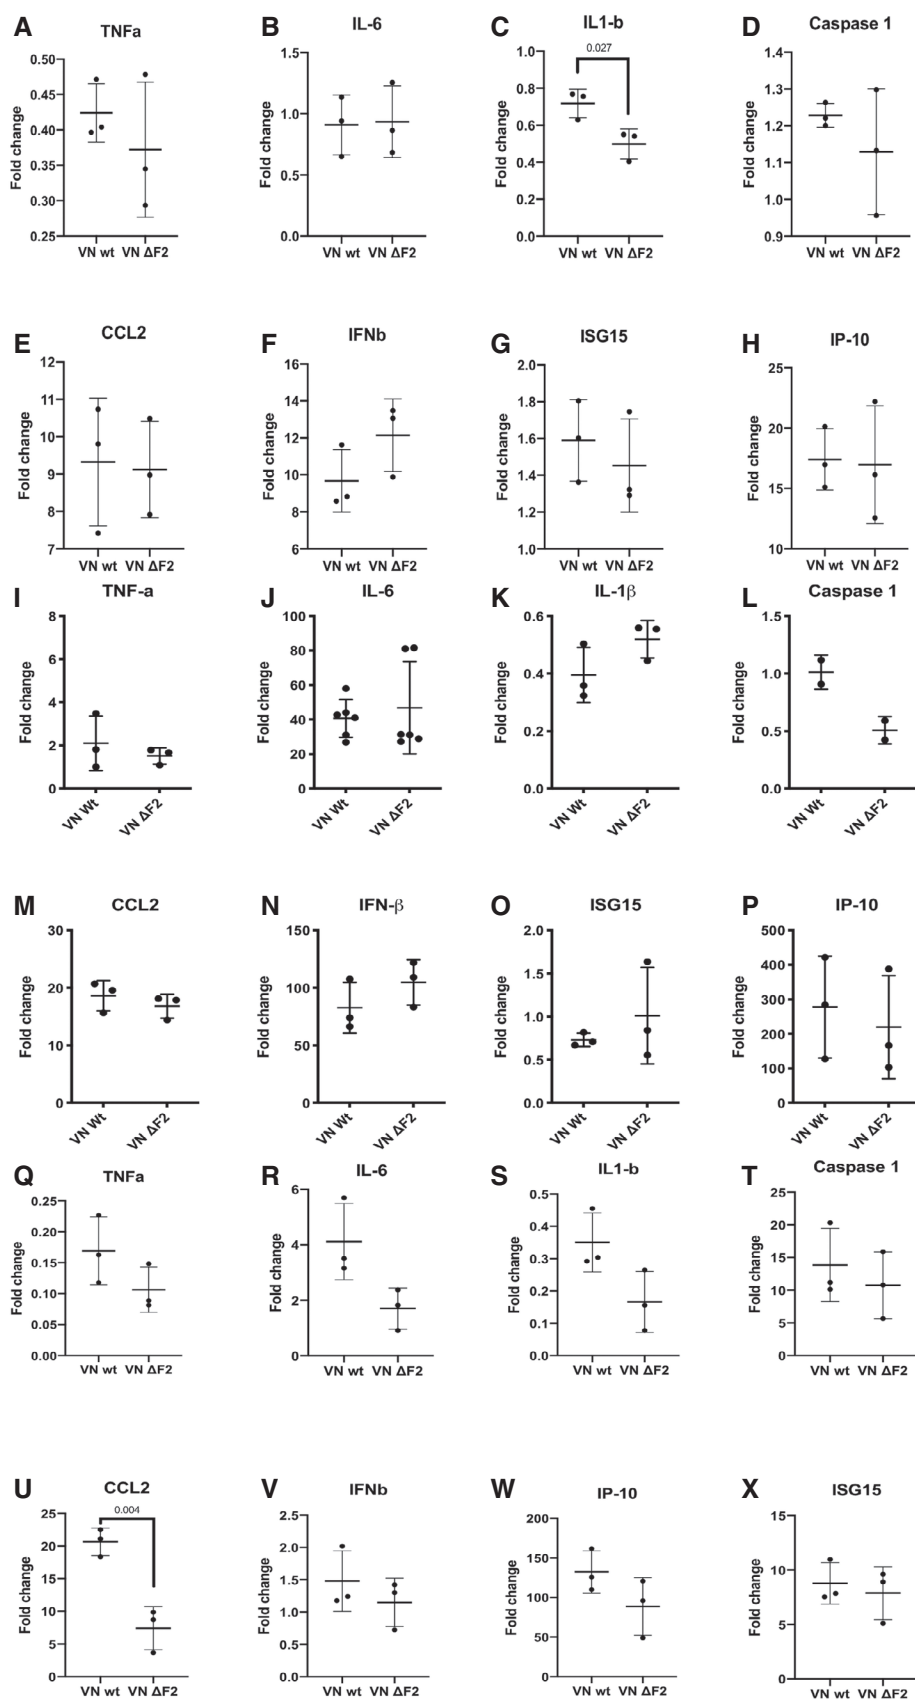

Figure EV3.

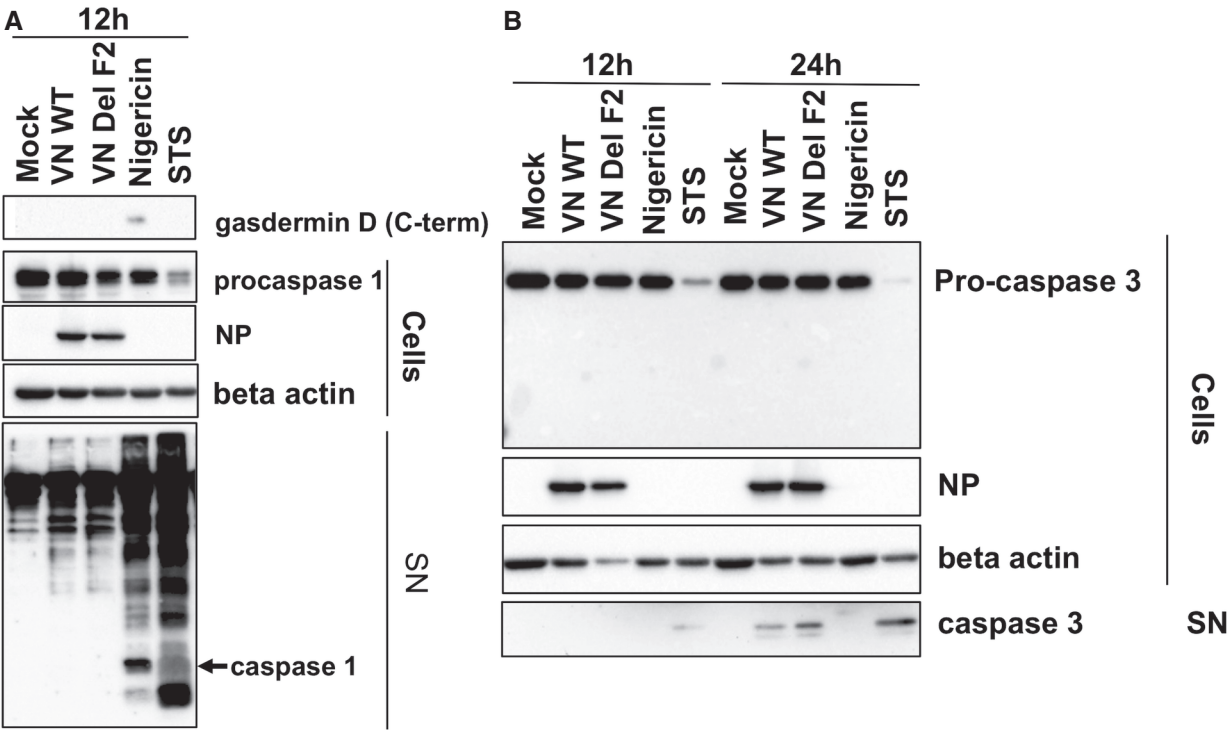

**Figure EV4. IAV dependent activation of the NLRP3 inflammasome and caspase 3 after 12 and 24 h.**

A Supernatants of THP-1 cells infected with VN Wt and  $\Delta F2$  virus at a MOI 10 for 12 h or treated with 6.7  $\mu M$  of nigericin for 45 min or treated with 1  $\mu M$  of staurosporine for 12 h or 24 h were analyzed by immunoblotting against gasdermin D, caspase 1, NP, and beta actin ( $n = 3$ ).

B Supernatants and cell lysates of THP-1 cells infected with VN Wt and  $\Delta F2$  virus at a MOI 10 for 12 h or treated with 6.7  $\mu M$  of nigericin for 45 min or treated with 1  $\mu M$  of staurosporin for 12 h were analyzed by immunoblotting against caspase 1, NP, and beta actin ( $n = 3$ ).

Source data are available online for this figure.
