# Supplementary material
Source: PubMed Central journal article supplement (PMC7726813)
Supplement: EMBR-21-e50421-s003.pdf [file EMBR-21-e50421-s003.pdf]

Source data Figure 1A (cropped region indicated)

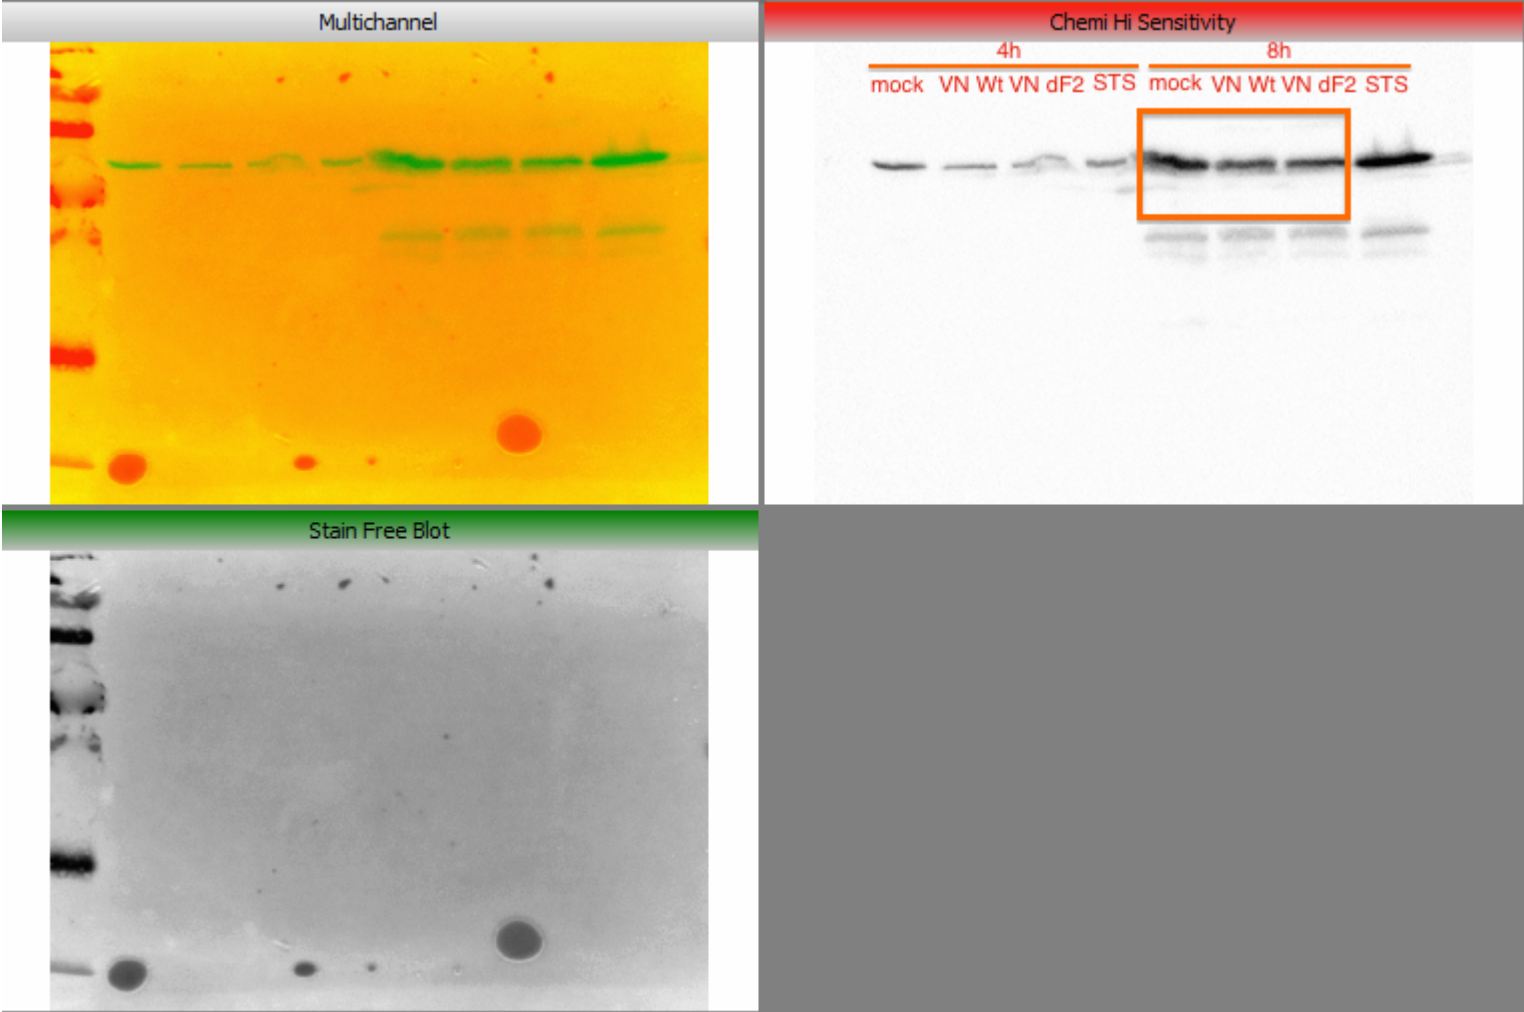

Anti beta actin

Source data Figure 1A (cropped region indicated)

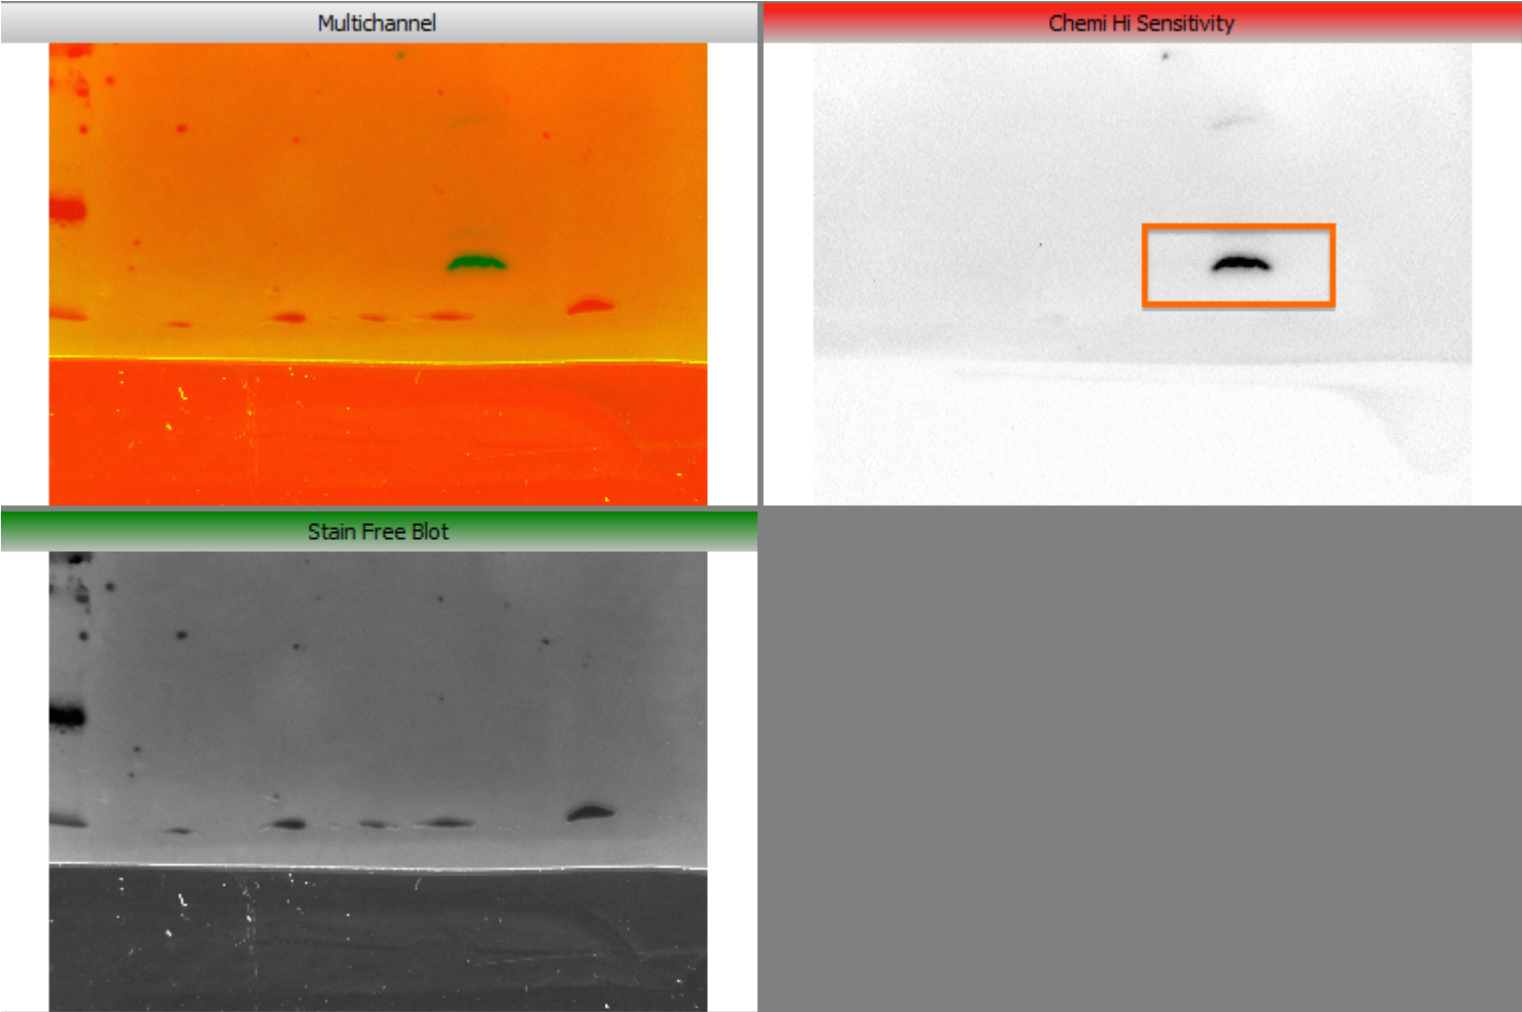

Anti PB1-F2

Source data Figure 1A (cropped region indicated)

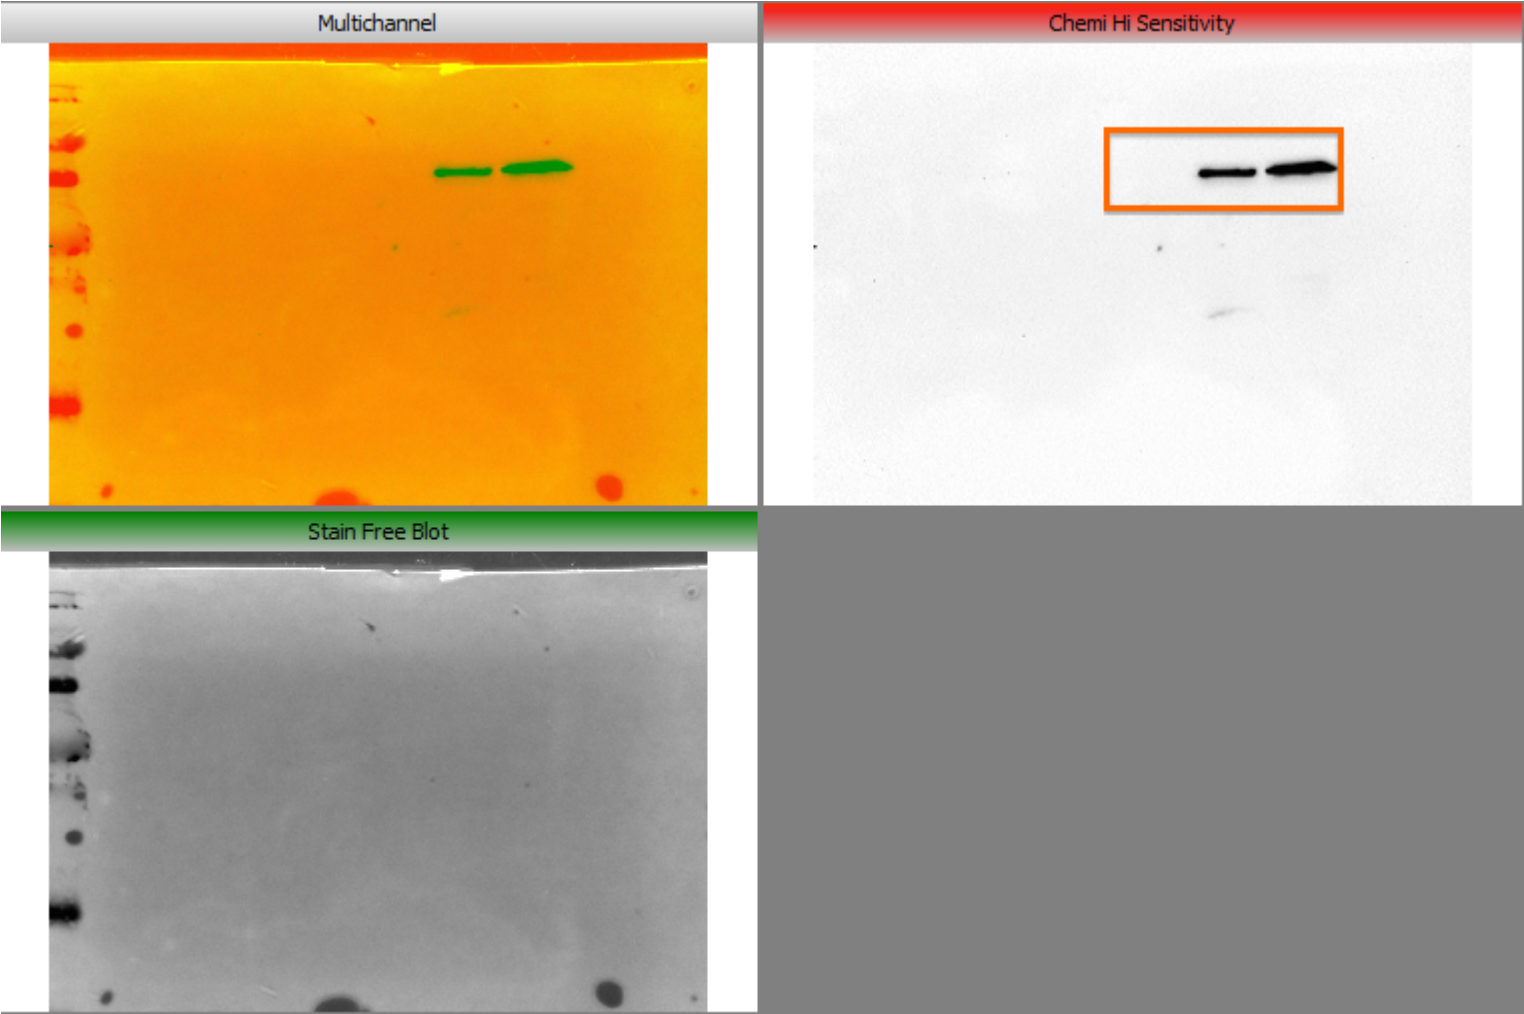

Anti NP

Source data Figure 1B (cropped region indicated)

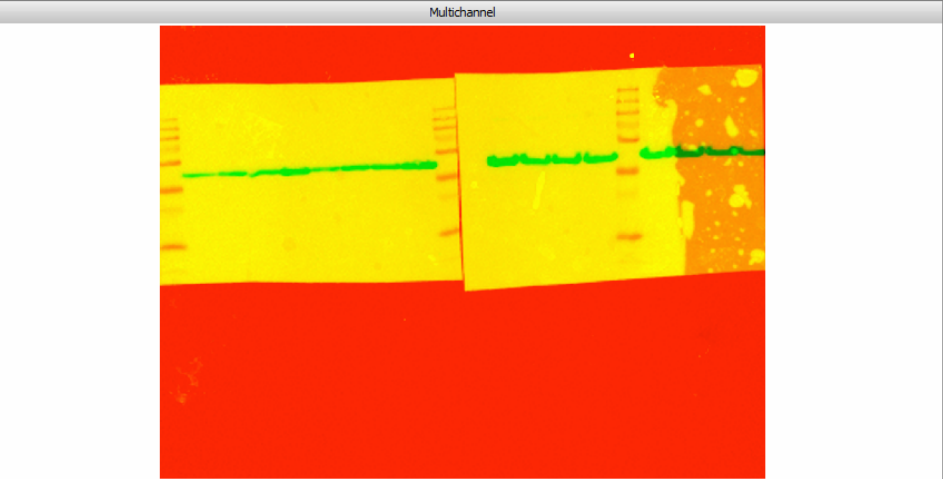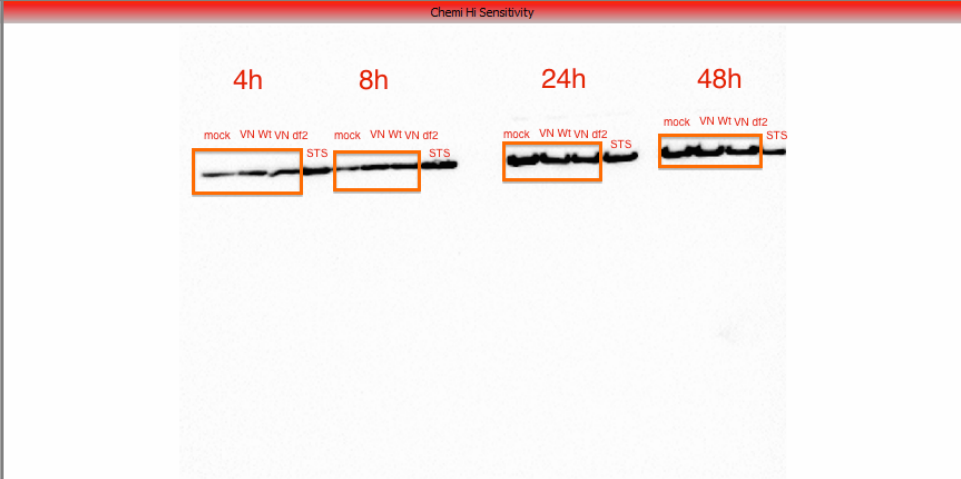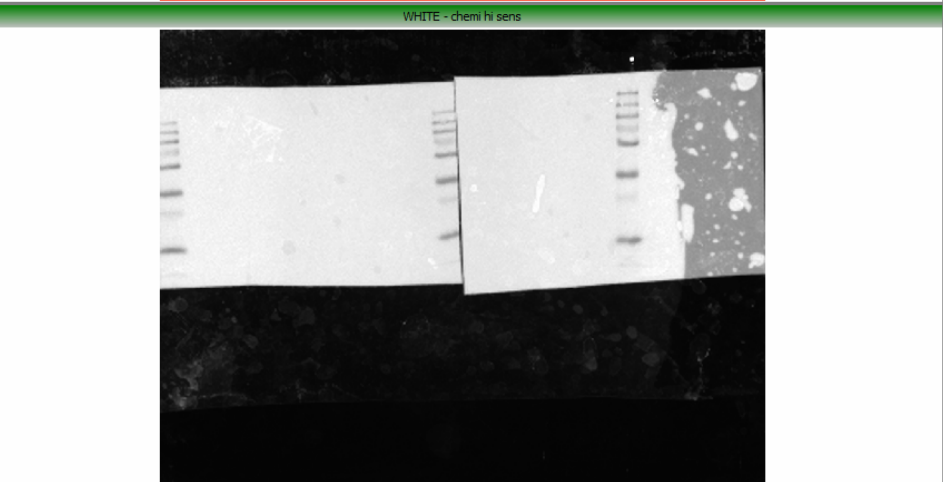

Anti beta actin

# Source data Figure 1B (cropped region indicated)

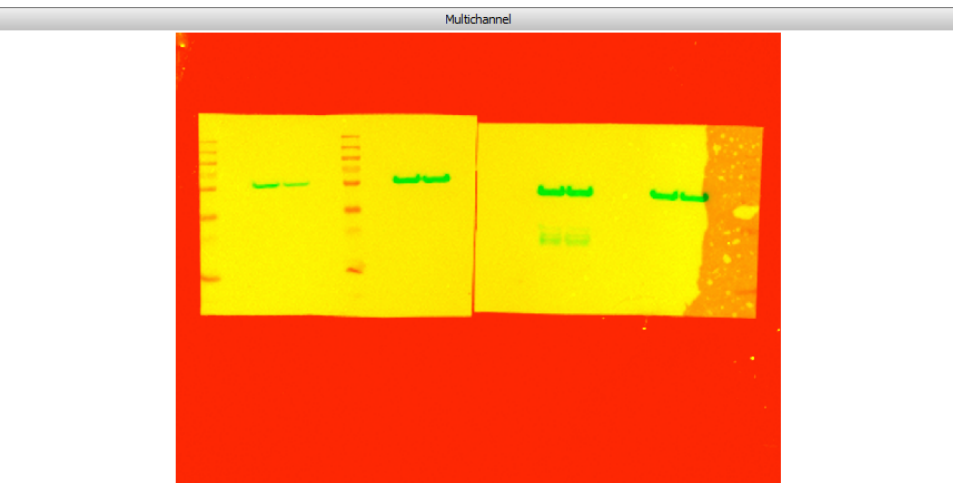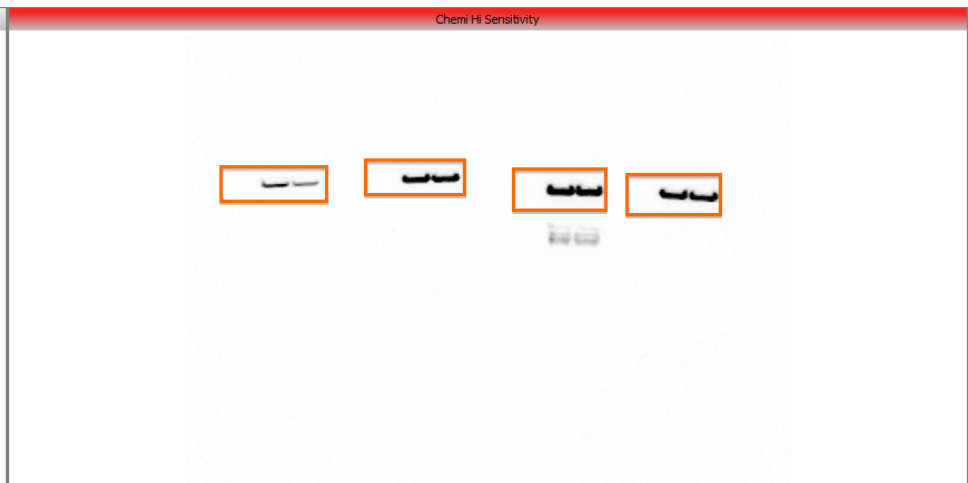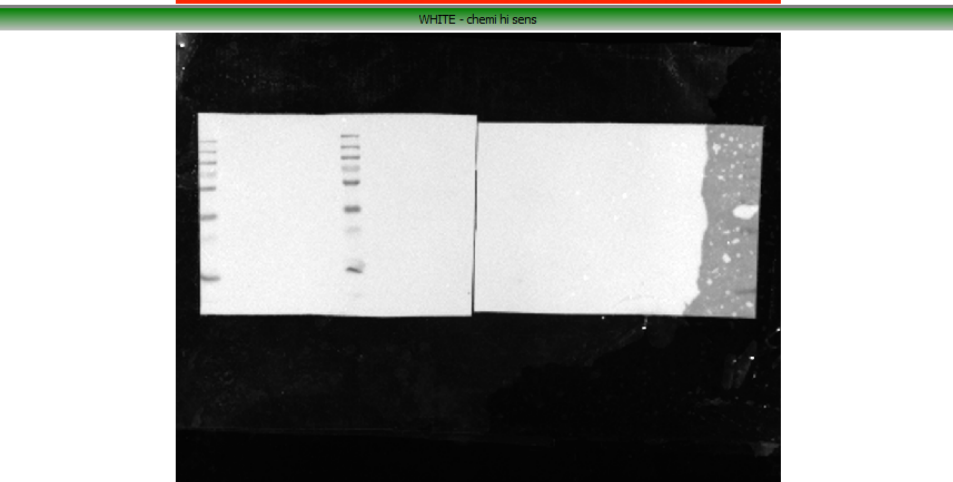

Anti NP

Source data Figure 1F (cropped region indicated)

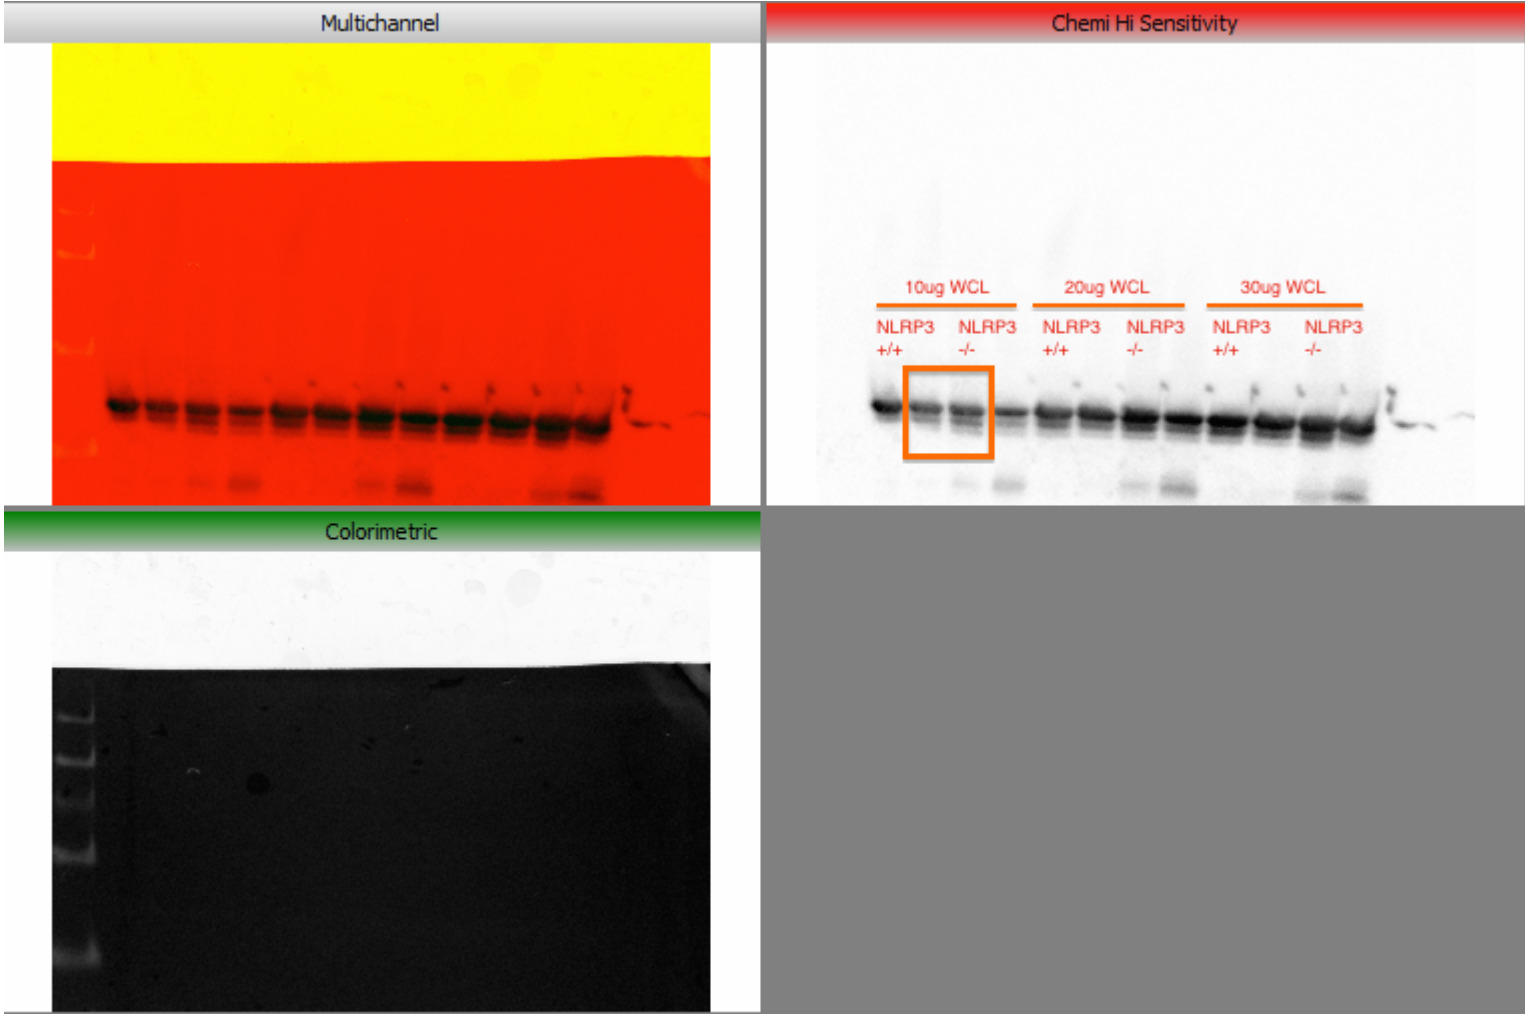

Anti NP

Source data Figure 1F (cropped region indicated)

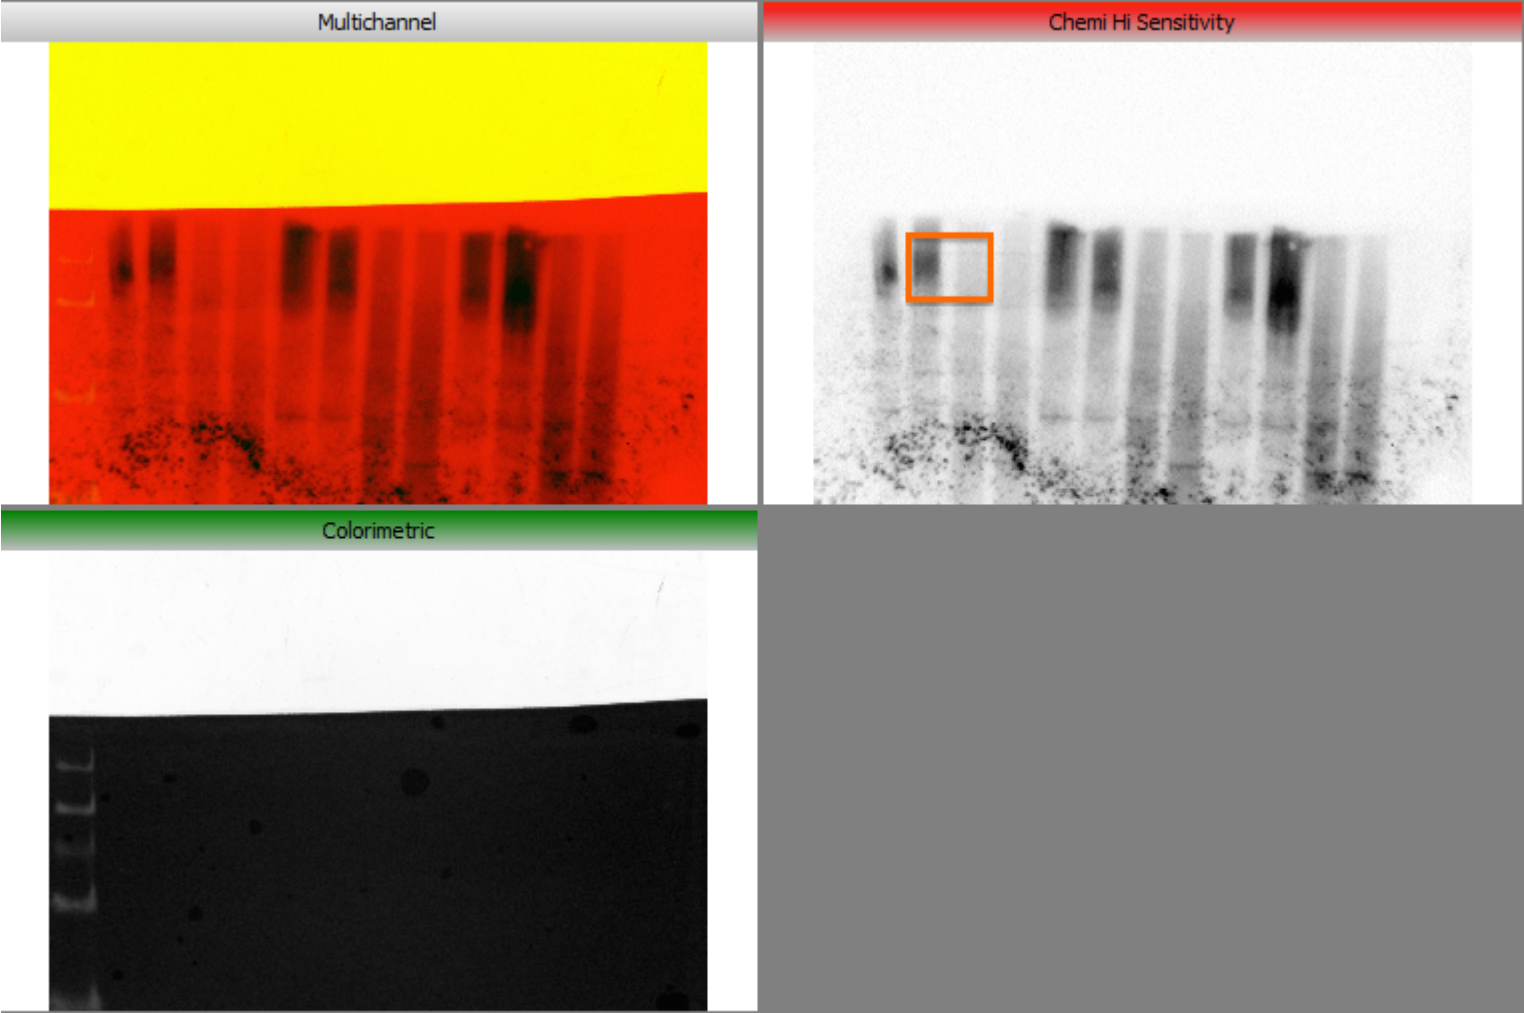

Anti NLRP3

Source data Figure 1I (cropped region indicated)

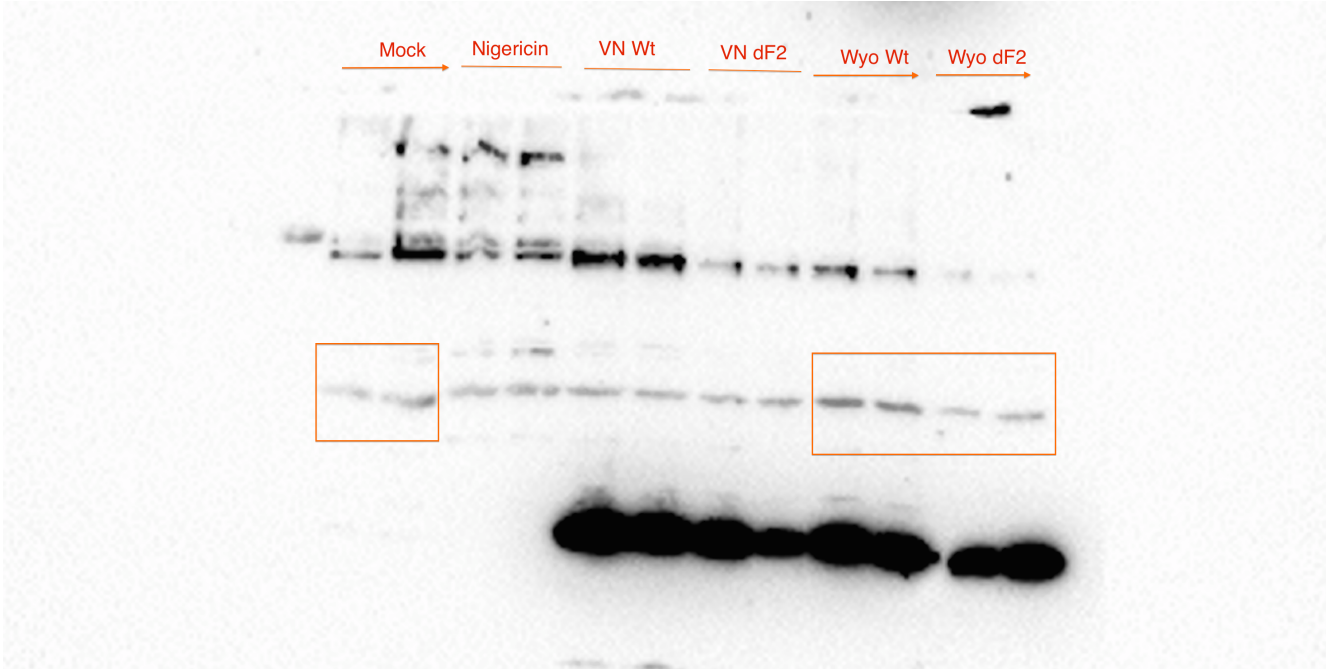

Anti beta actin



Source data Figure 1I (cropped region indicated)

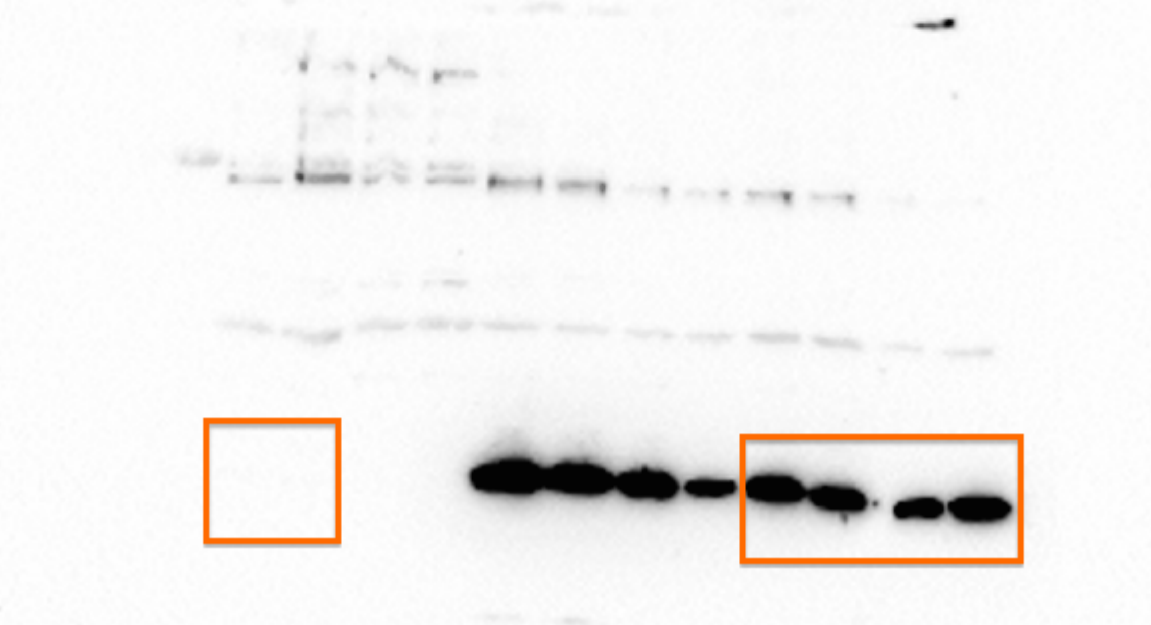

Anti M1
