# Supplementary material
Source: PubMed Central journal article supplement (PMC7726813)
Supplement: EMBR-21-e50421-s004.pdf [file EMBR-21-e50421-s004.pdf]

# Source data Figure 3A (cropped region indicated)

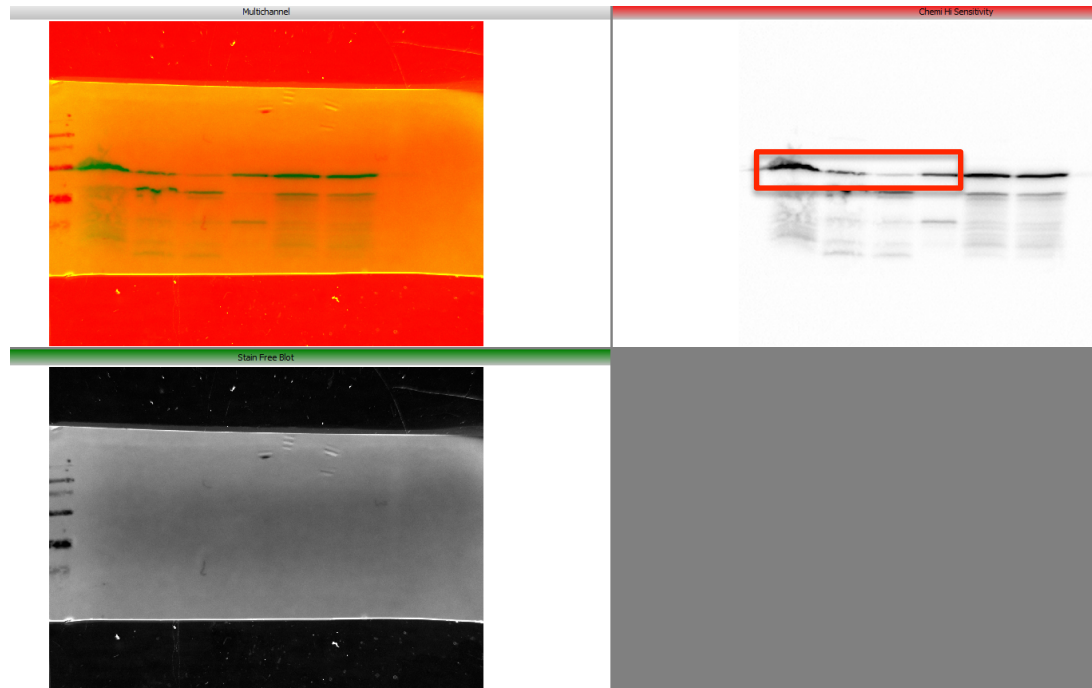

Anti gasdermin D

Source data Figure 3A (cropped region indicated)

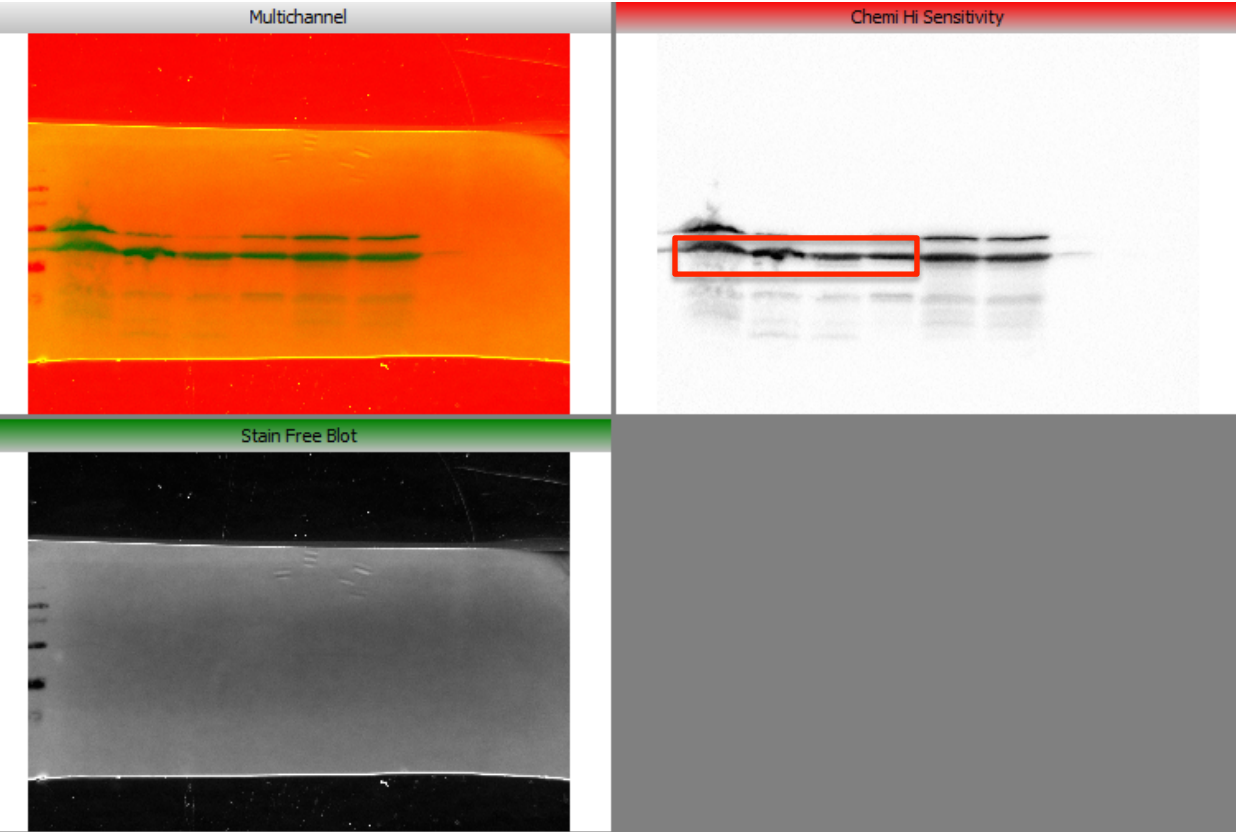

Anti betaactin

Source data Figure 3C (cropped region indicated)

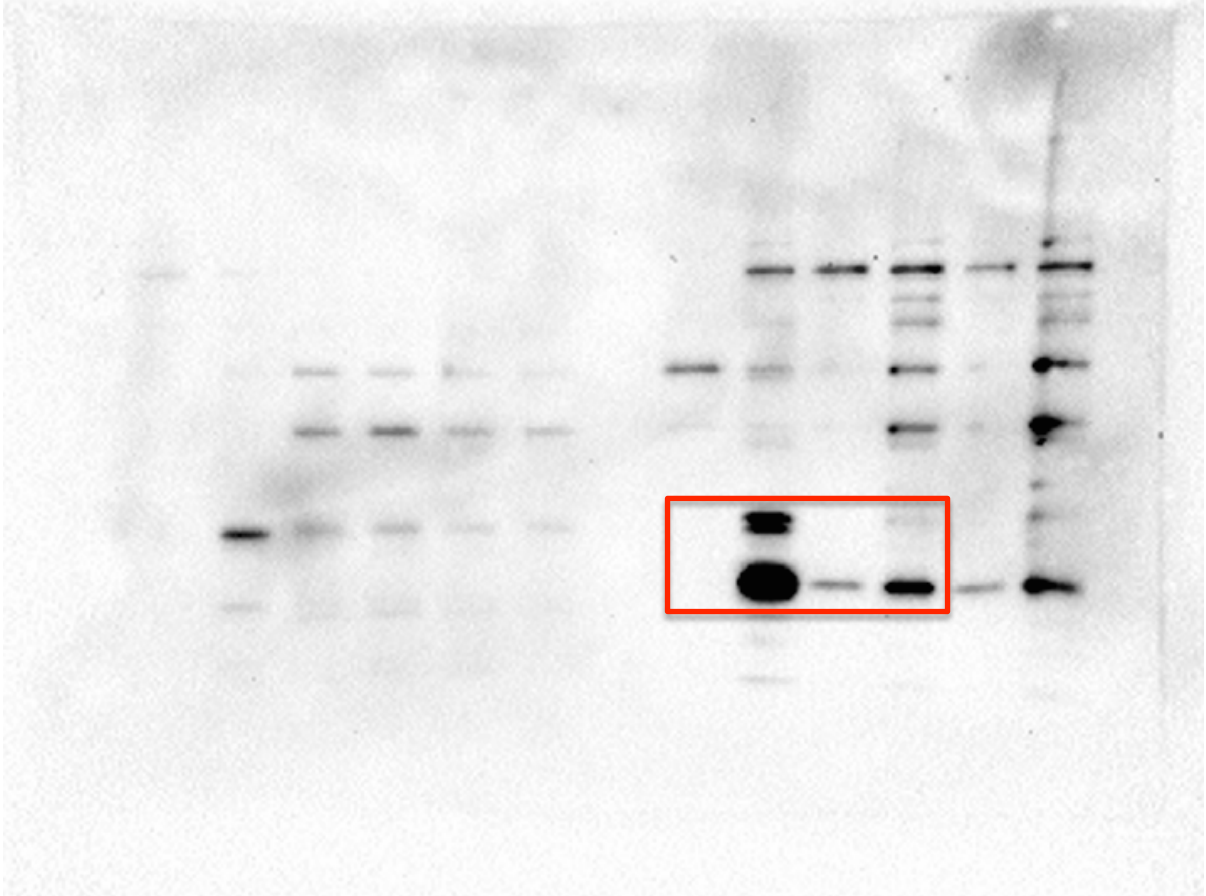

Anti gasdermin D

Source data Figure 3F (cell) (cropped region indicated)

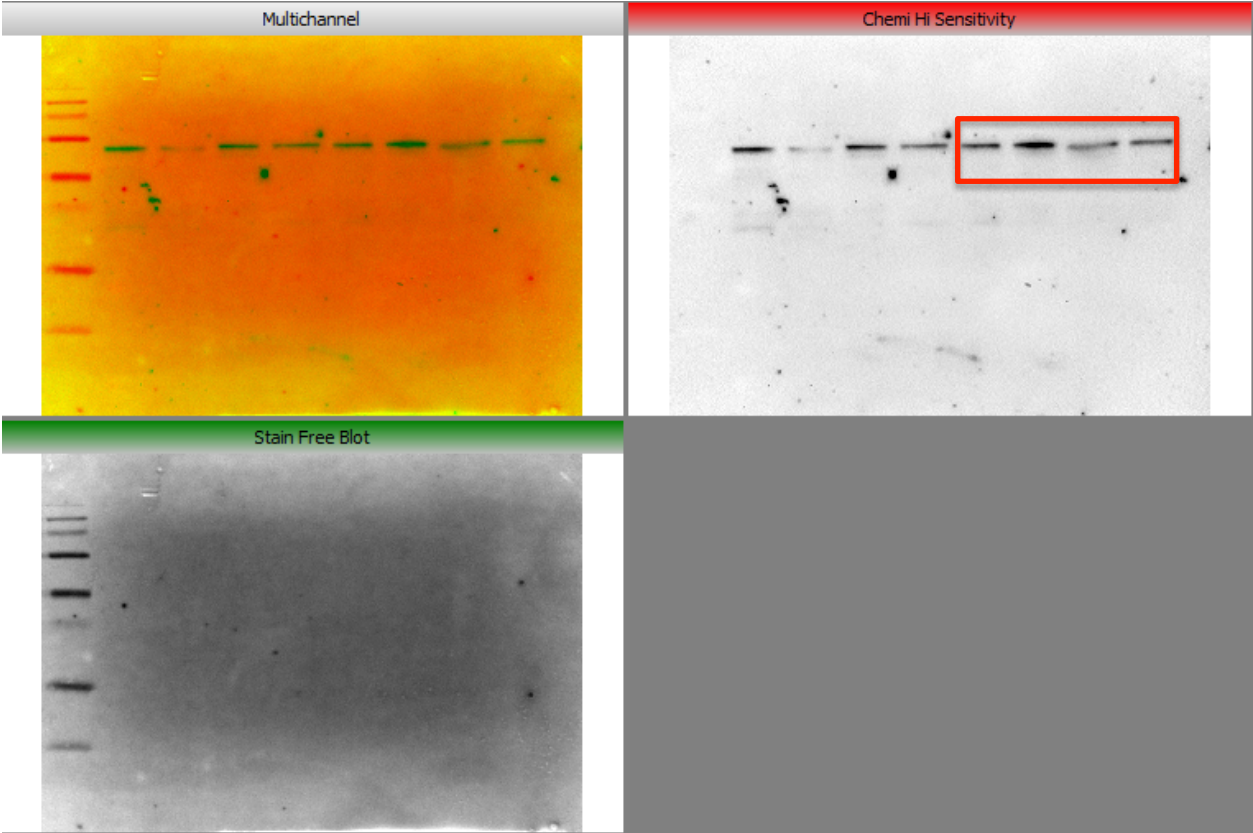

Anti caspase 1

Source data Figure 3F (cell) (cropped region indicated)

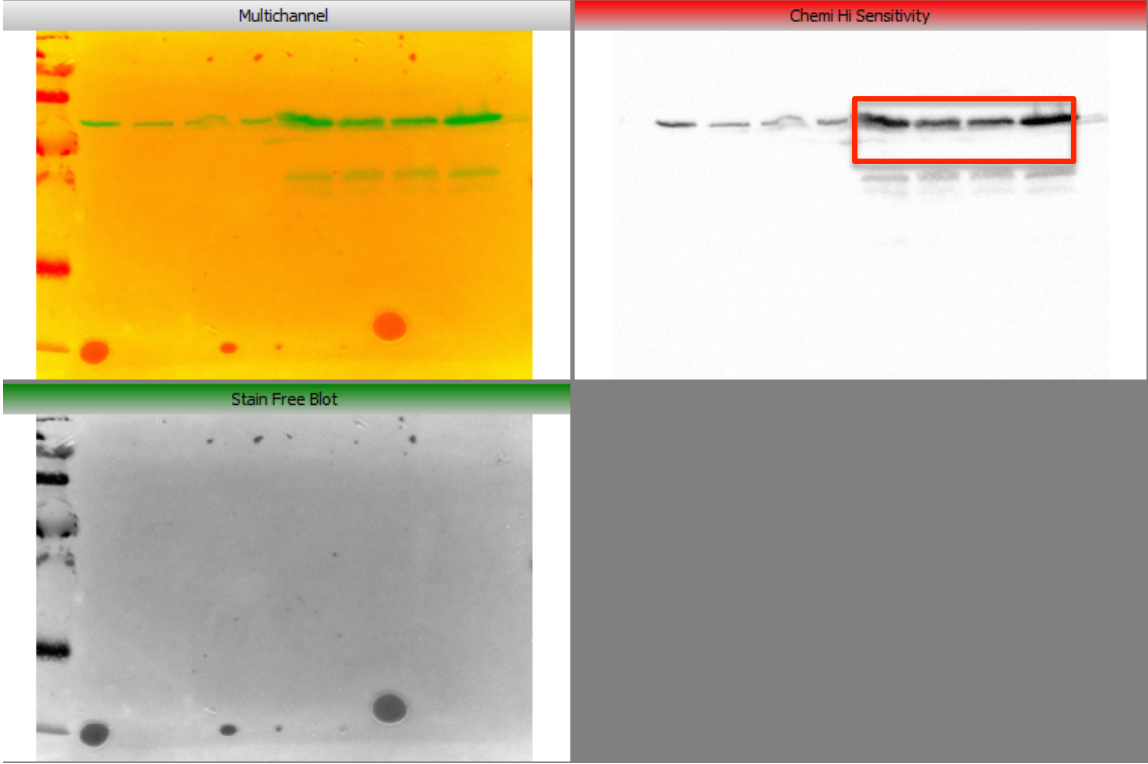

Anti beta actin

Source data Figure 3F (SN) (cropped region indicated)

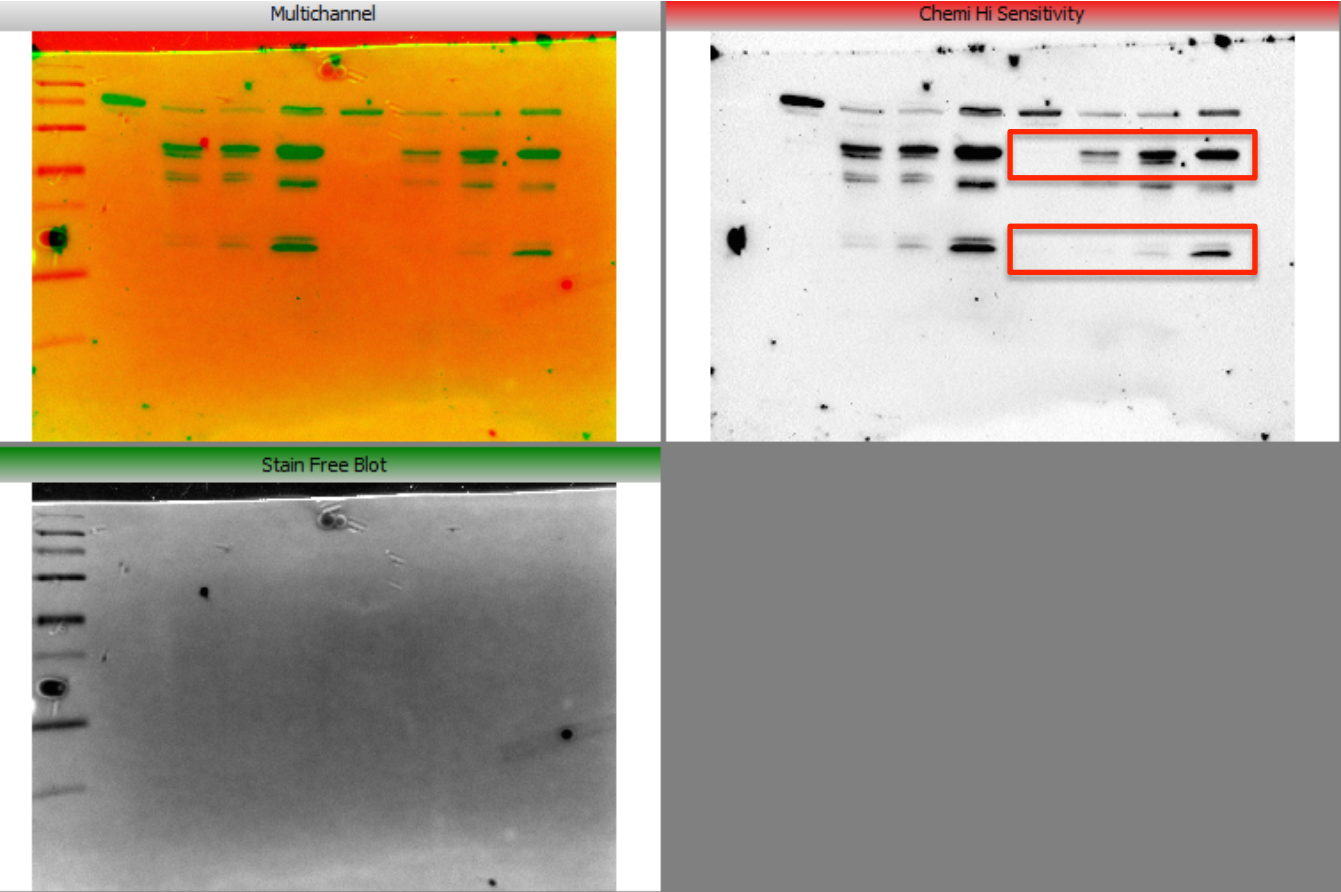

Anti caspase 1
