# Supplementary material
Source: PubMed Central journal article supplement (PMC7726813)
Supplement: EMBR-21-e50421-s005.pdf [file EMBR-21-e50421-s005.pdf]

Source data Figure 4A (Input) (cropped region indicated)

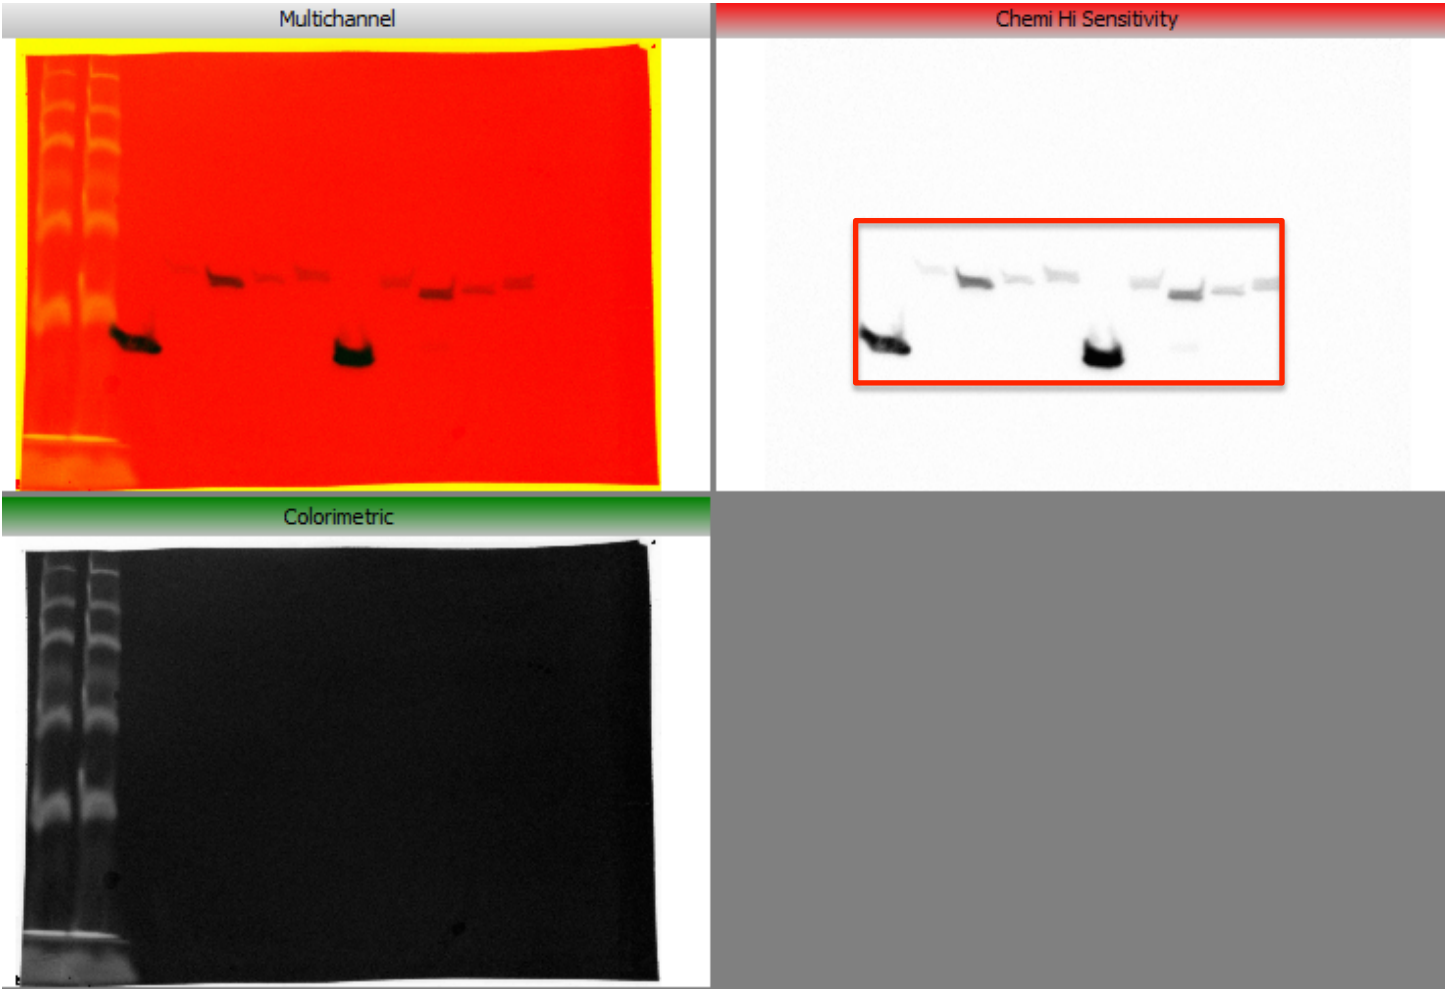

Anti Flag

Source data Figure 4A (Input) (cropped region indicated)

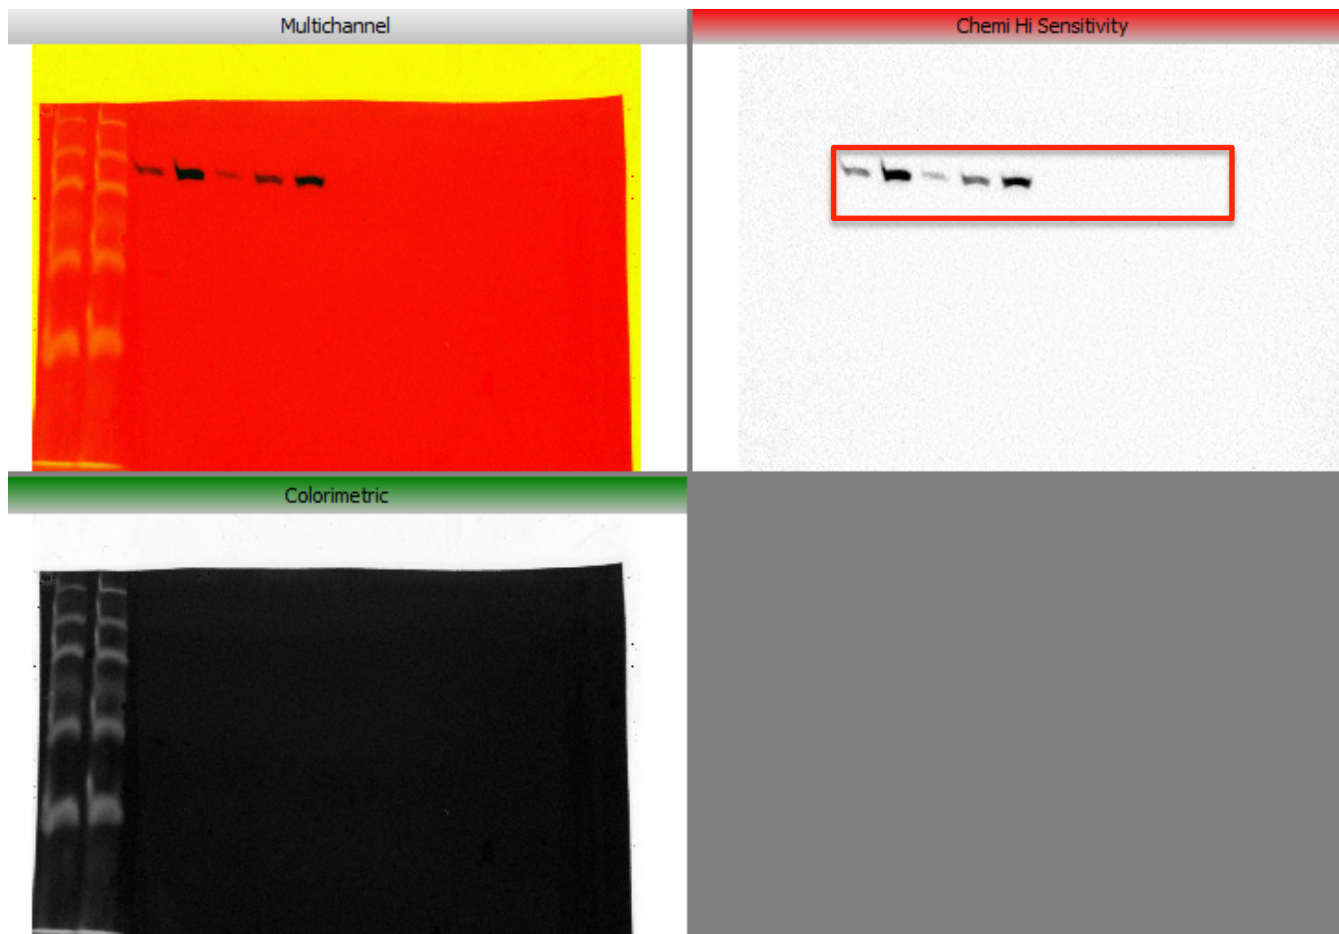

Anti V5

Source data Figure 4A (Input) (cropped region indicated)

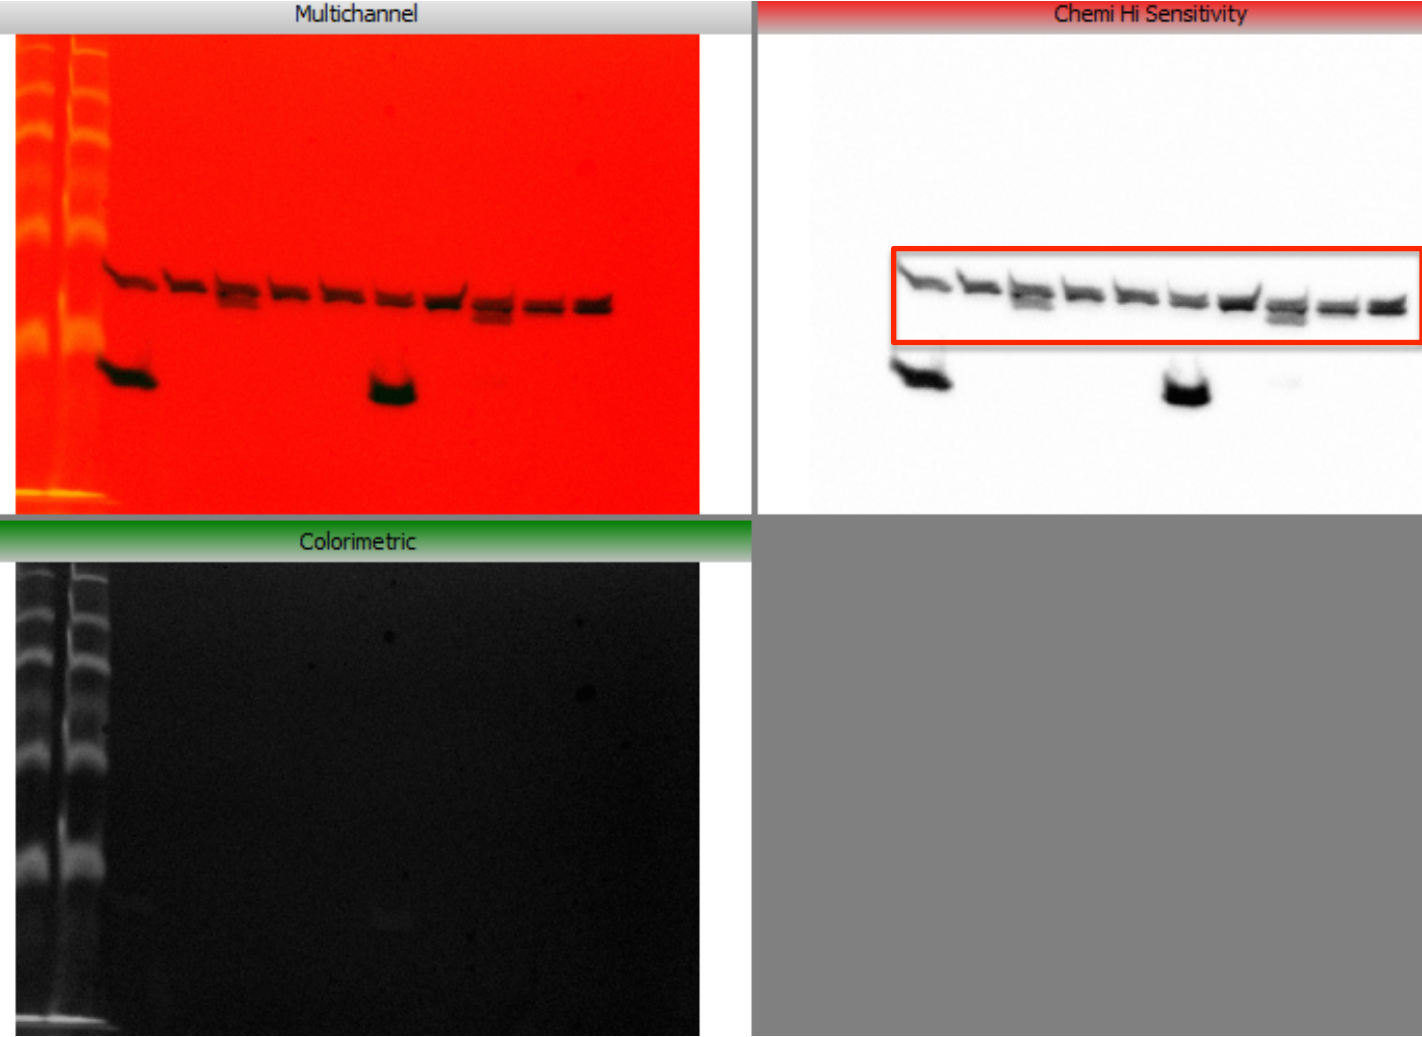

Anti beta actin

Source data Figure 4A (IP) (cropped region indicated)

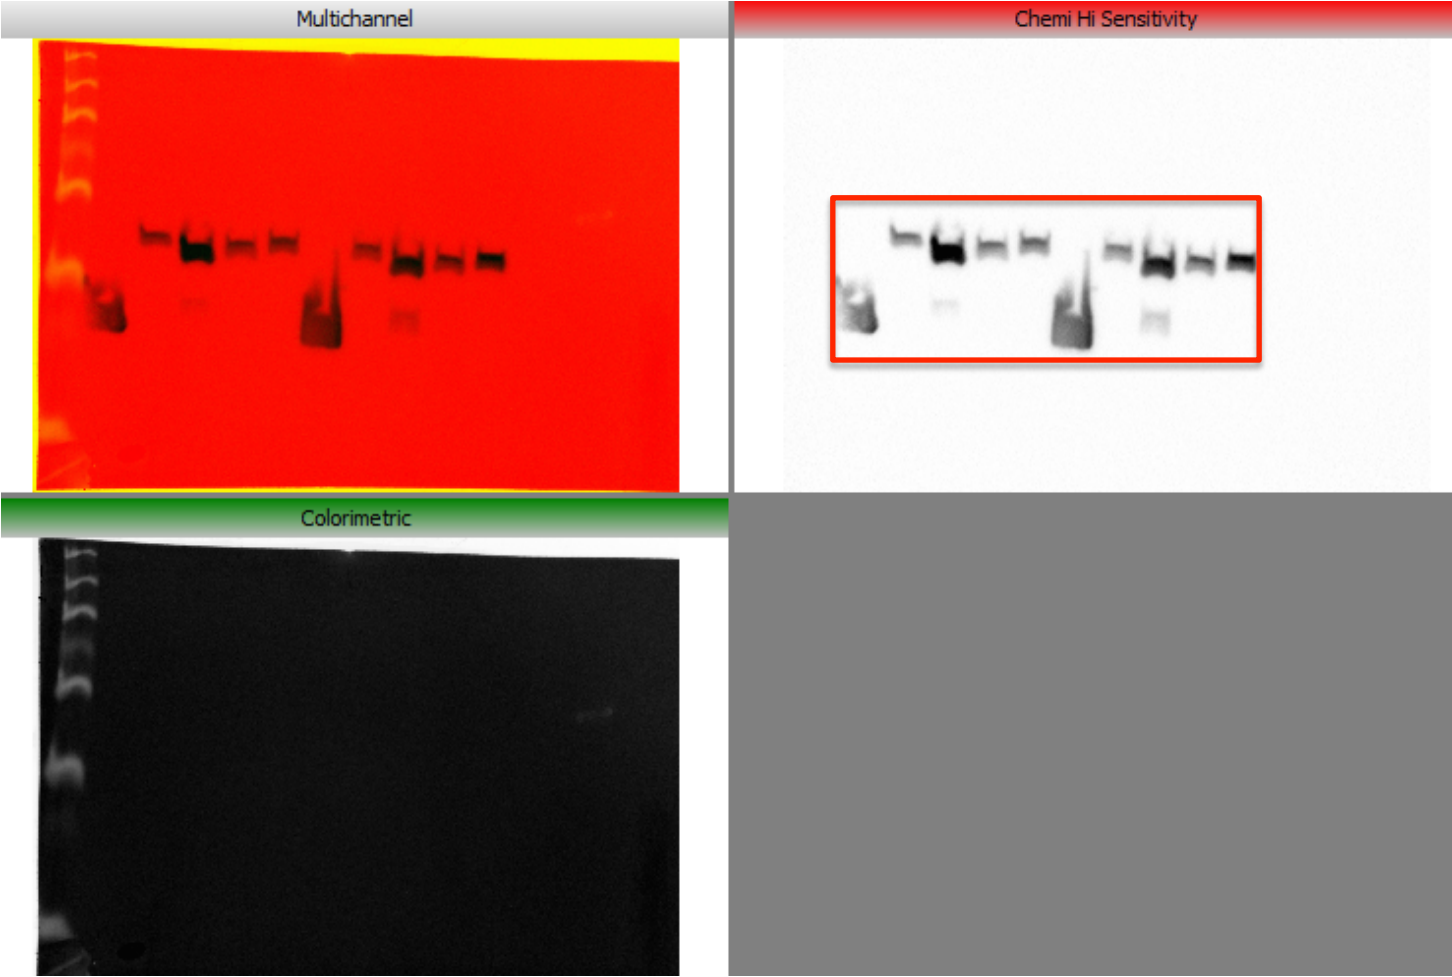

Anti Flag

Source data Figure 4A (IP) (cropped region indicated)

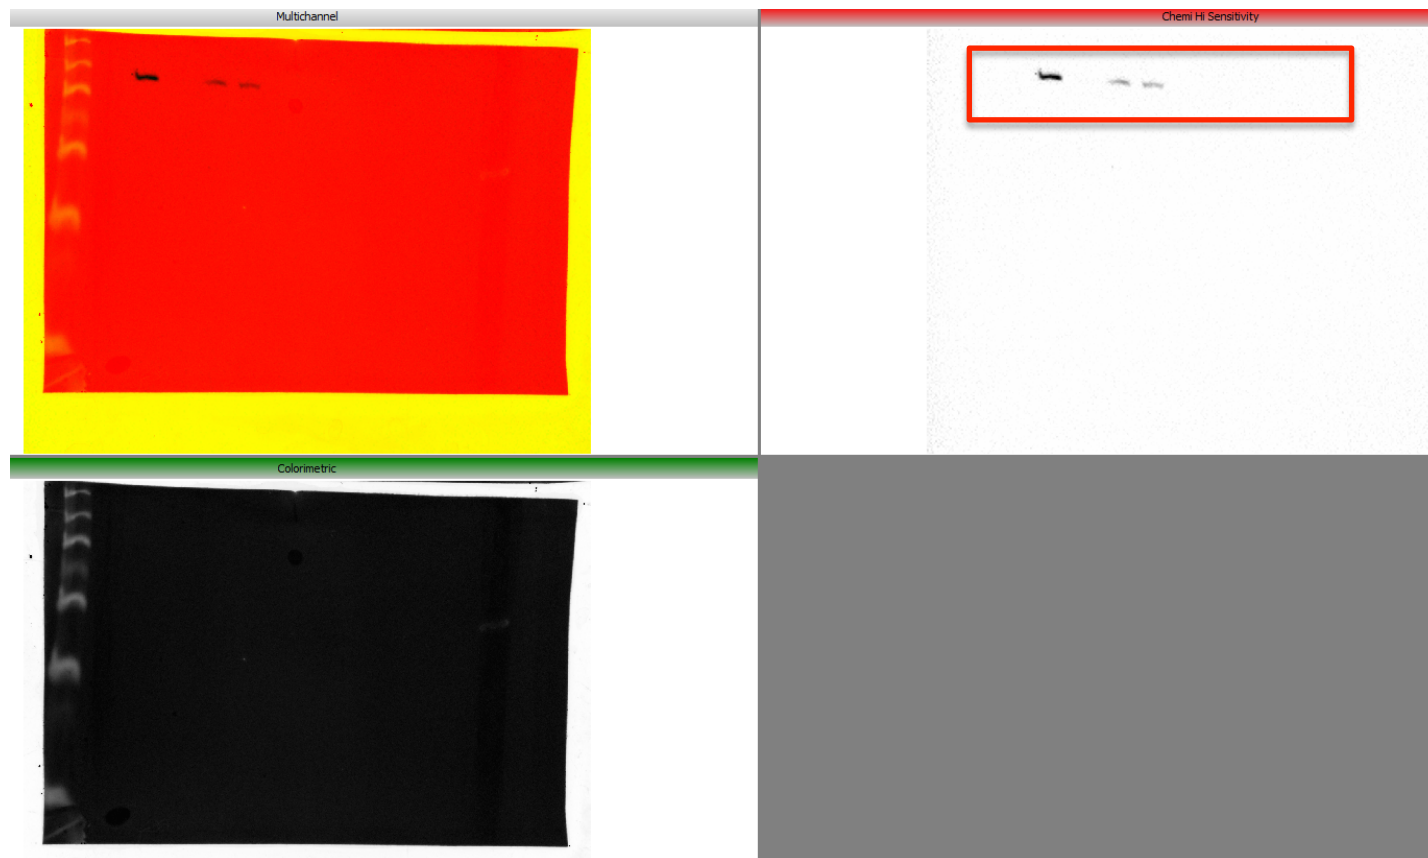

Anti V5

Source data Figure 4E (Input) (cropped region indicated)

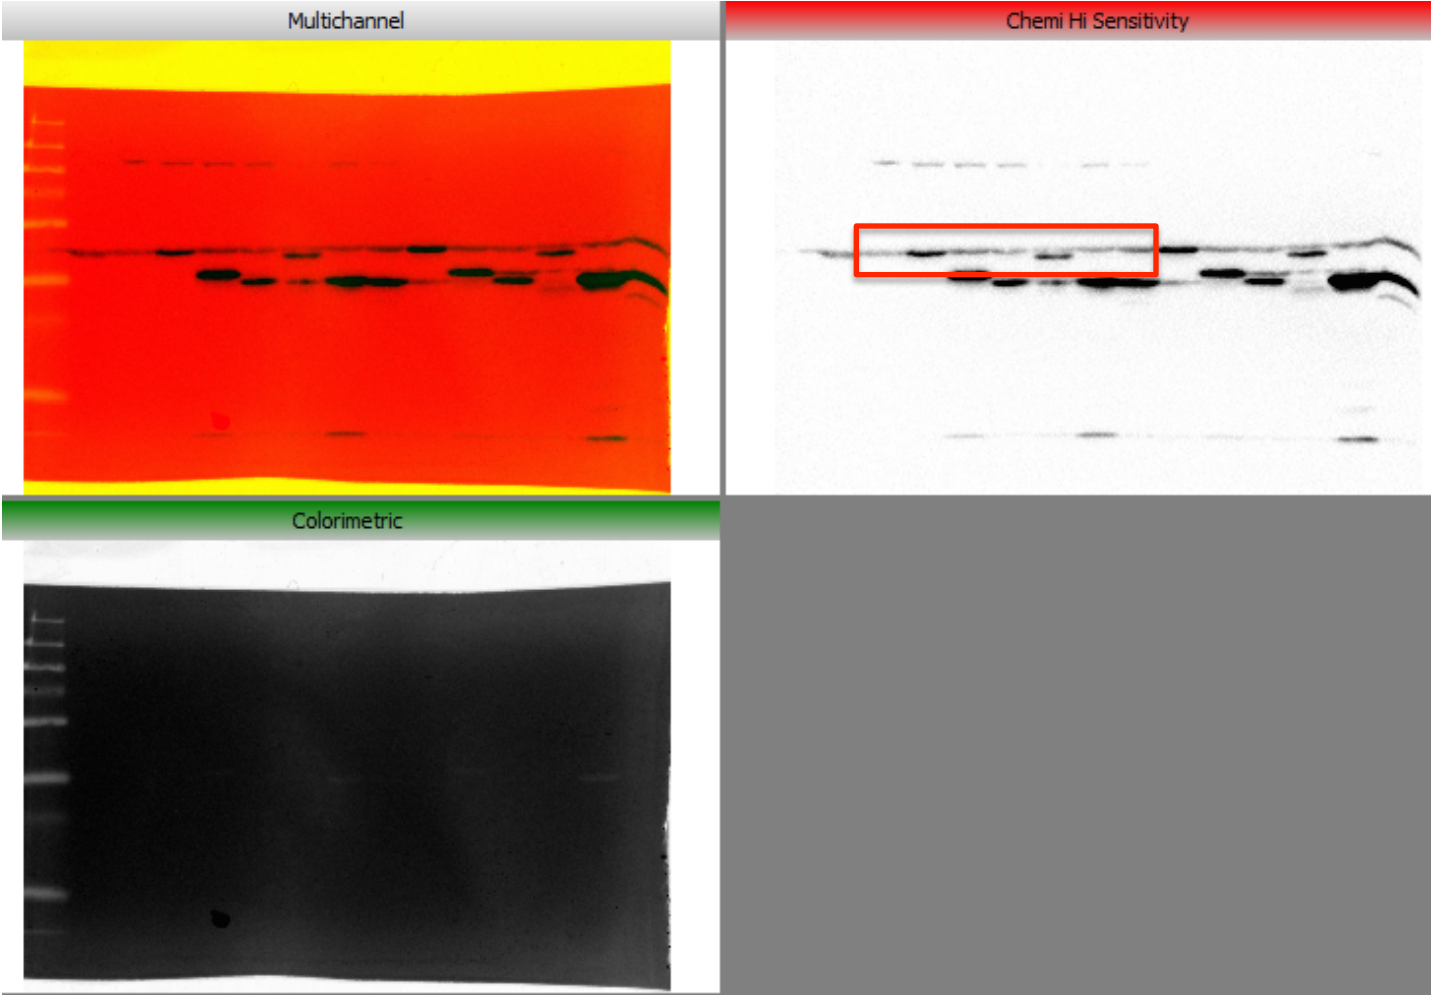

Anti Actin

Source data Figure 4E (input/IP) (cropped region indicated)

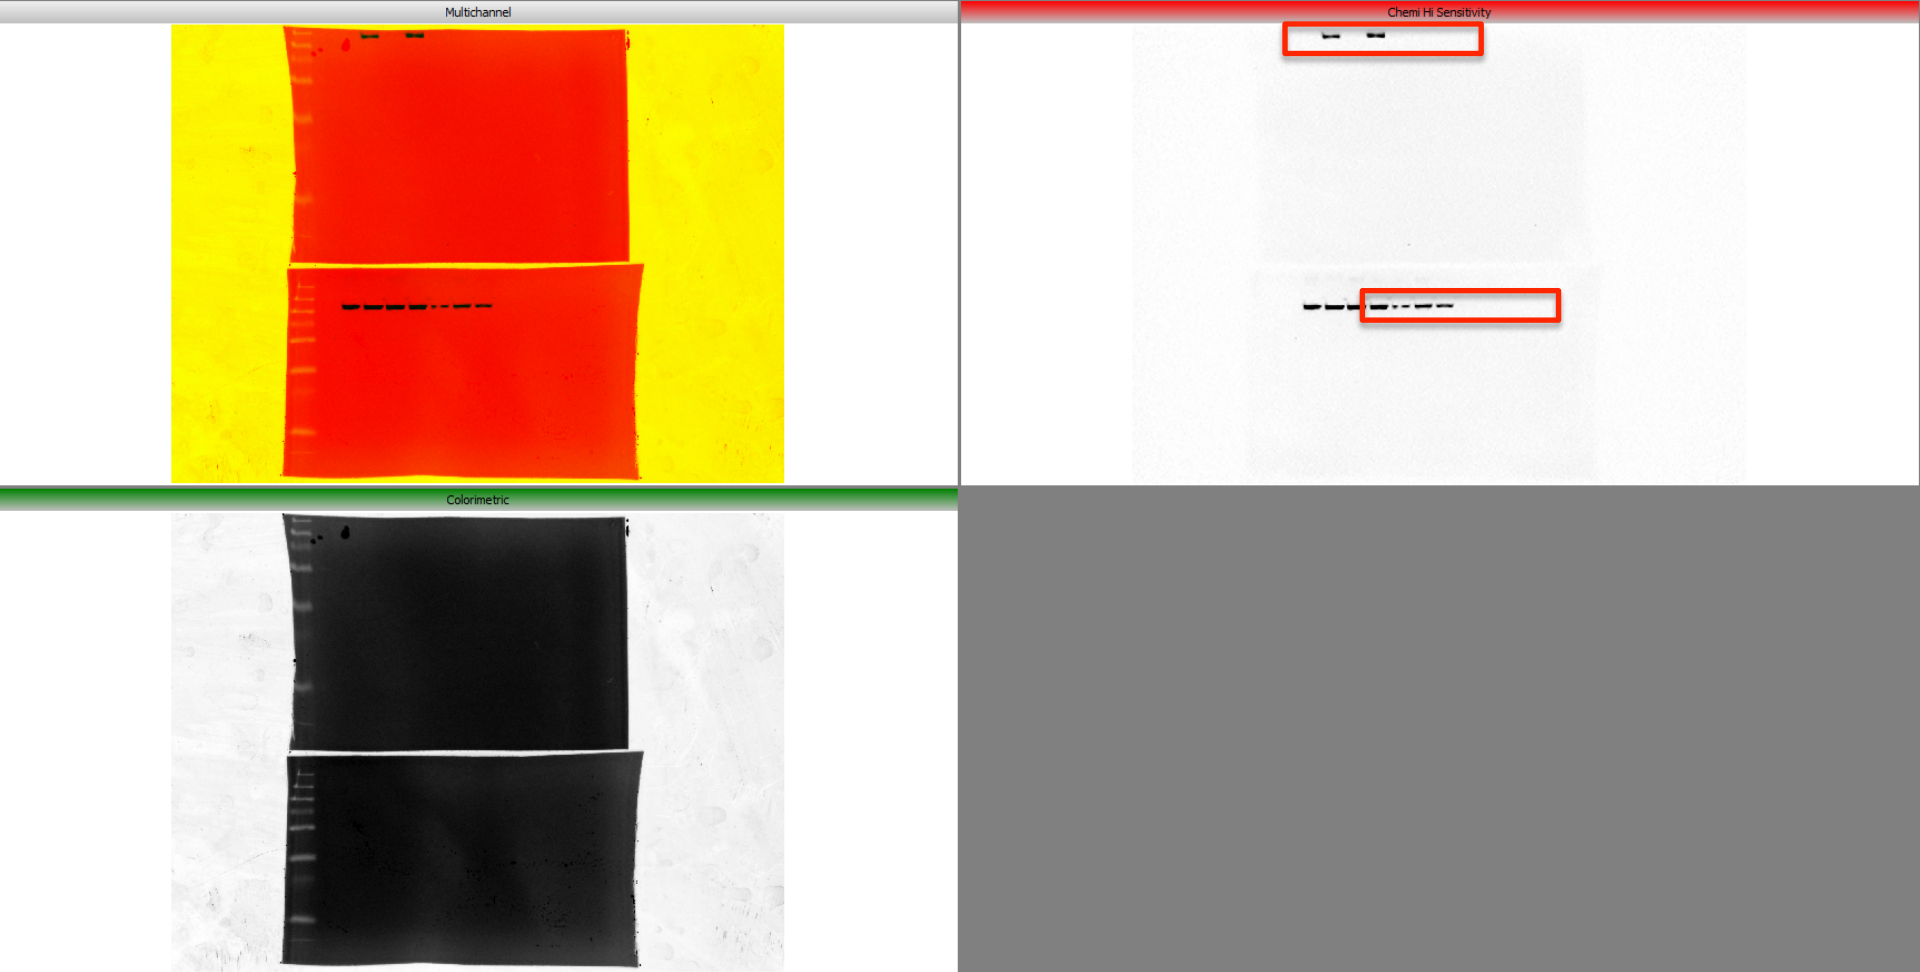

Anti NLRP3

Source data Figure 4E (Input/IP) (cropped region indicated)

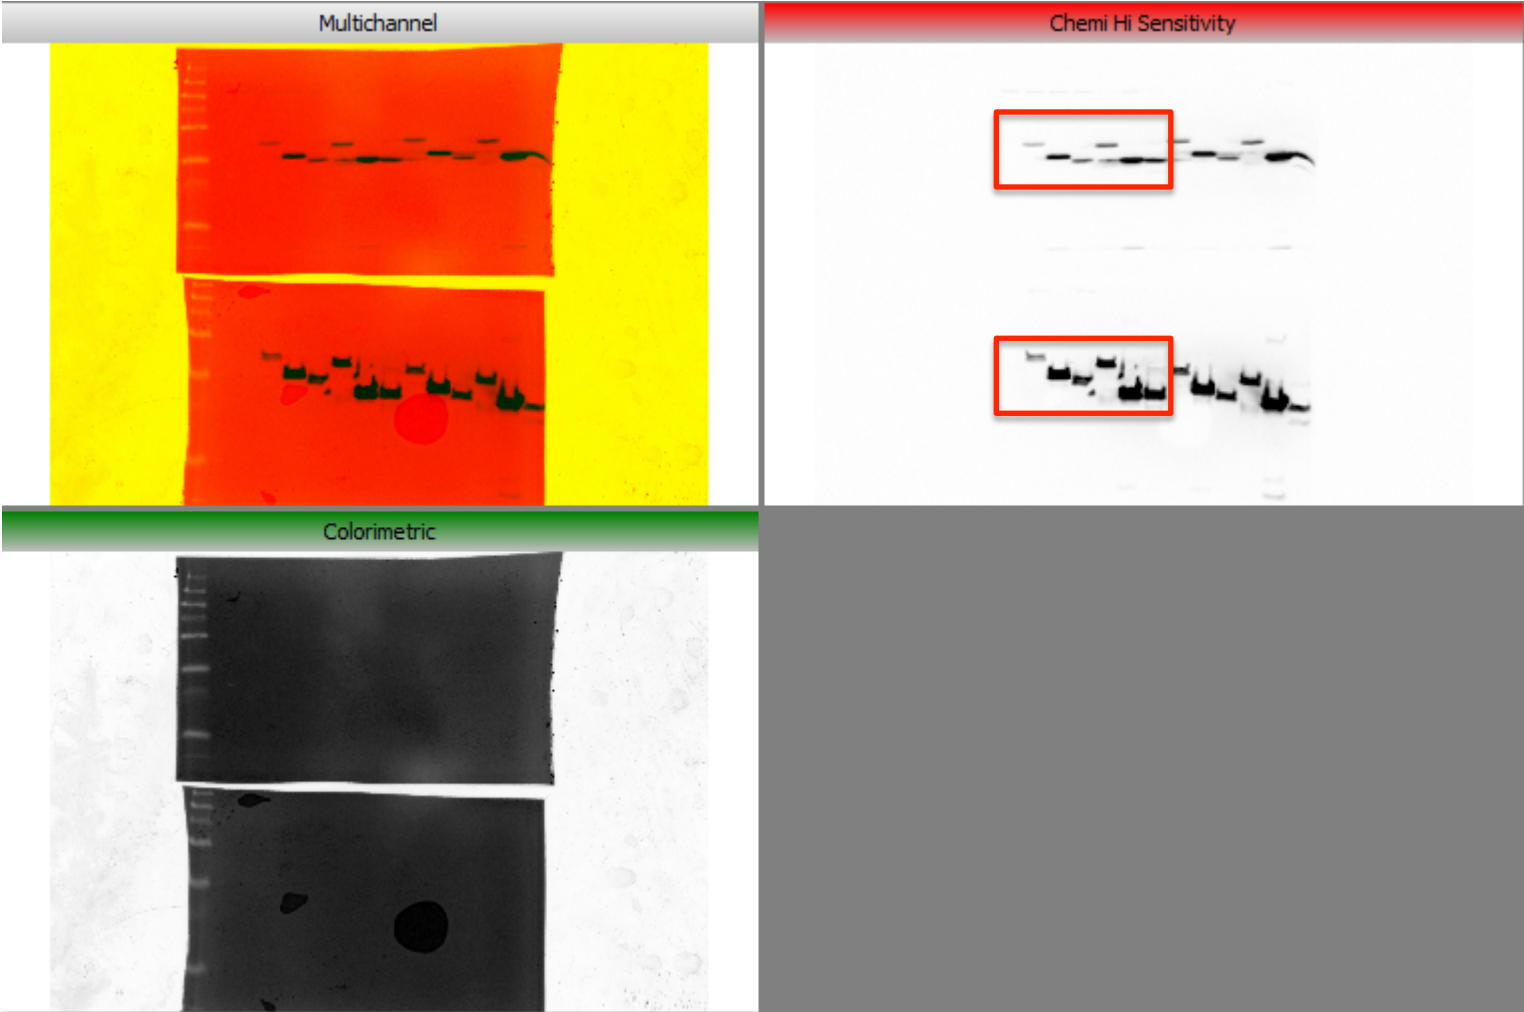

Anti PB1-F2
