# Supplementary material
Source: PubMed Central journal article supplement (PMC7726813)
Supplement: EMBR-21-e50421-s006.pdf [file EMBR-21-e50421-s006.pdf]

Source data Figure 5B (IP) (cropped region indicated)

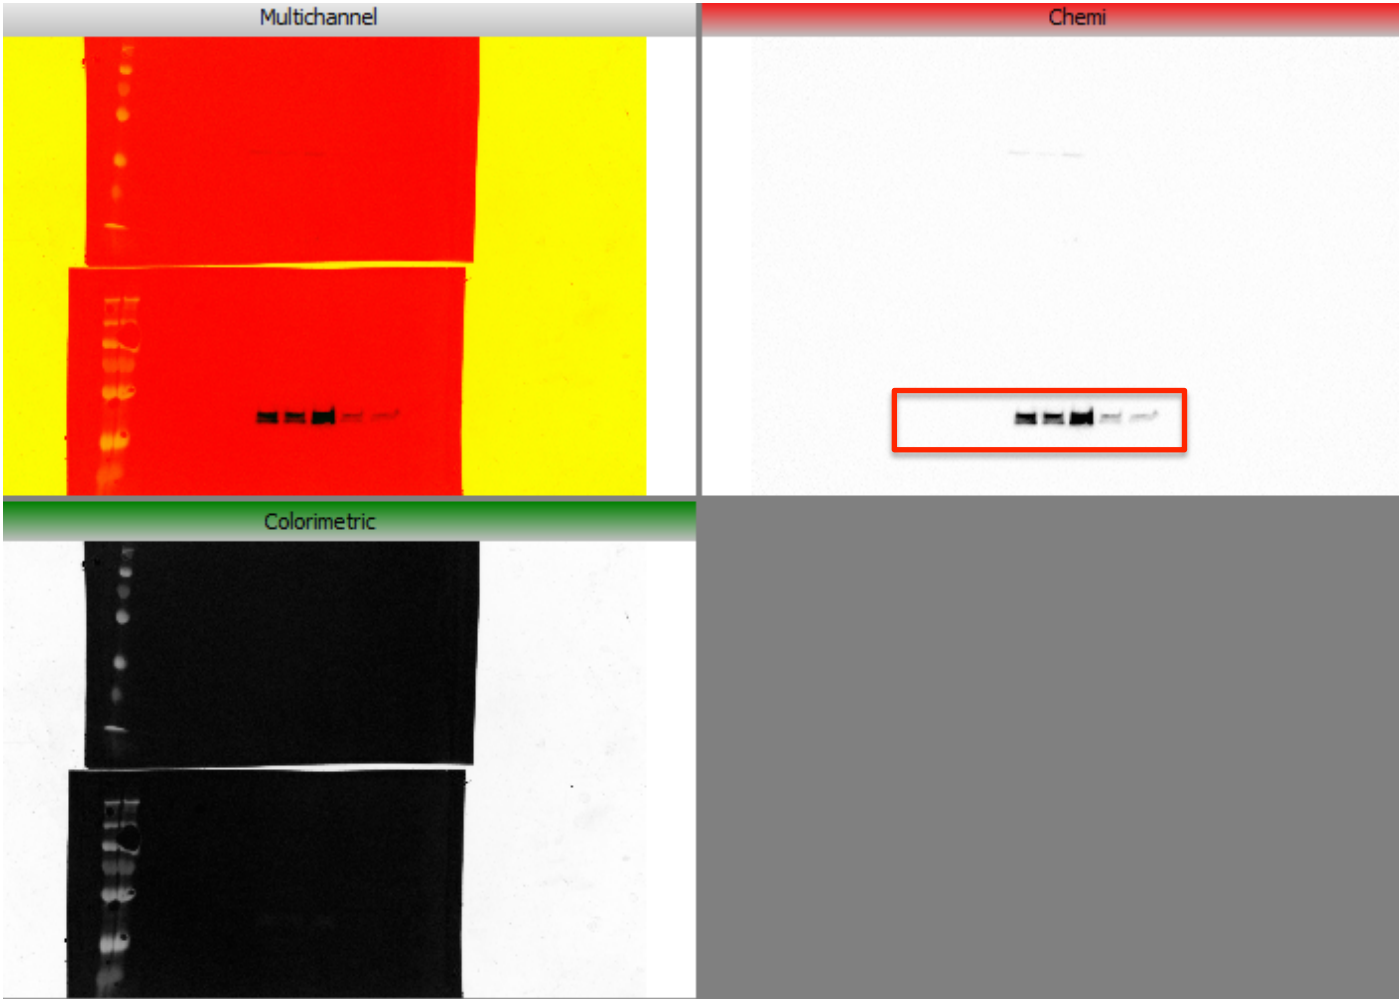

Anti Flag

Source data Figure 5B (Input) (cropped region indicated)

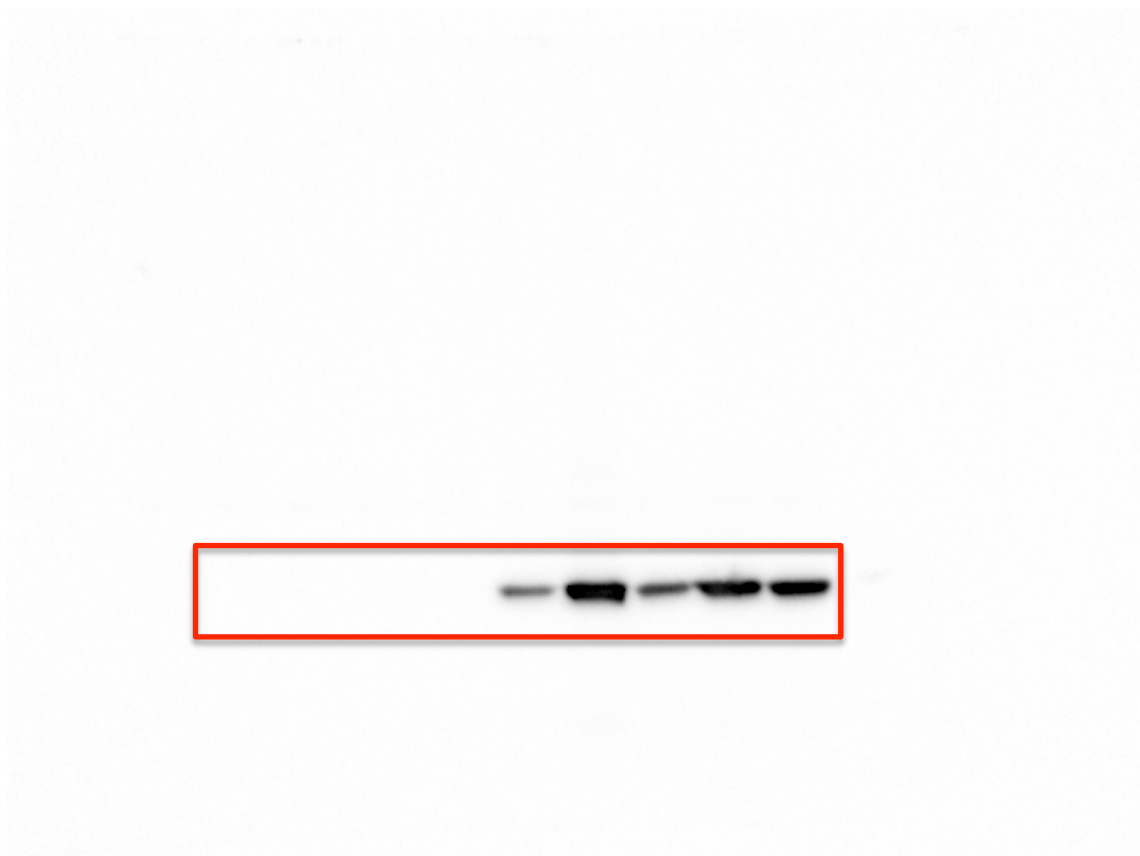

Anti Flag

Source data Figure 5B (Input) (cropped region indicated)

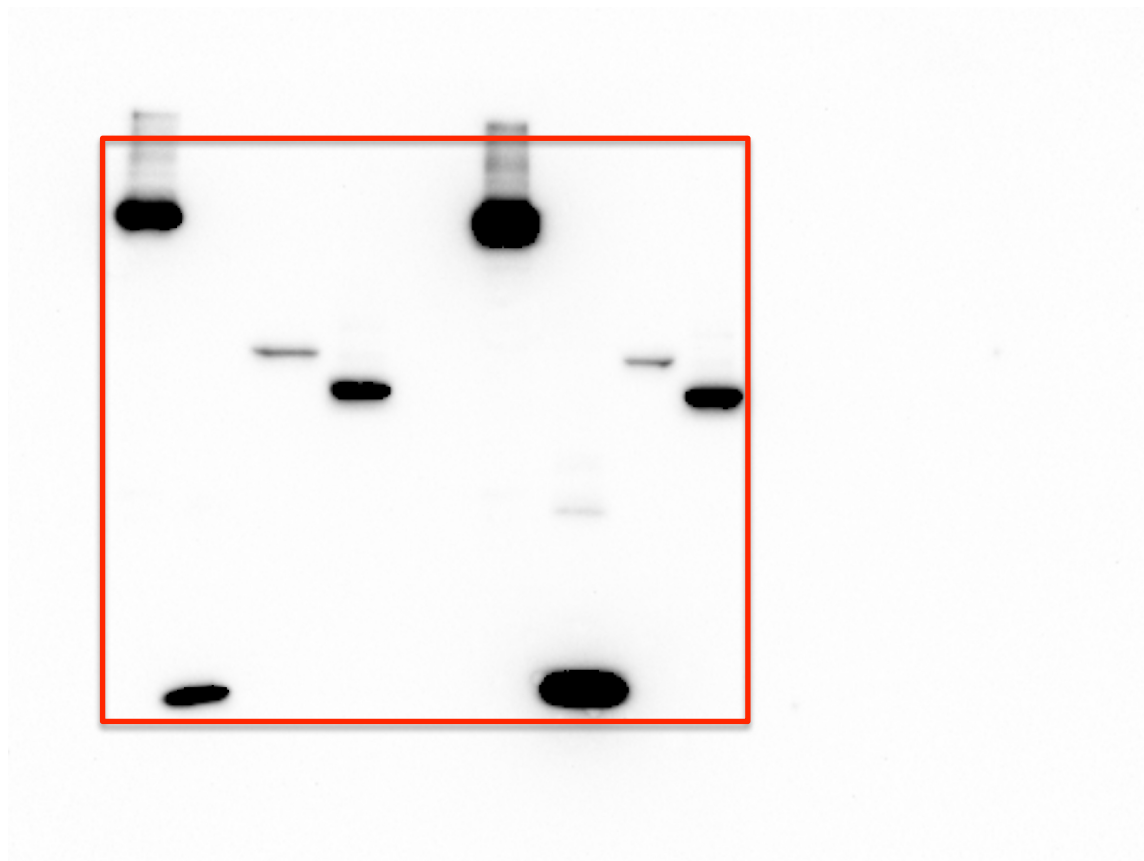

Anti V5

Source data Figure 5B (Input) (cropped region indicated)

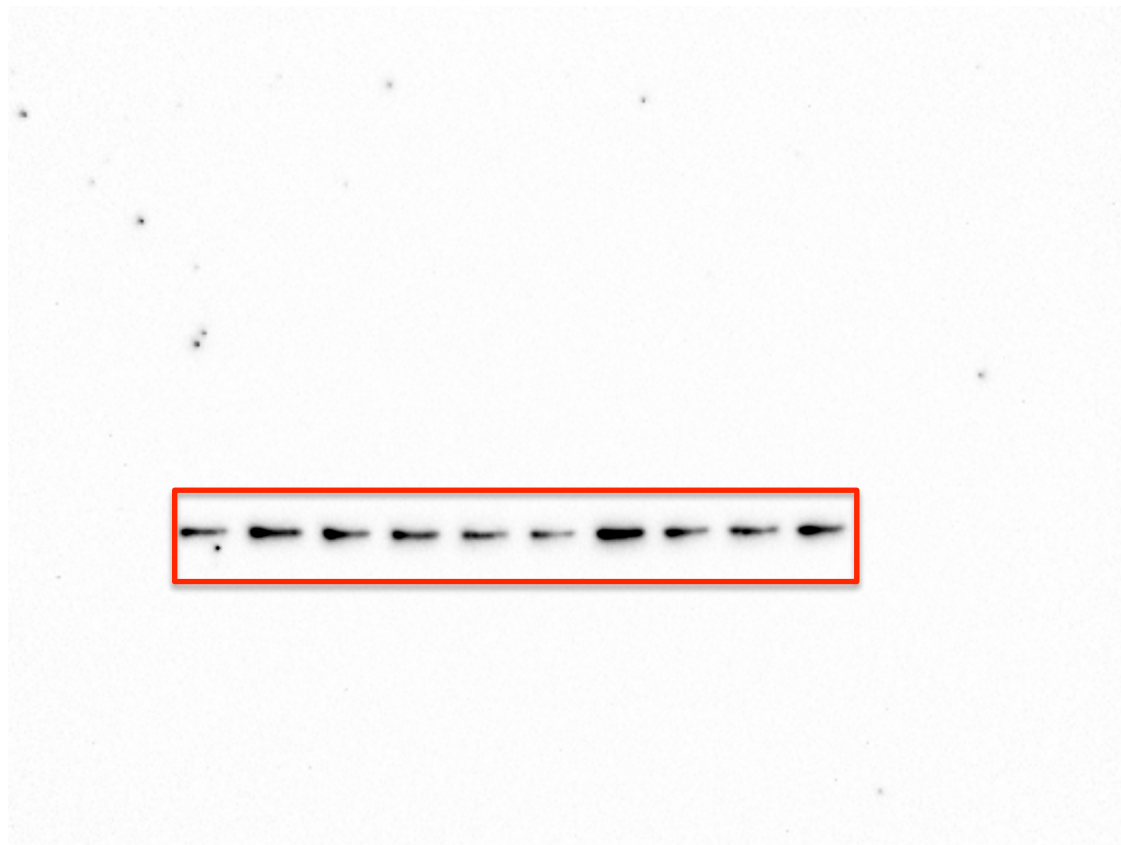

Anti Tubulin

Source data Figure 5B (IP) (cropped region indicated)

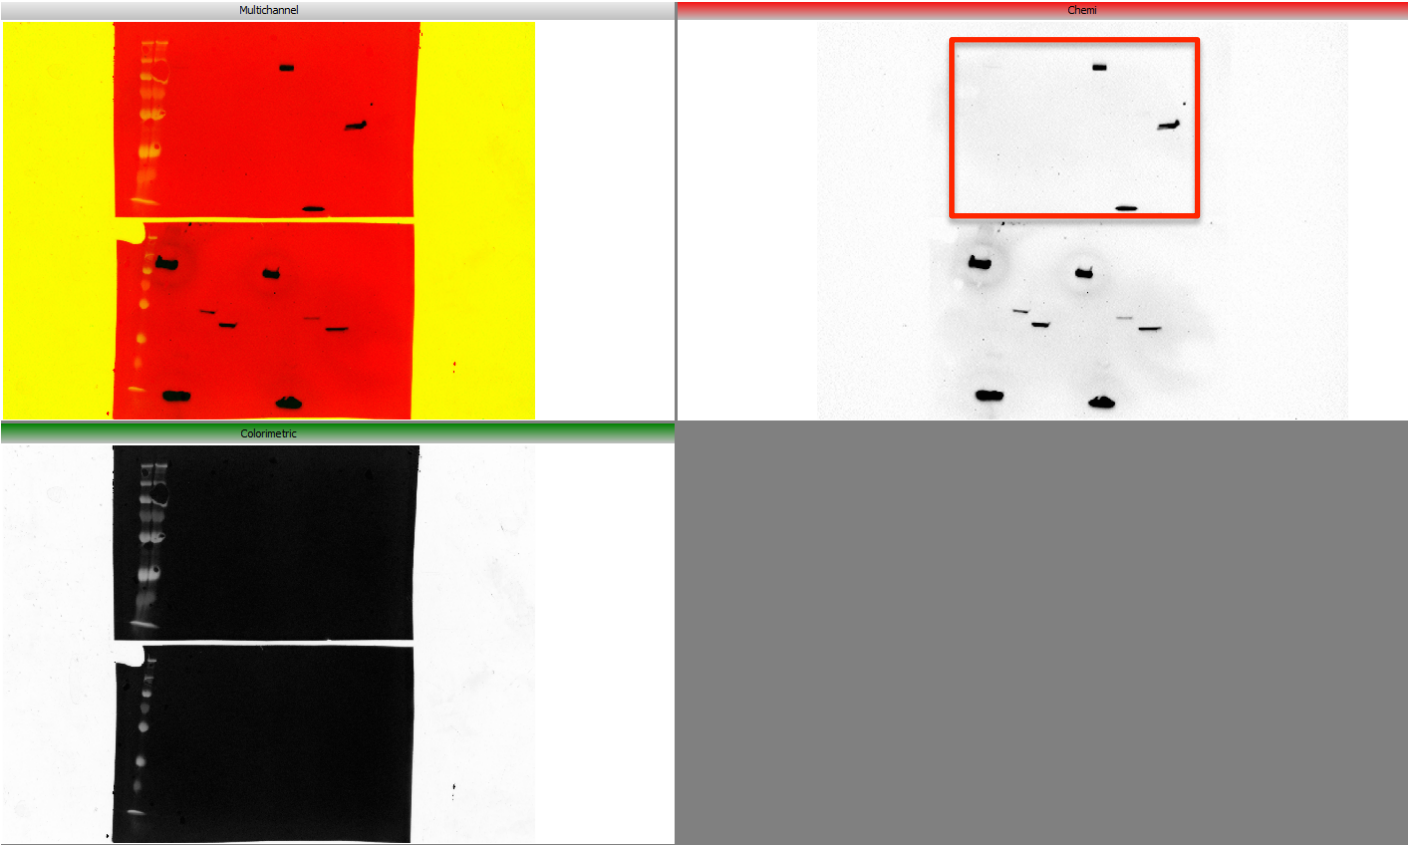

Anti V5

Source data Figure 5C (Input) (cropped region indicated)

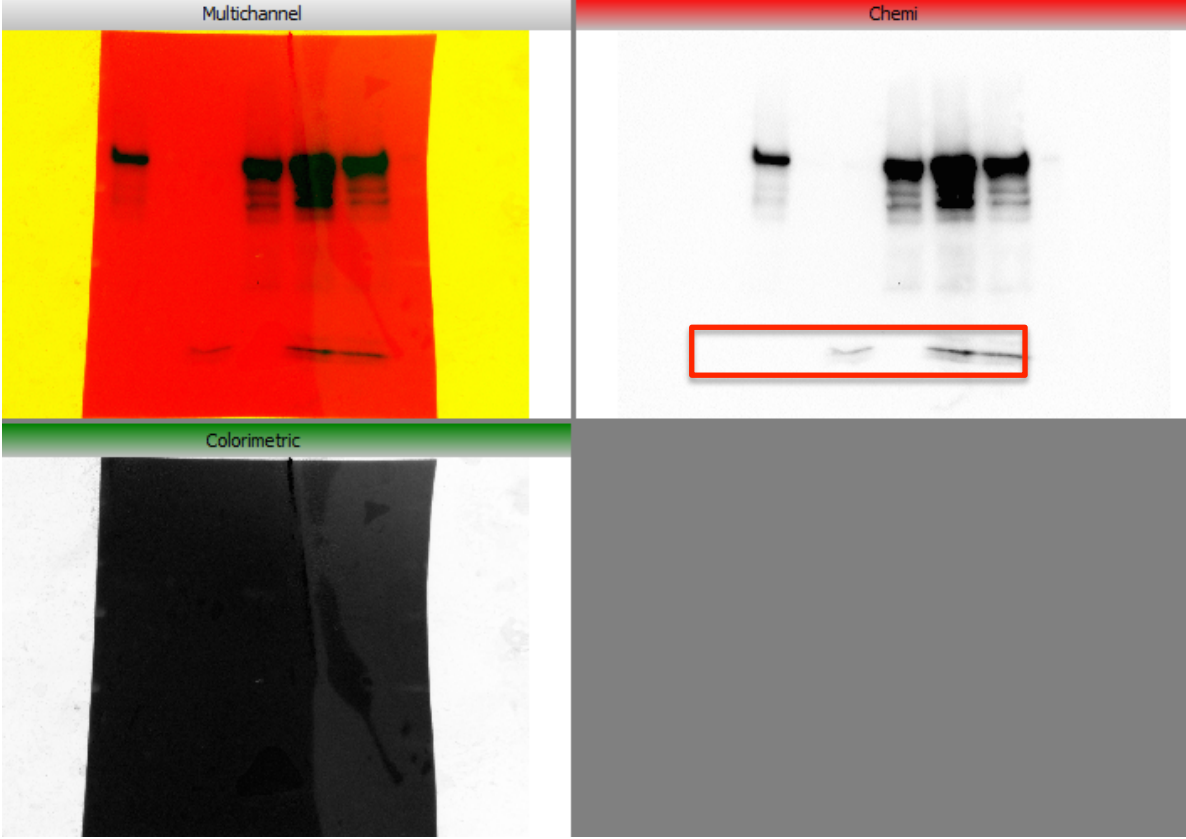

Anti V5

Source data Figure 5C (Input) (cropped region indicated)

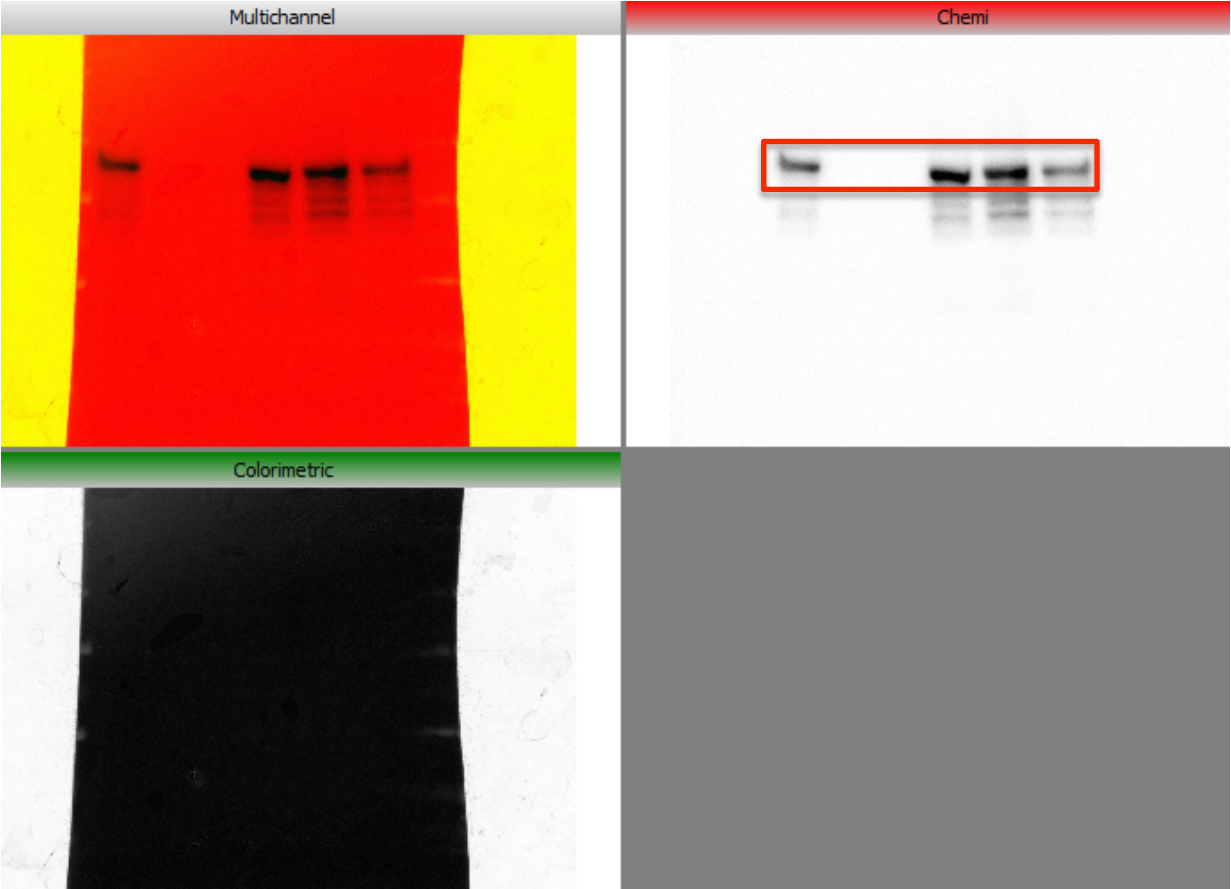

Anti NLRP3

Source data Figure 5C (Input) (cropped region indicated)

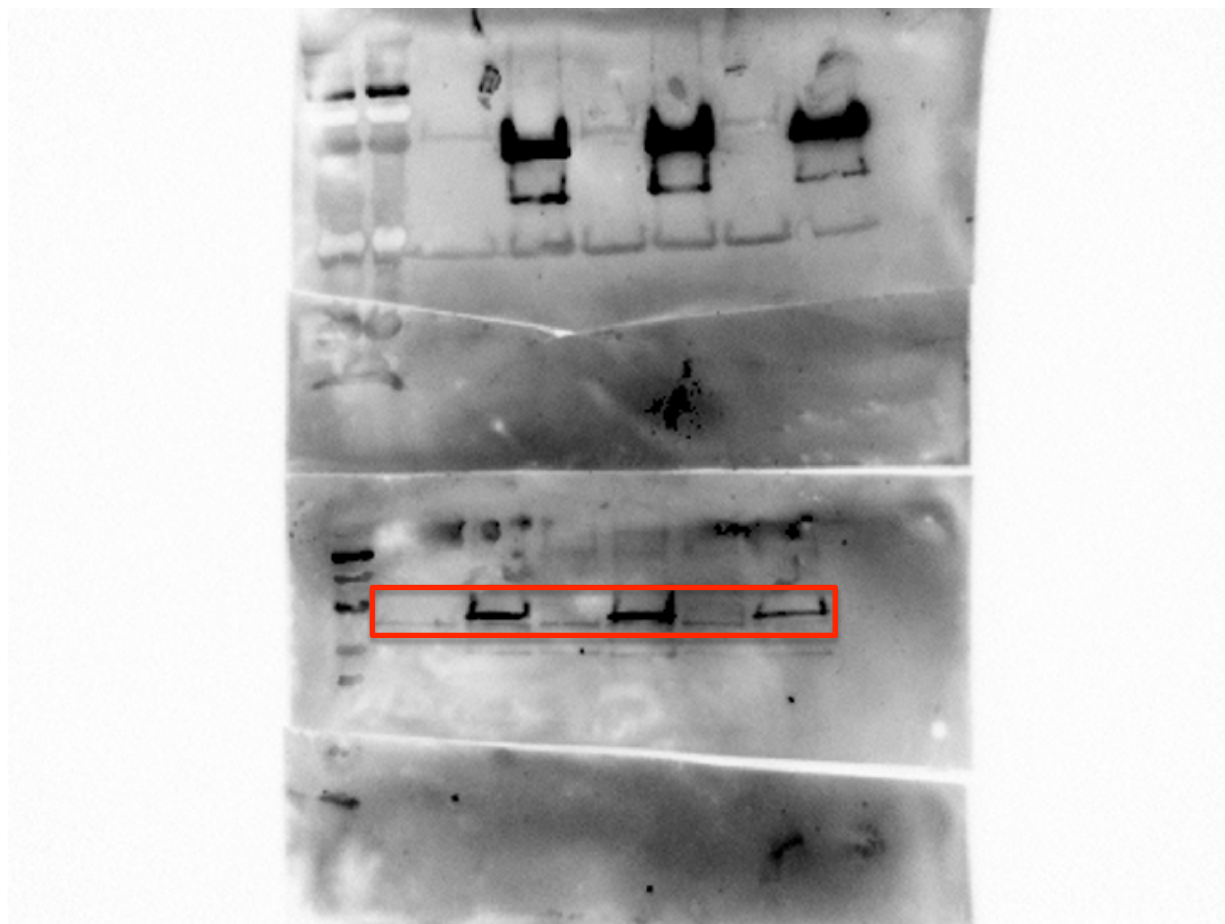

Anti Flag



Source data Figure 5C (Input) (cropped region indicated)

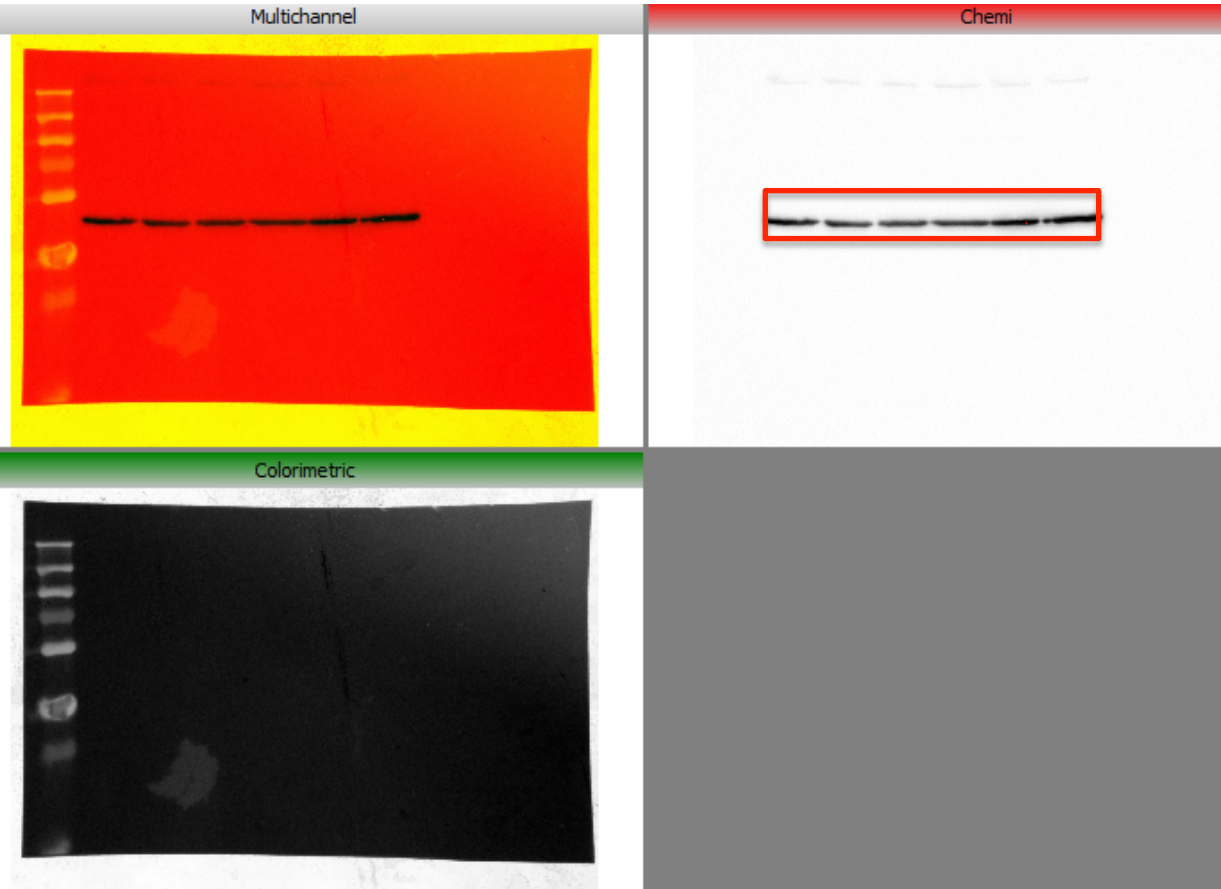

Anti beta actin

Source data Figure 5C (IP) (cropped region indicated)

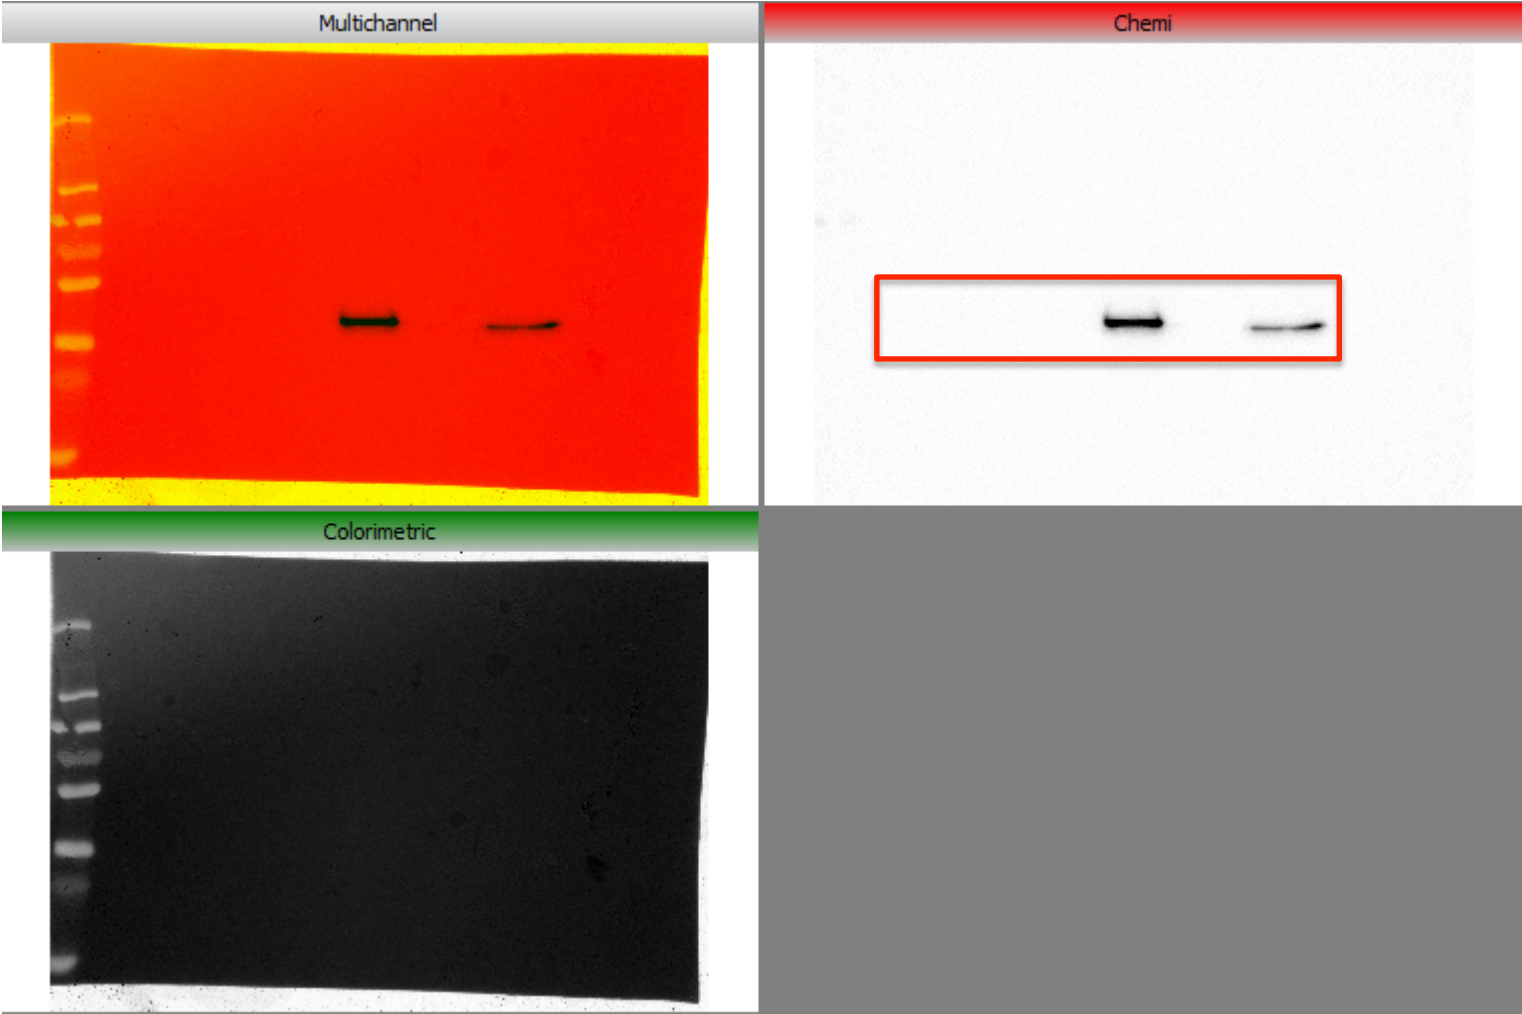

Anti PB1-F2

Source data Figure 5C (IP) (cropped region indicated)

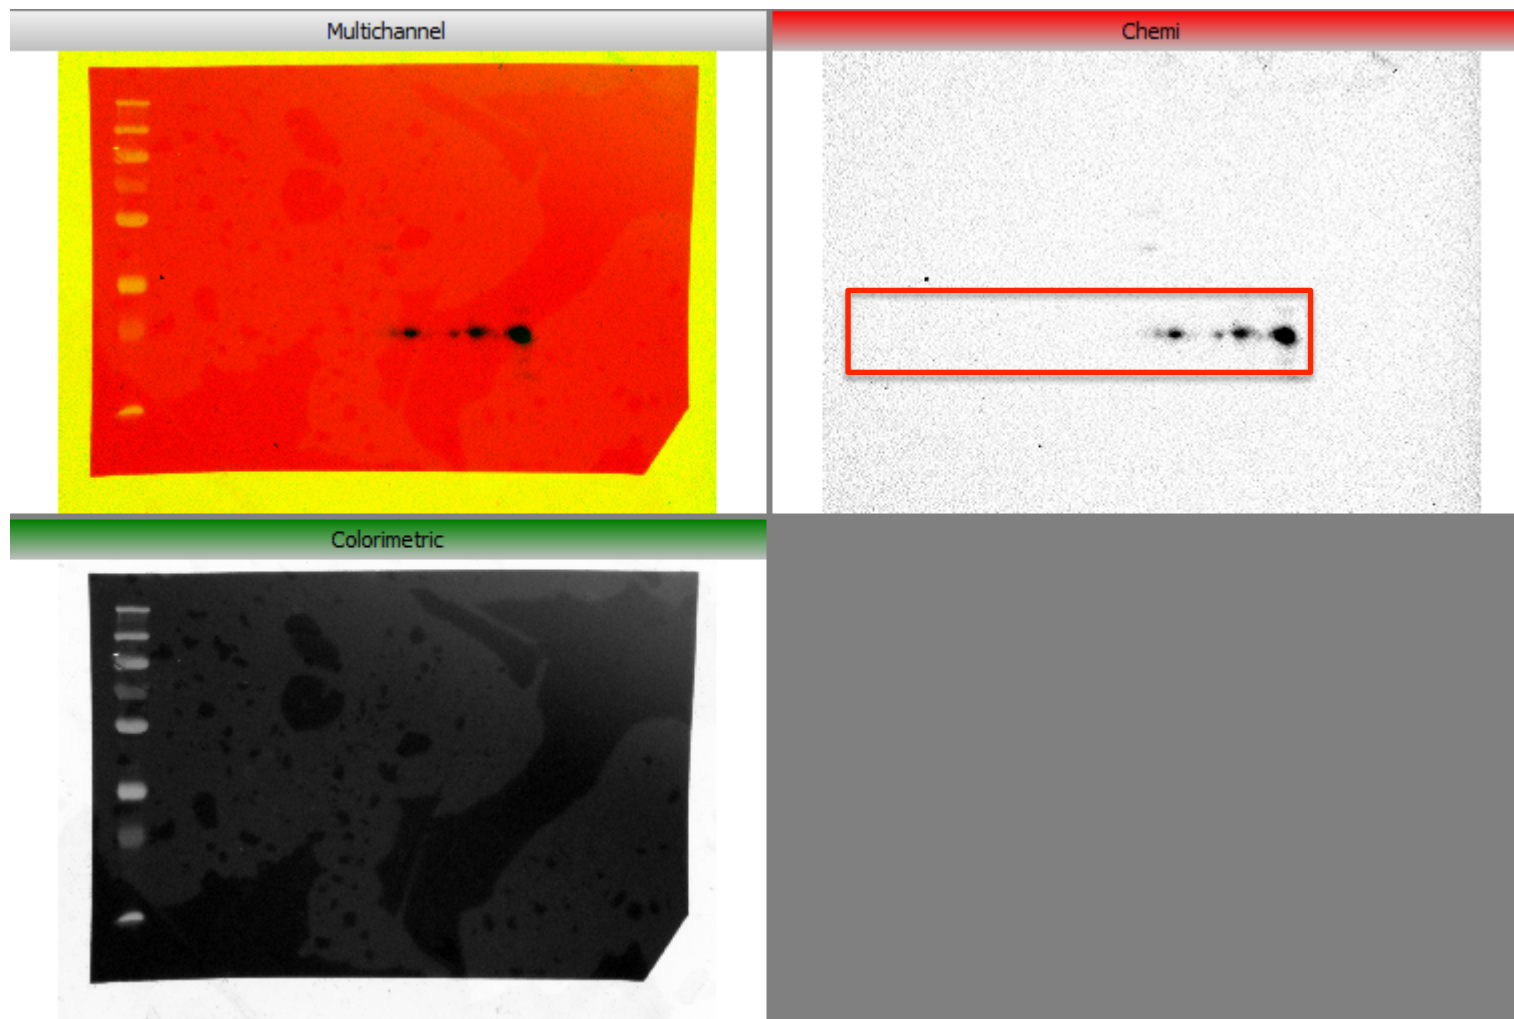

Source data Figure 5C (IP) (cropped region indicated)

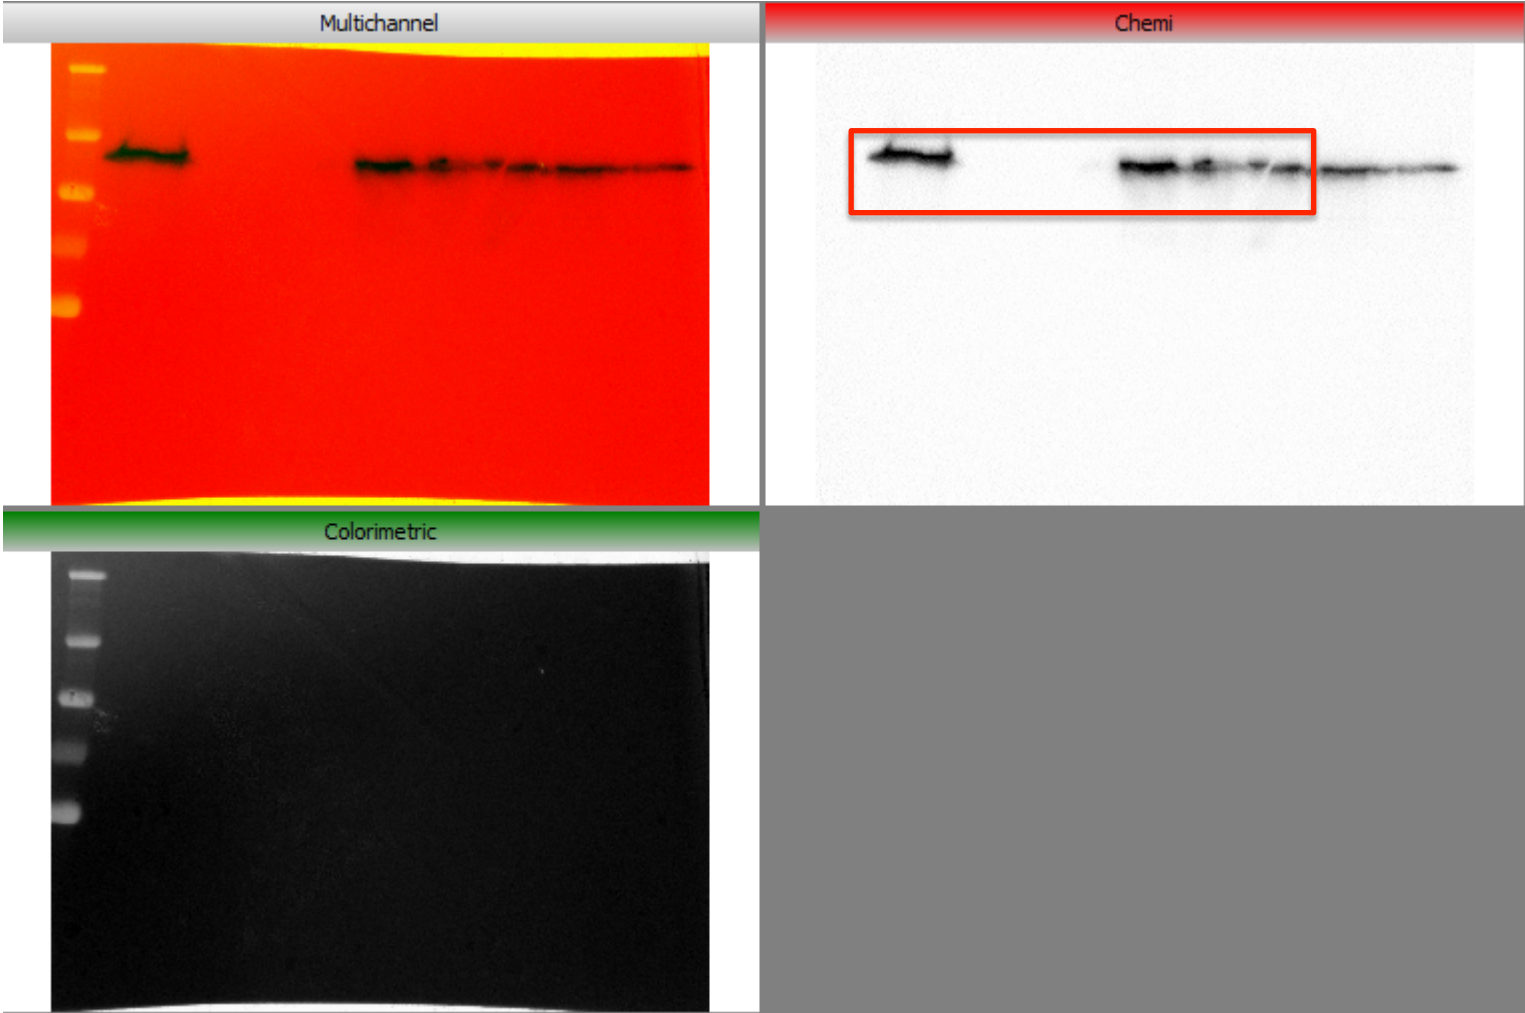

Anti NLRP3

Source data Figure 5D (Input) (cropped region indicated)

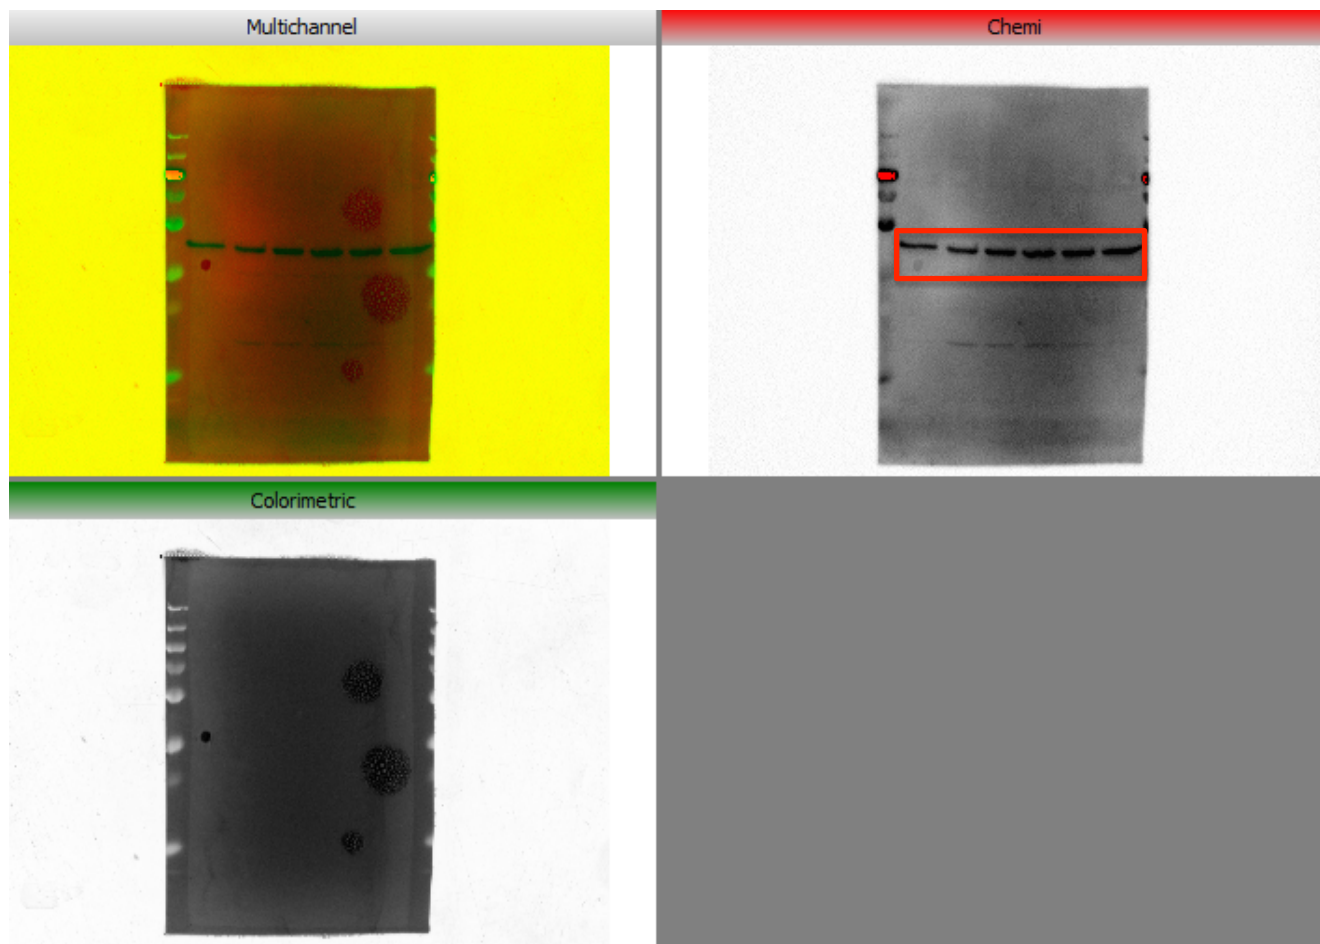

Anti Actin

Source data Figure 5D (Input) (cropped region indicated)

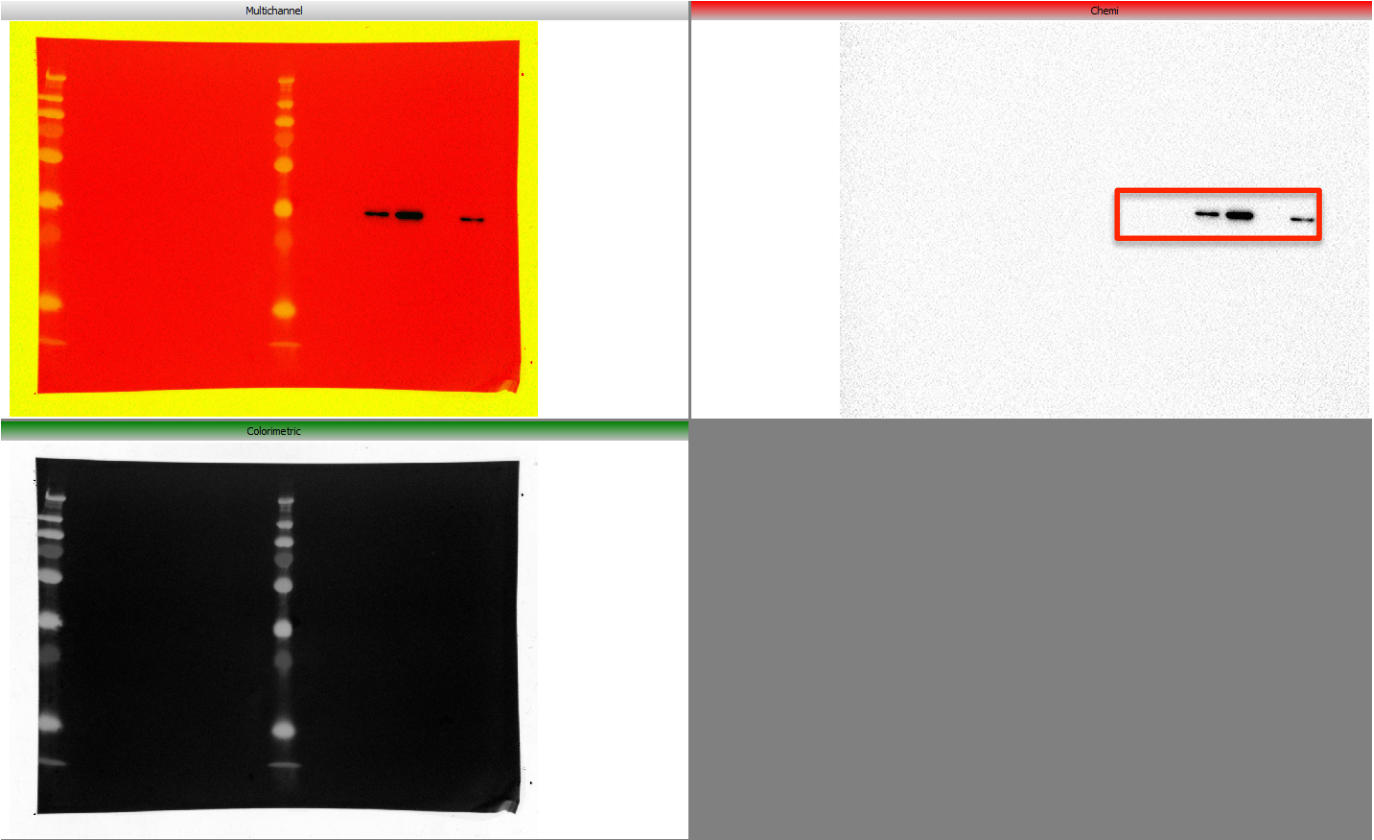

Source data Figure 5D (Input) (cropped region indicated)

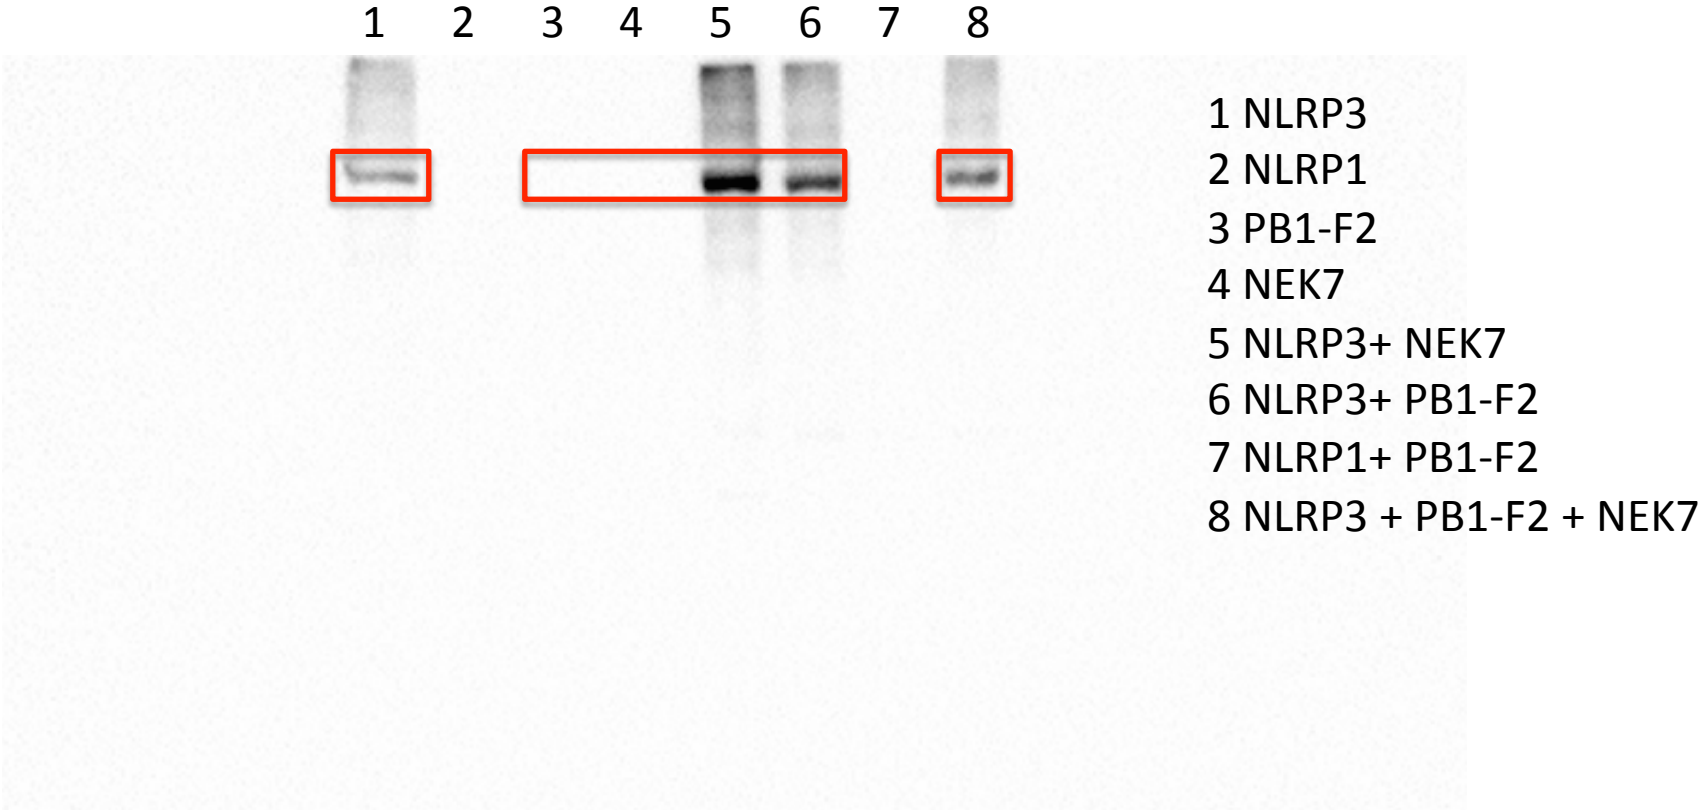

NLRP3

Source data Figure 5D (cropped region indicated)

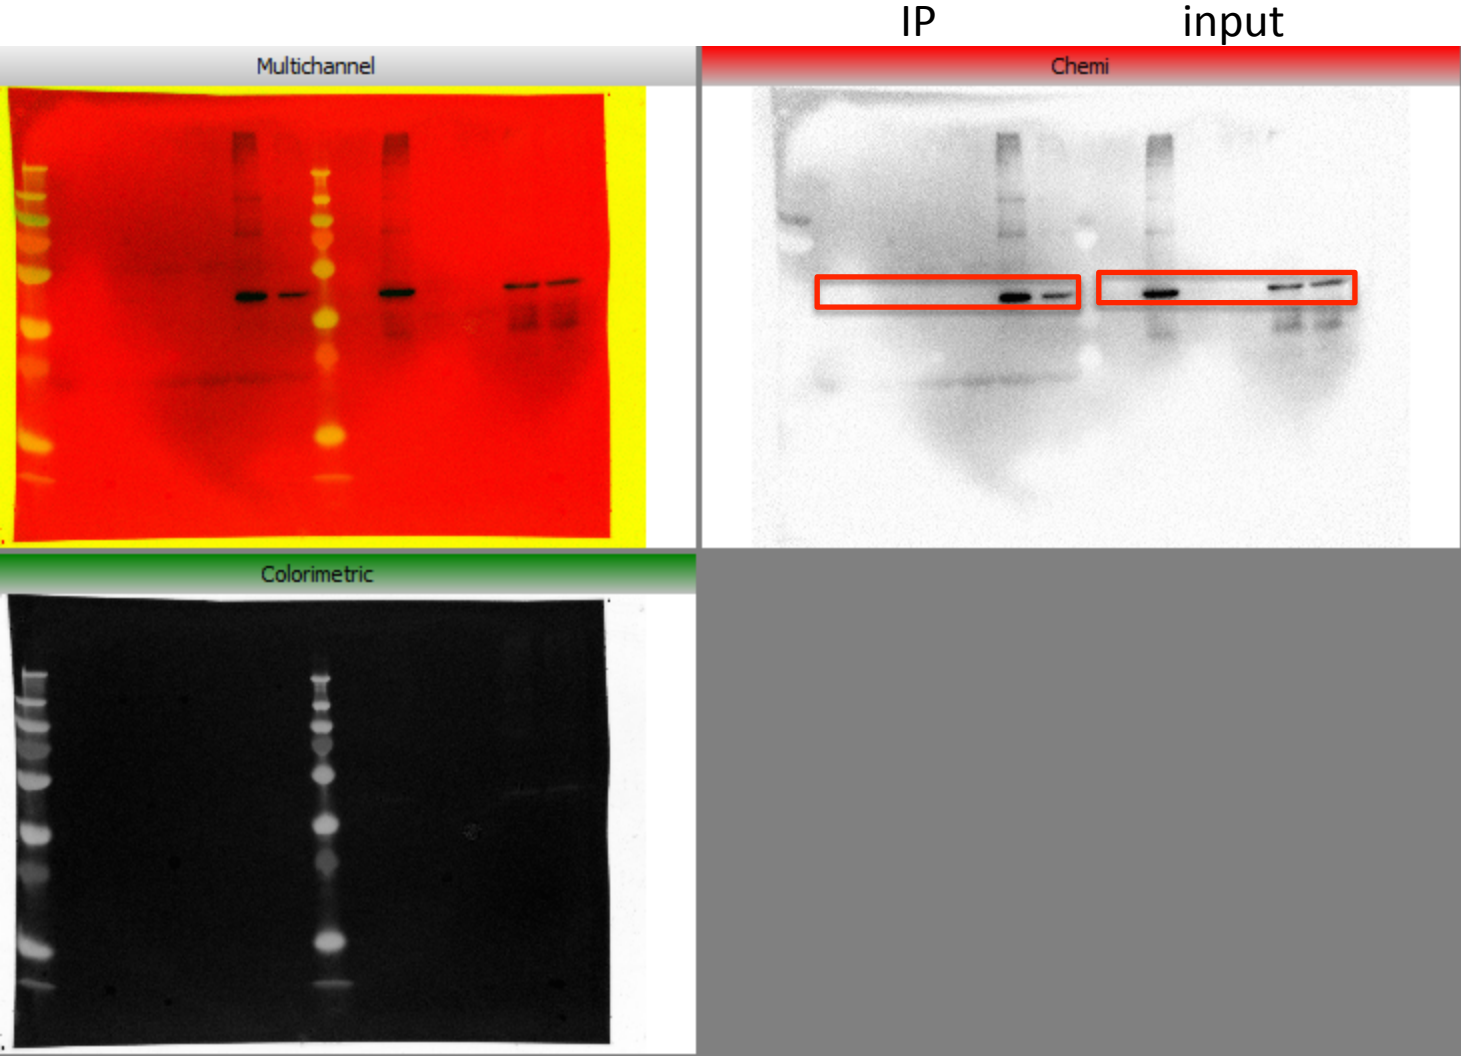

PB1-F2



Source data Figure 5D (IP) (cropped region indicated)

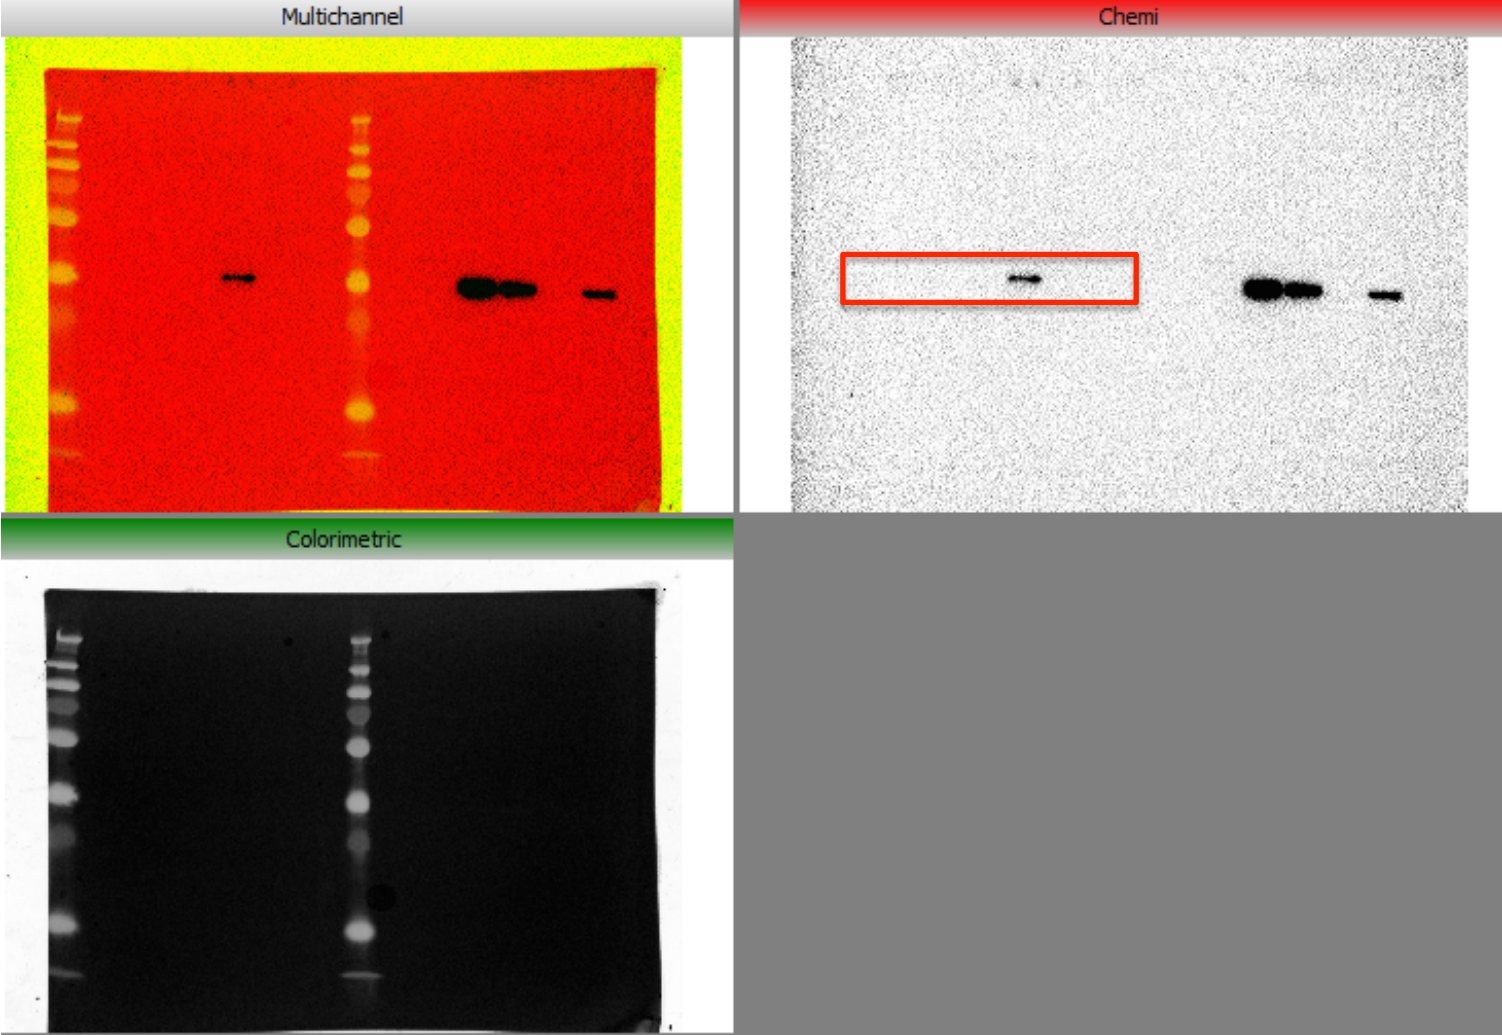

NEK7

Source data Figure 5D (IP) (cropped region indicated)

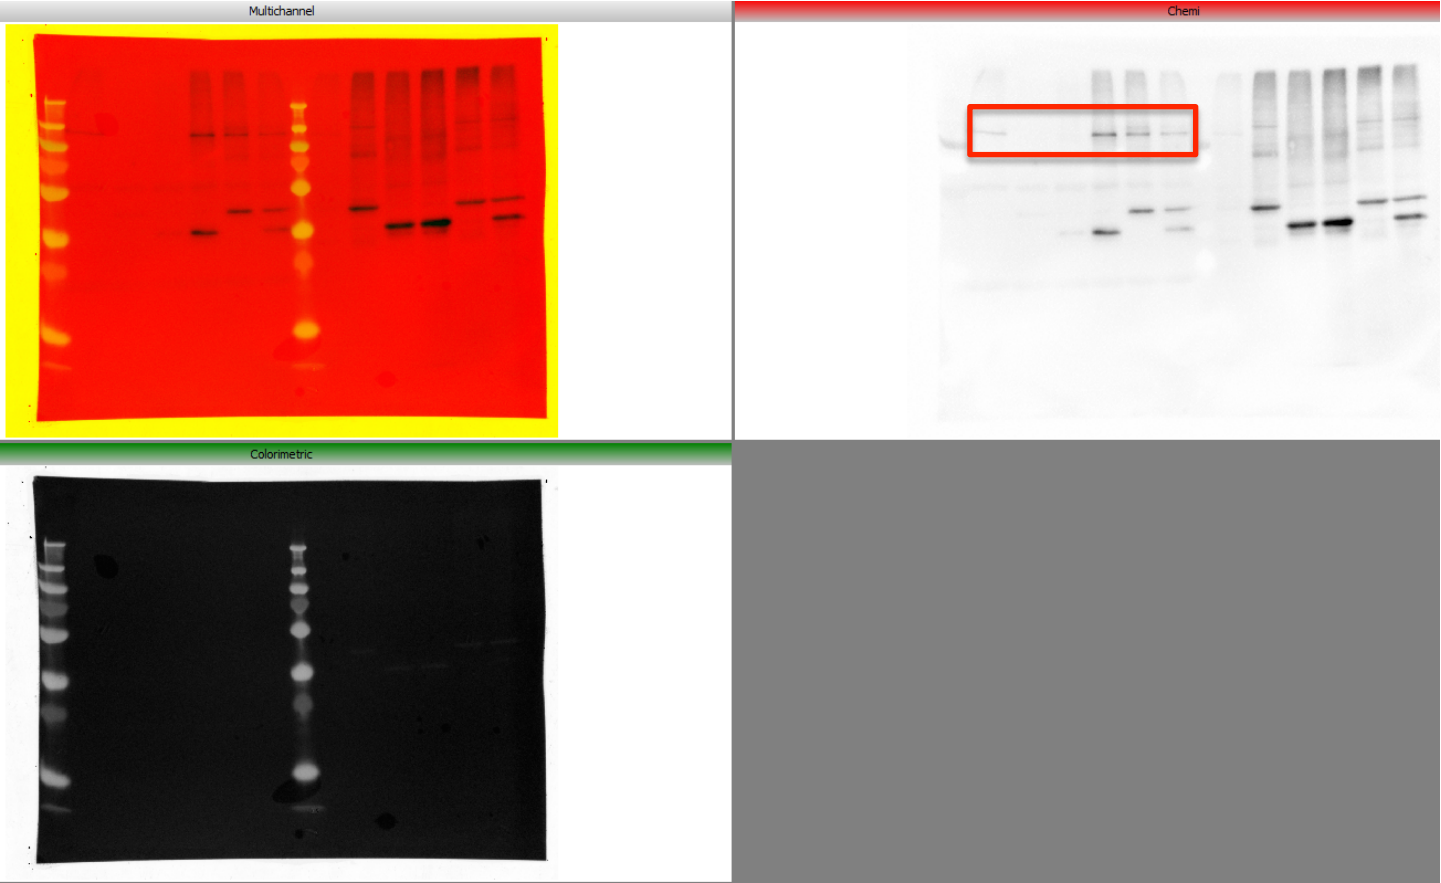

NLRP3

Source data Figure 5E (Input) (cropped region indicated)

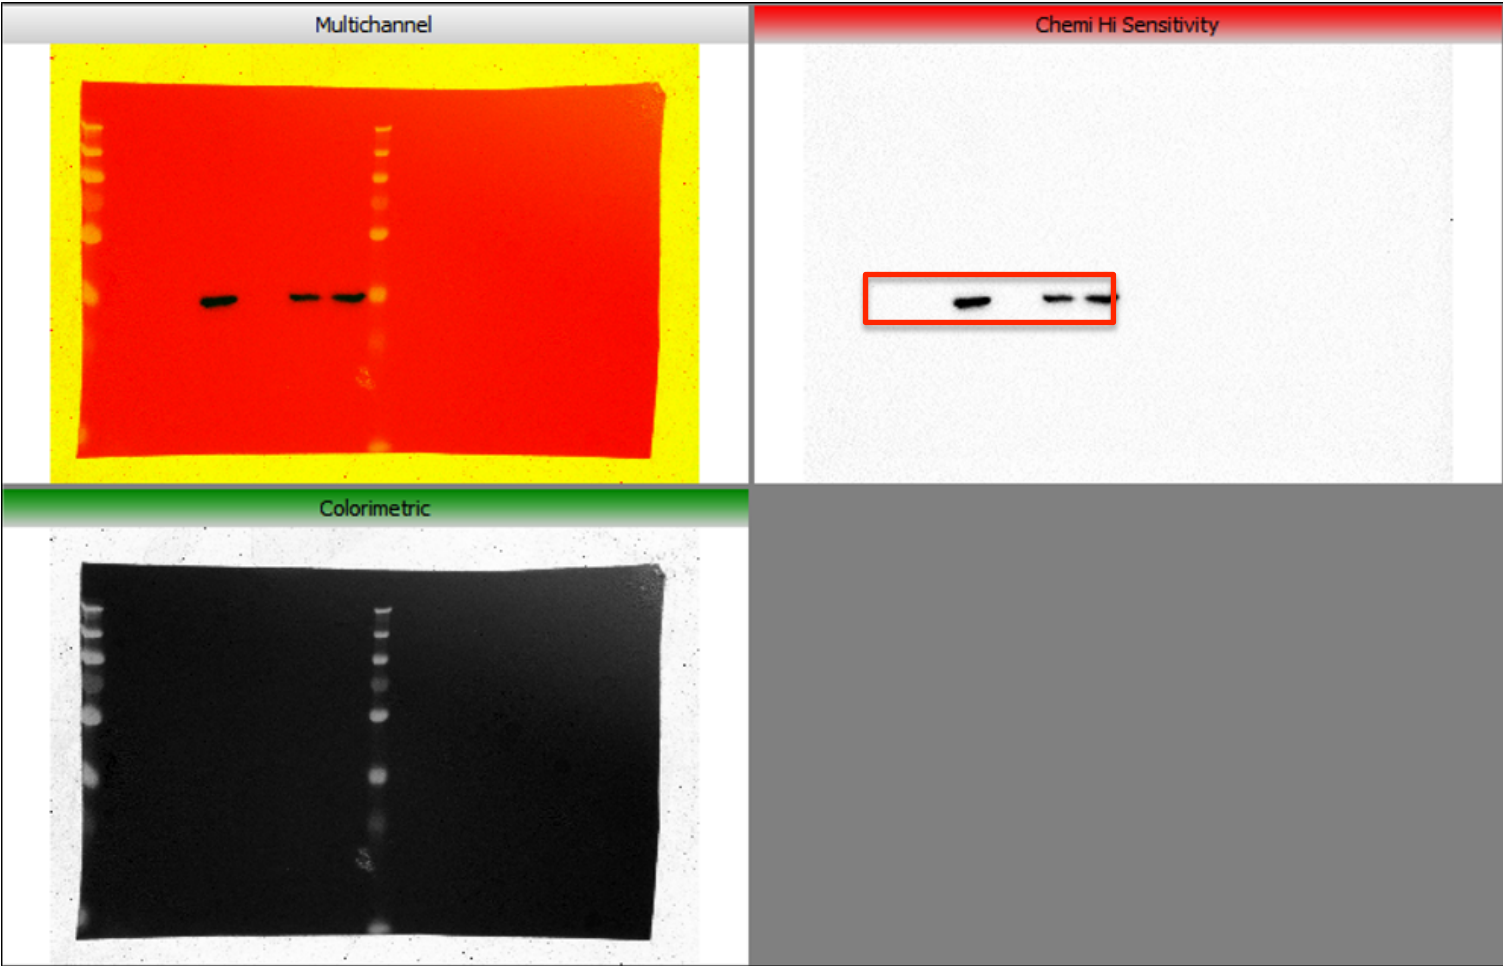

Anti NEK7

Source data Figure 5E (Input) (cropped region indicated)

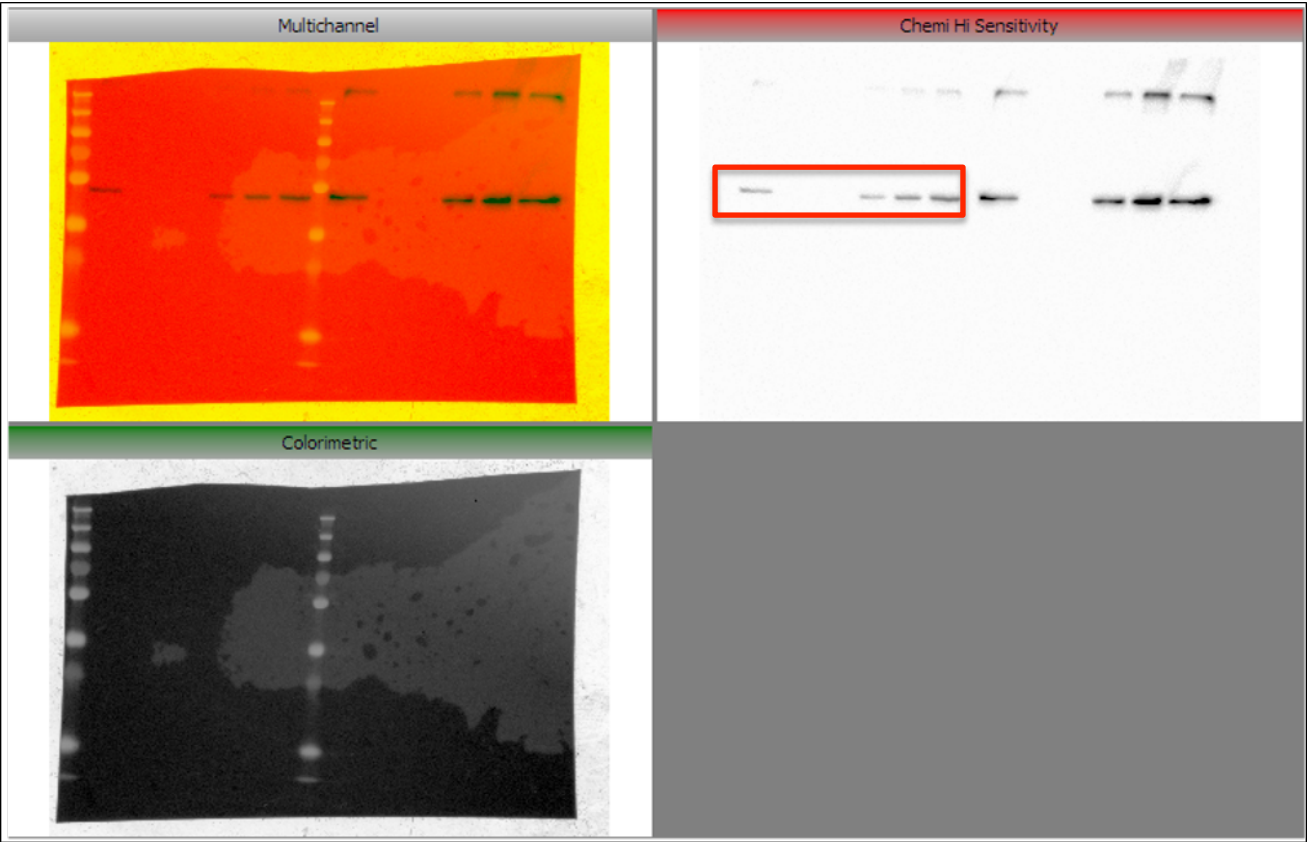

Anti LRR

Source data Figure 5E (Input) (cropped region indicated)

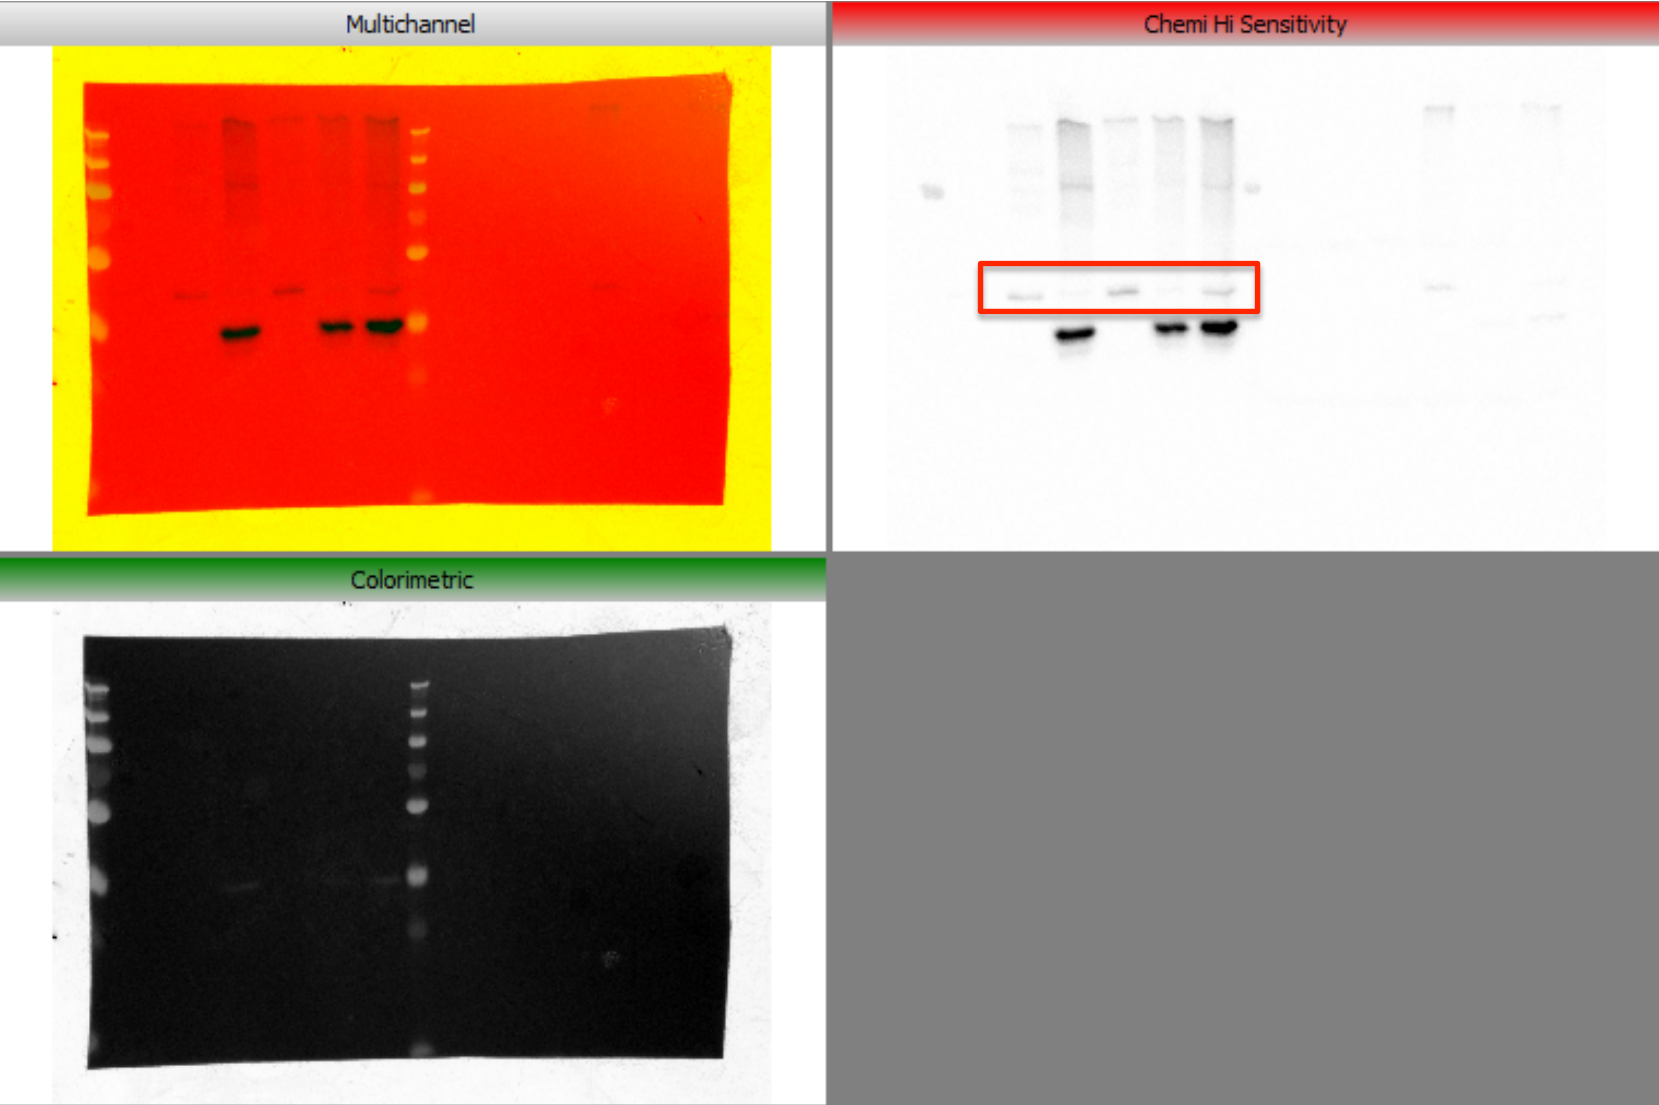

Anti PB1-F2

Source data Figure 5E (Input) (cropped region indicated)

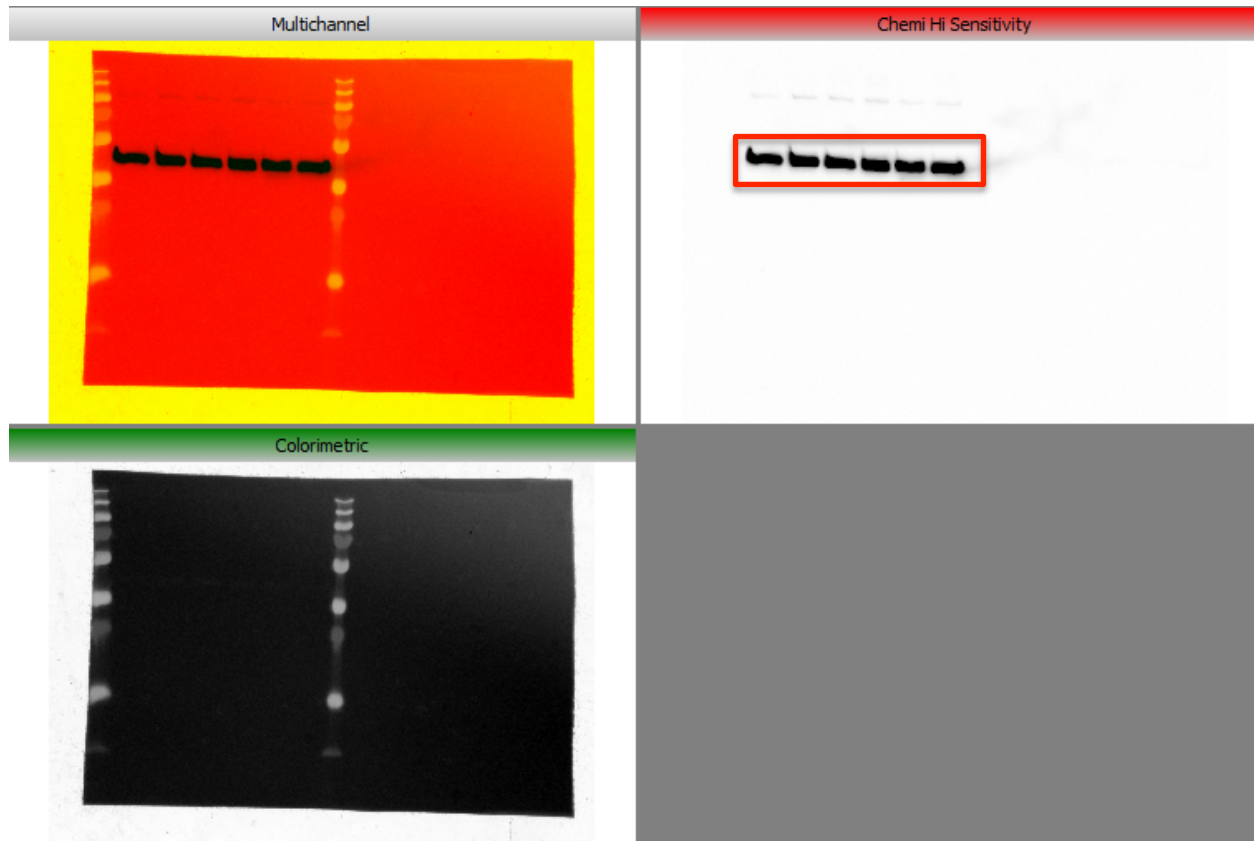

Anti Actin

Source data Figure 5E (IP) (cropped region indicated)

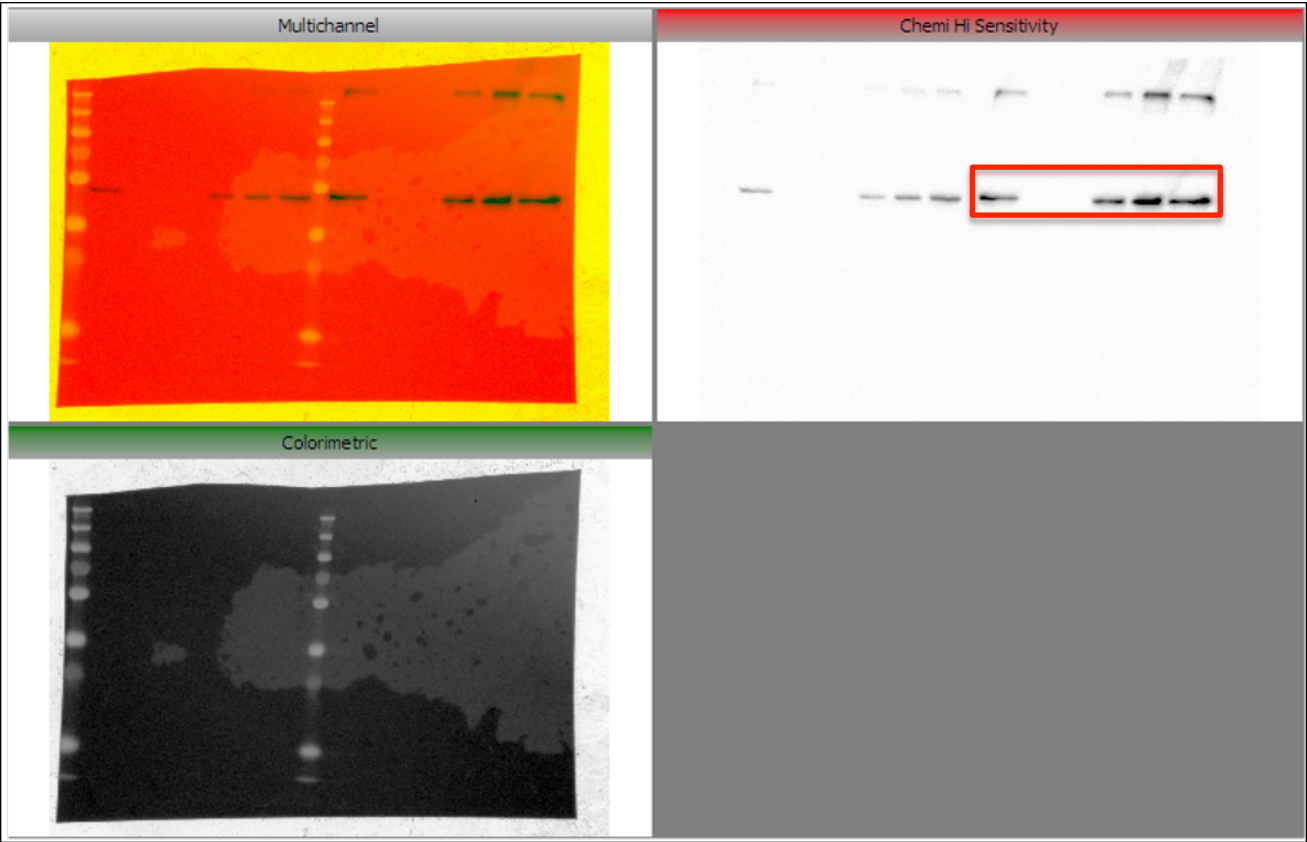

Anti LRR

Source data Figure 5E (IP) (cropped region indicated)

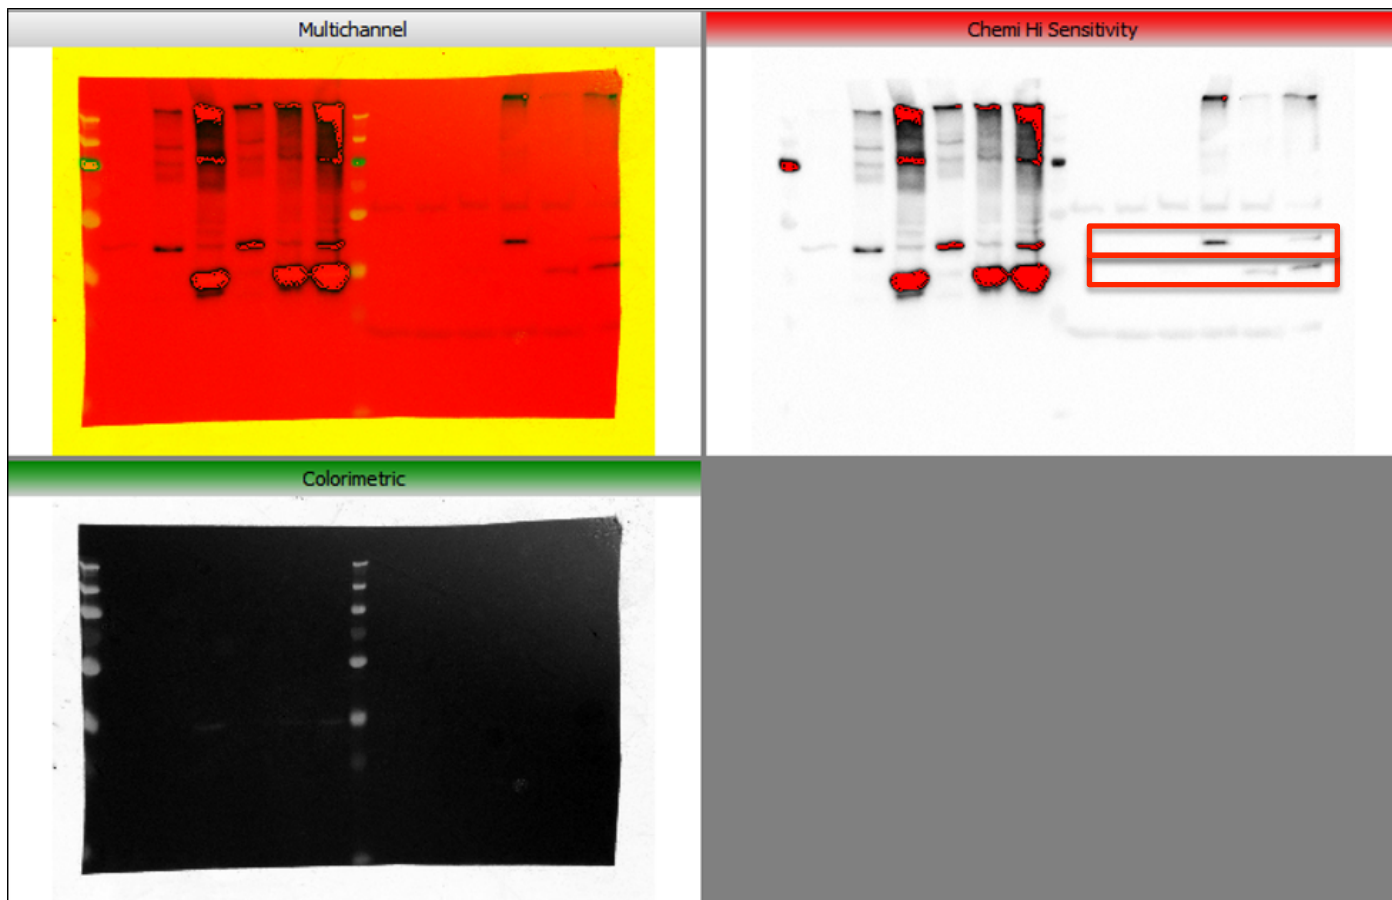

Anti PB1-F2 and NEK7



Source data Figure 5G (Input) (cropped region indicated)

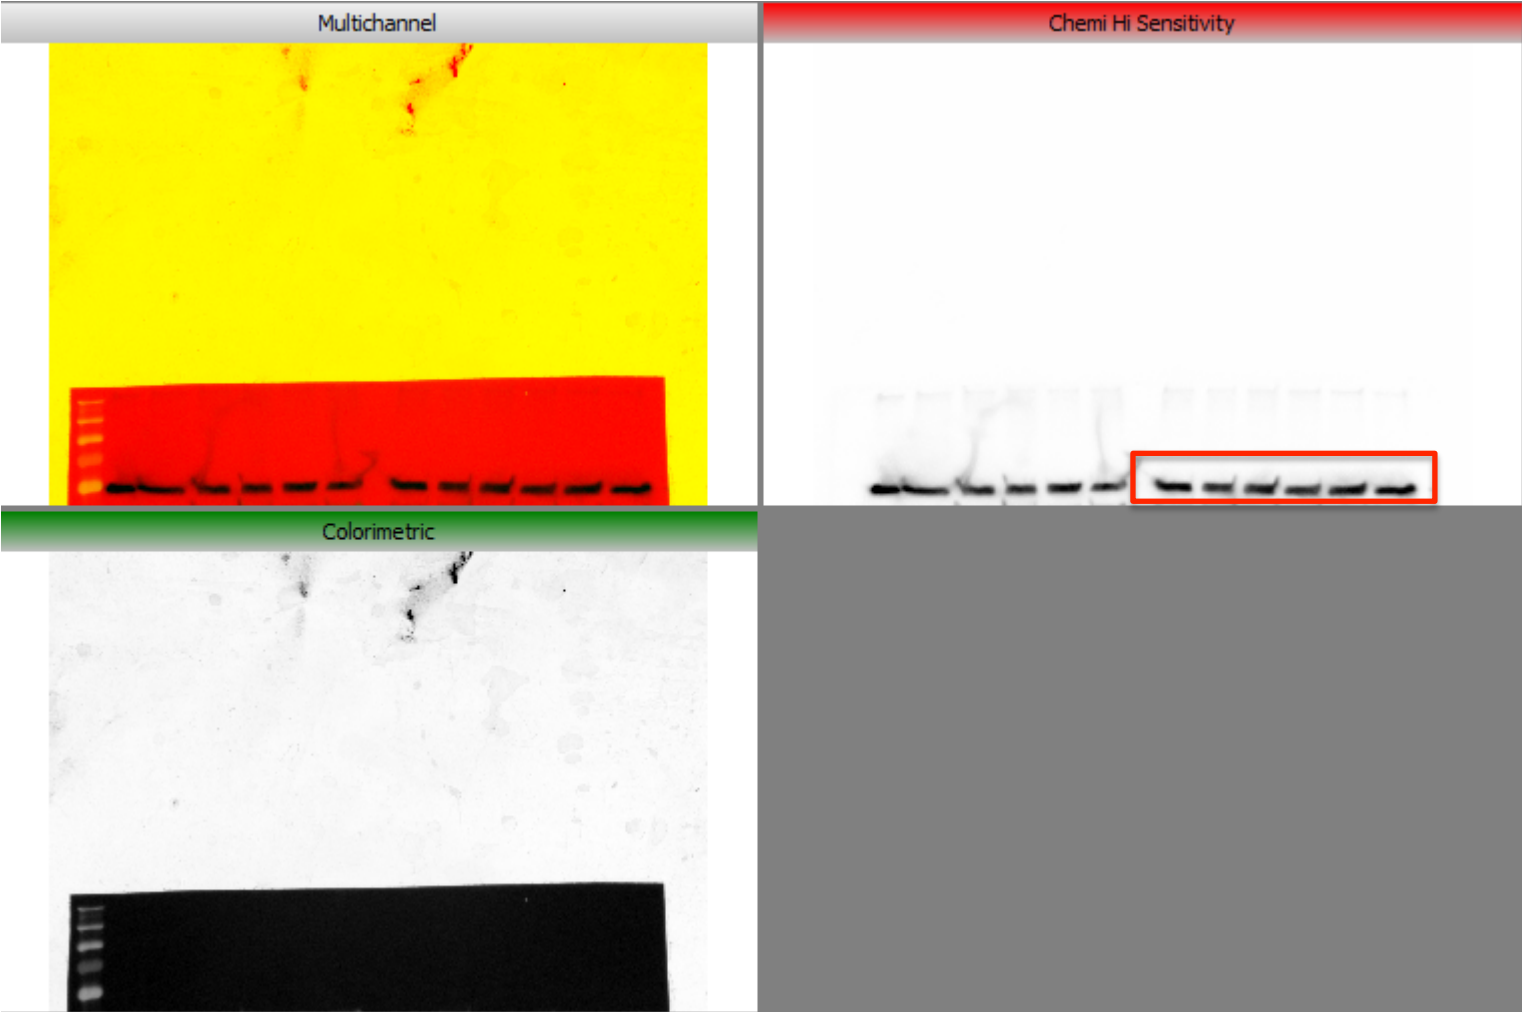

Anti Tubulin

Source data Figure 5G (Input) (cropped region indicated)

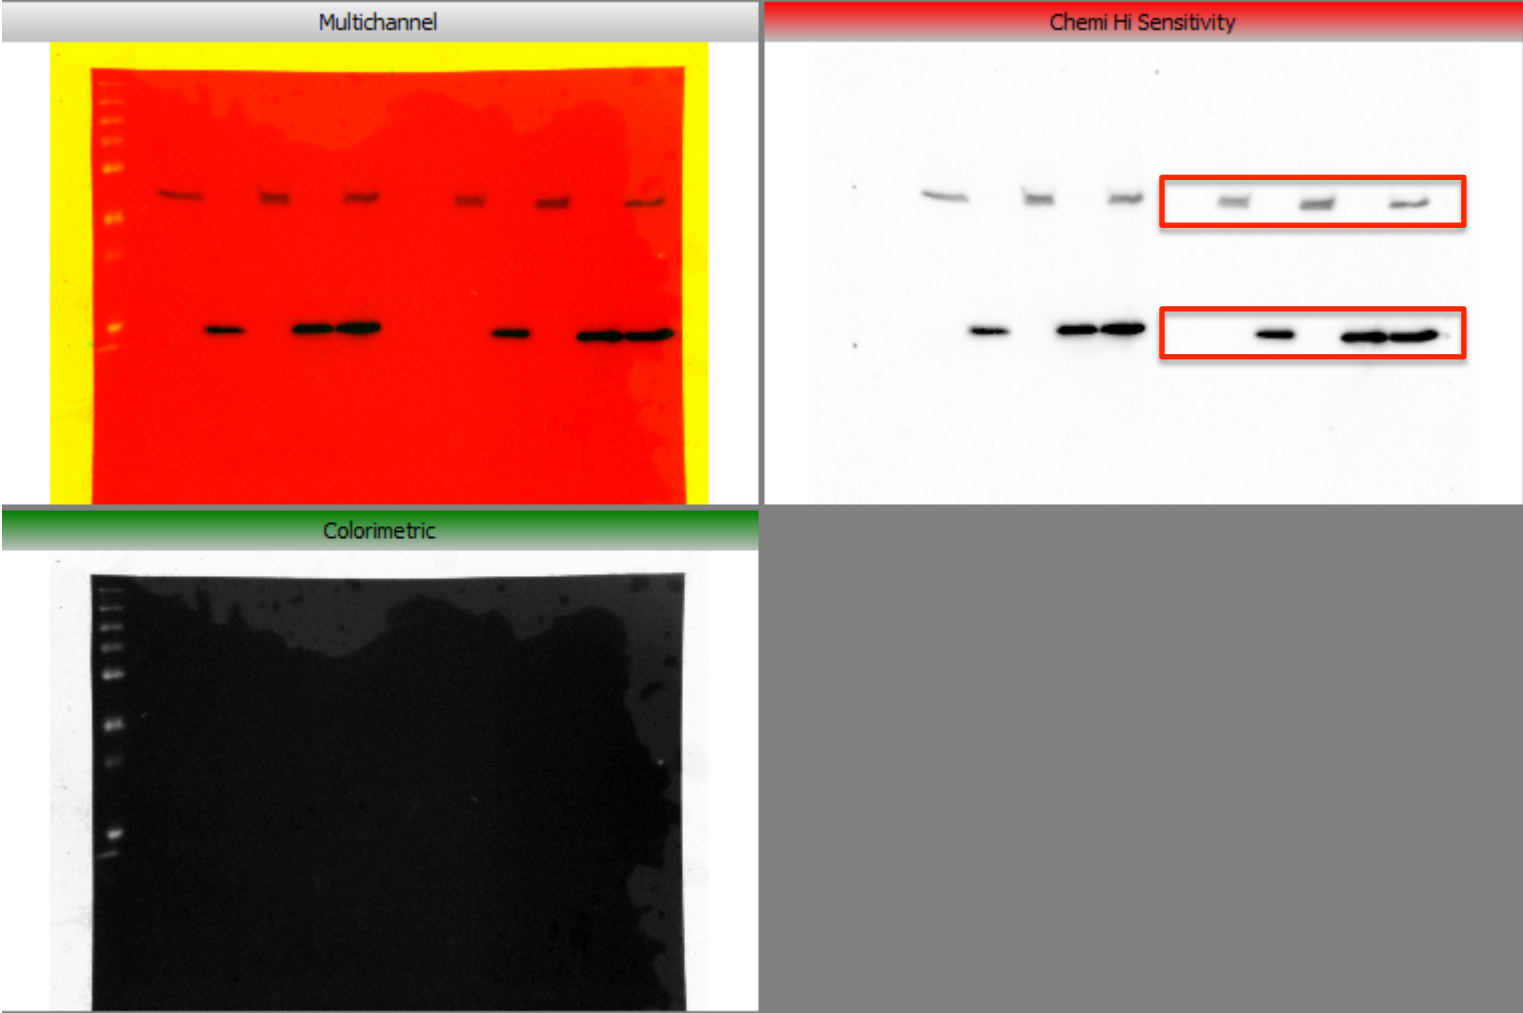

V5 PB1-F2 and V5 Pyrrin

Source data Figure 5G (Input) (cropped region indicated)

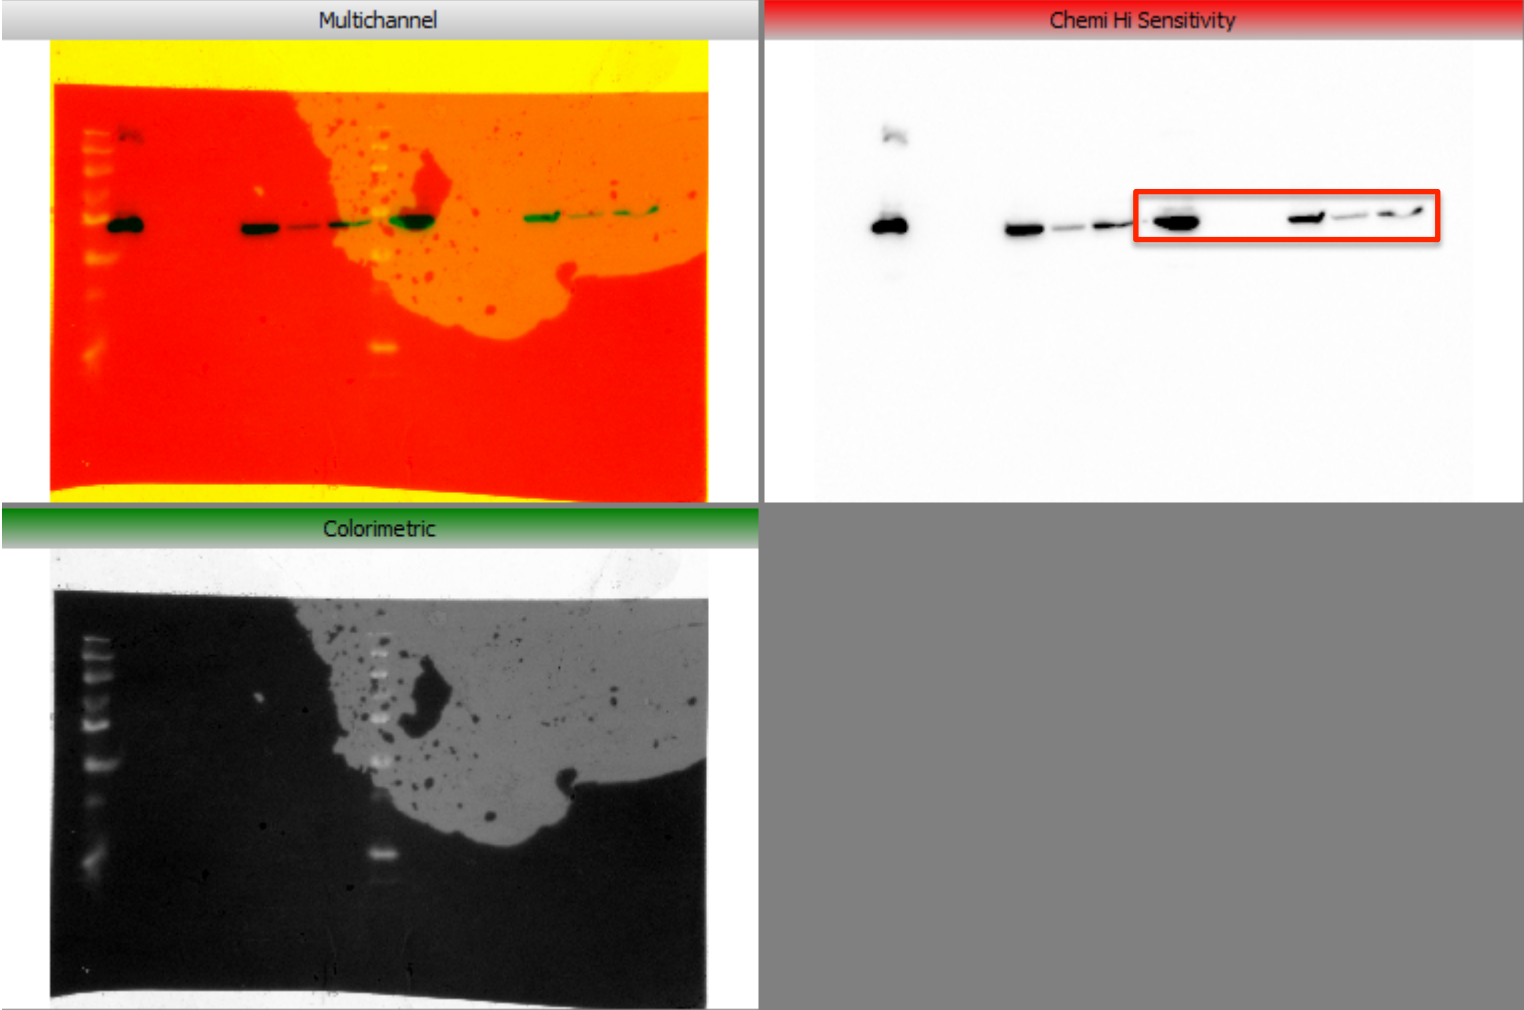

Anti LRR

Source data Figure 5G (IP) (cropped region indicated)

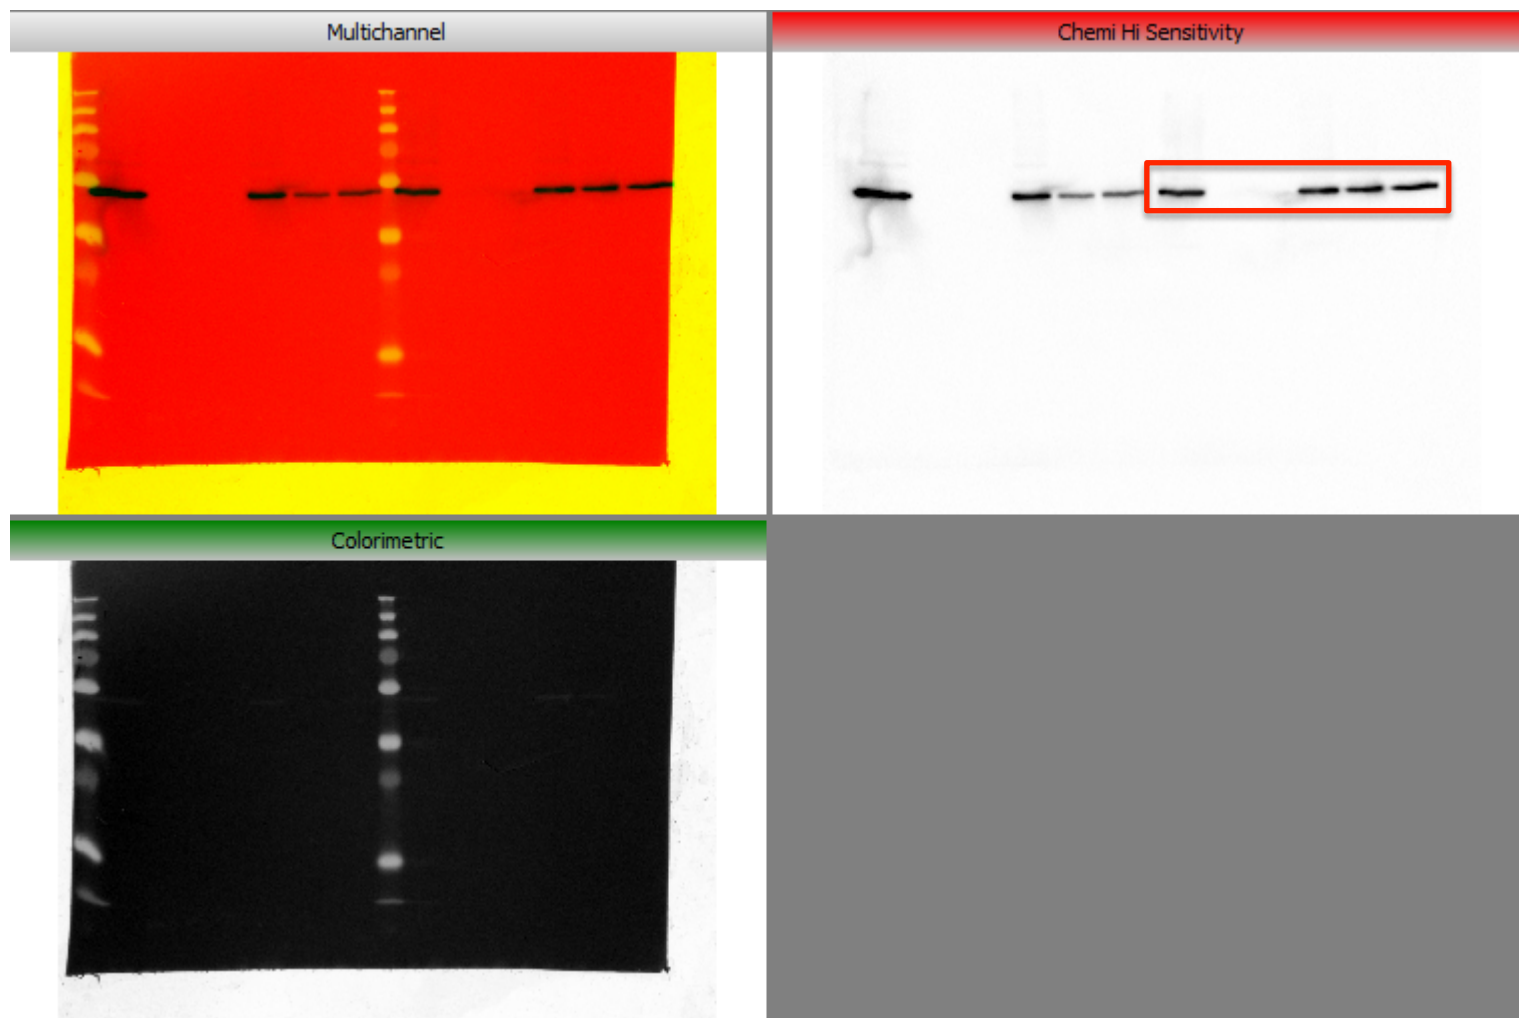

LRR

Source data Figure 5G (IP) (cropped region indicated)

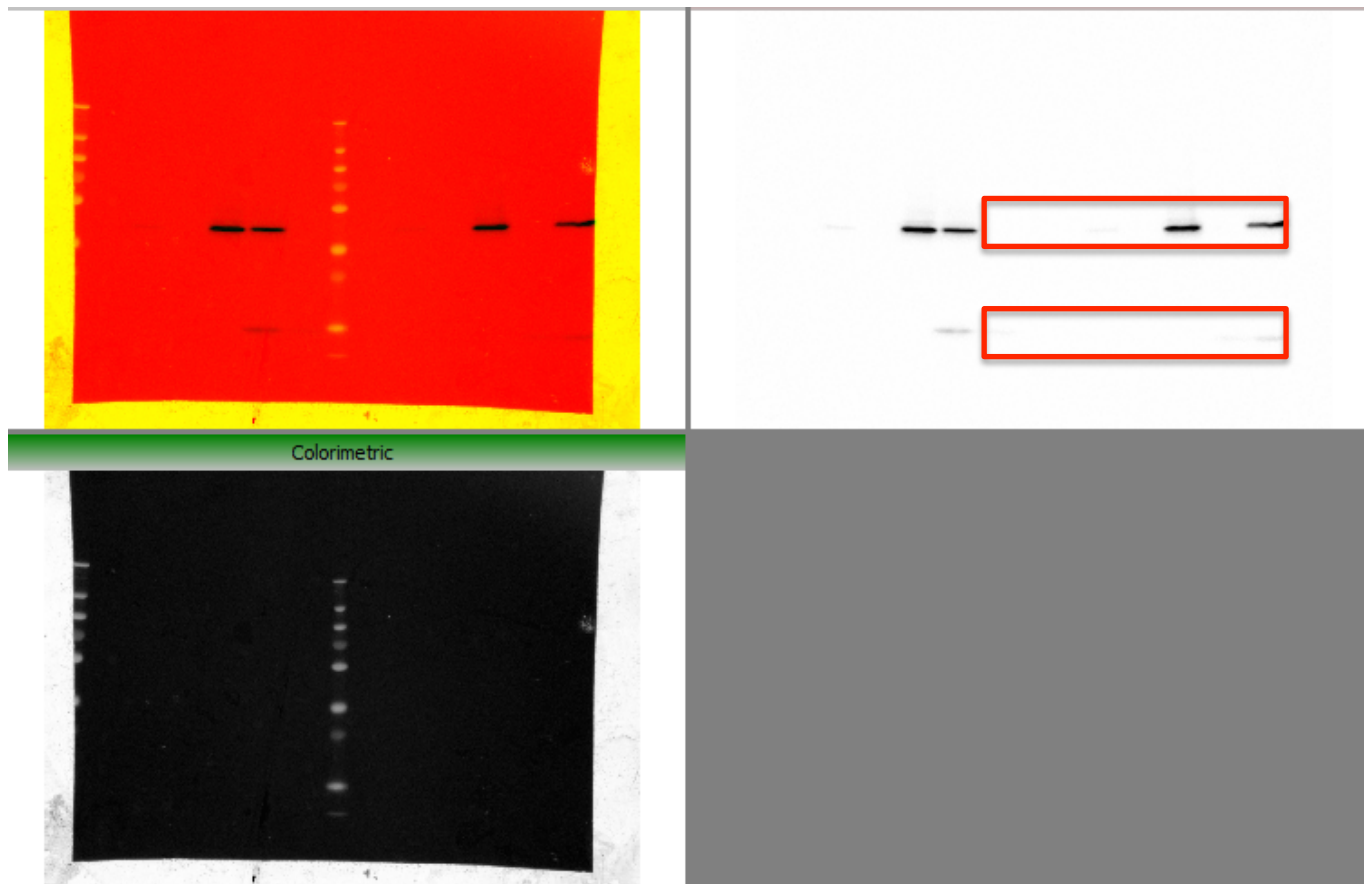

Anti V5 Pyrin and PB1-F2
